# Supplementary material for: Whole-Genome Identification of APX and CAT Gene Families in Cultivated and Wild Soybeans and Their Regulatory Function in Plant Development and Stress Response
Source: Antioxidants (Basel). 2022 Aug 22;11(8):1626. doi: 10.3390/antiox11081626 (PMC9404807; doi:10.3390/antiox11081626)
Supplement: Supplementary file 1 [file antioxidants-11-01626-s001.zip]

Archive with 10 entries (10 files):
- Supplementary tables Legends.pdf
- Table S1.xlsx
- Table S2.xlsx
- Table S3.xlsx
- Table S4.xlsx
- Table S5.xlsx
- Table S6.xlsx
- Table S7.xlsx
- Table S8.xlsx
- Table S9.xlsx
