# Supplementary material for: Whole-Genome Identification of APX and CAT Gene Families in Cultivated and Wild Soybeans and Their Regulatory Function in Plant Development and Stress Response
Source: Antioxidants (Basel). 2022 Aug 22;11(8):1626. doi: 10.3390/antiox11081626 (PMC9404807; doi:10.3390/antiox11081626)
Supplement: Supplementary file 1 [file antioxidants-11-01626-s001.zip › Table S1.xlsx]

## Sheet: Arachis duranis
Adu		APX	Protein	Loc	Chromosome
>aradu.V14167.gnm1.ann1.Aradu.T3VDH.1 ascorbate peroxidase 3; IPR010255 (Haem peroxidase); GO:0004601 (peroxidase activity), GO:0006979 (response to oxidative stress), GO:0020037 (heme binding), GO:0055114 (oxidation-reduction process)	Aradu.T3VDH.1	>AduAPX3.1	MALPVVVDAEYLKEVDKARRDLRALIANRNCAPLMLRLAWHDAGTYDVNTKTGGANGSIRNEEEYSHGANNGLKKAIDFCEEVKAKYSKISYADLYQLAGVVAVEVTGGPTVEFVPGRKDSKVSTKEGRLPDAKLGVSHLRSIFYRMGLSDKDIVALSGAHTLGRAHQERSGFEGPWTQDPLKFDNSYFVELLKGESAGLLQLPTDKALLEDPEFRRYVELYAKDEDAFFRDYAESHKKLSELGFATSSKPIFPKDGTILAQSAVGVVVTAAVVILGYLYEVHKRGK.	LOC107476561	3
>aradu.V14167.gnm1.ann1.Aradu.I62QK.1 ascorbate peroxidase 1; IPR010255 (Haem peroxidase); GO:0004601 (peroxidase activity), GO:0006979 (response to oxidative stress), GO:0020037 (heme binding), GO:0055114 (oxidation-reduction process)	Aradu.I62QK.1	>AduAPX3.2	ERQAMGKSYPTVSADYQKAVEKAKKKLRGFIAEKRCAPLMLRLAWHSAGTFDVATKSGGPFGTIKHPSELAHGANAGLDIAVRLLEPIKEQFPTLSYADFYQLAGVVAVEITGGPEIPFHPGREDKPEPPPEGRLPDATKGSDHLRDVFGKAMGLSDQDIVALSGGHTLGAAHKERSGFEGPWTSNPLIFDNSYFKELLSGEKEGLLQLPSDKALLSDPVFRPLVEKYAADEDAFFADYAEAHLKLSELGFADA.	LOC107476911	3
>aradu.V14167.gnm1.ann1.Aradu.A61Z4.1 ascorbate peroxidase 3; IPR010255 (Haem peroxidase); GO:0004601 (peroxidase activity), GO:0006979 (response to oxidative stress), GO:0020037 (heme binding), GO:0055114 (oxidation-reduction process)	Aradu.A61Z4.1	>AduAPX5.1	MLYLQRKHTSASSSSSSSLSVVIKTRKLSSFRSIYTLRIMAKEGVAVDFEYAKQIDKARRELRALISSRNCAPLMLRLAWHDAGTYDAKTRTGGANGSIRNQQELNHQANRGLETAVQFCEEVKAKCPRVSYADLYQLAGVIAVEVTGGPTIRFVPGRKDSLESPPEGRLPDATKDAQHLRDVFYRMGLTDKDIVALSGGHTLGKAHKERSGFEGQWTENHLKFDNSYFVELMDSKDSFKLPTDKVLVEDPEFRKYVVRYKNDEDAFFADYAESHKKLSELGFNPNRVSDSRIVRGVIGFLVASTVIVMGYLIEINRKSK.	LOC107487471	5
>aradu.V14167.gnm1.ann1.Aradu.993Q7.1 ascorbate peroxidase 1; IPR002877 (Ribosomal RNA methyltransferase FtsJ domain), IPR010255 (Haem peroxidase); GO:0004601 (peroxidase activity), GO:0006979 (response to oxidative stress), GO:0008168 (methyltransferase activity), GO:0020037 (heme binding), GO:0032259 (methylation), GO:0055114 (oxidation-reduction process)	Aradu.993Q7.1	>AduAPX7.1	LSFESFAWTNVESVLFCFVQKEYSGSARTGDGSVRRDQVGGVKILRIVILLVHQGSLNYISSQDKADPPPEGRLPDATKGNDHLRELFVQTMGLTDQDIVALSGAHTLGRCHKDRSGFEGPWTSNPLVFDNSYFTELVGGEREGLLQLPTDKALLEDPVFRPLVEKYAKDEDAFFADYTQAHLKLSELGVPNFWWWFCSTITIPKCNTIKFWLLTFQQKGFSVILSDMCPLVSGITTKDAALSVELGMRALDLAVGRRAAFSVYADGDDPSTLAETGVLQVGGNLLIKLLESEDAKGGVNNLYELWALLNFLLPEIFSSAETFDEWFQISGKMI.	LOC107457615	7
>aradu.V14167.gnm1.ann1.Aradu.PV98V.1 stromal ascorbate peroxidase	Aradu.PV98V.1	>AduAPX7.2	MSHHLNKNPYLNNVLKKADFQVAFFNDYAEAHAKLRNLGAKFDPPEGIVLDPSSKPQAEKFEAAKYSTEKD.	LOC107458853	7
>aradu.V14167.gnm1.ann1.Aradu.21285.1 ascorbate peroxidase 3; IPR010255 (Haem peroxidase); GO:0004601 (peroxidase activity), GO:0006979 (response to oxidative stress), GO:0020037 (heme binding), GO:0055114 (oxidation-reduction process)	Aradu.21285.1	>AduAPX8.1	MAERVFLTHPSLTLPSQPFPTTRMASTATAAIAASRIIPSATALSSSASRSFFSSSSTSRSSLKCLHLHSSSRISHLFVNQRRAEVRVSSGDYATVSSPKSLASDPDQLKSAREDIKELLRTKFCHPILIRLGWHDAGTYNKNIEEWPQRGGANGSLRFEVELKHAANAGLVNALKLIQPIKDKYARVTYADLFQLAGATAVEEAGGPKIPMKYGRVDVSSPEQCPEEGRLPDAGPPSPADHLRQVFYRMGLNDKEIVALSGAHTLGRSRPERSGWGKPETKYTKDGPGAPGGQSWTVQWLKFDNSYFKYIKEKKDEDLLVLPTDAVLFEDPSFKVYAEKYAEDQVAFFNDYAEAHAKLSNLGAKFDPPEGIVLDPSPKPQAEKFEAAKYSTGKRELSD…	LOC107460700	8
>aradu.V14167.gnm1.ann1.Aradu.E7RT1.1 ascorbate peroxidase 1; IPR010255 (Haem peroxidase); GO:0004601 (peroxidase activity), GO:0006979 (response to oxidative stress), GO:0020037 (heme binding), GO:0055114 (oxidation-reduction process)	Aradu.E7RT1.1	>AduAPX8.2	MGKSYPTVSEDYEKAIQKARRKLRGLIFEKQCAPLMLRLAWHSAGTFDVKTKTGGPFGTMKHEAEQKHEANRGLDIAVNLLEPLKQHFPNITYADFYQLAGVVAVEVTGGPEVPFHPGREDKADPPPEGRLPDATKGNDHLRELFVQTMGLTDQDIVALSGAHTLGRCHKDRSGFEGPWTSNPLVFDNSYFTELVGGEREGLLQLPTDKALLEDPVFRPLVEKYASDEDAFFADYTQAHLKLSELGFADA.	LOC107461634	8
>aradu.V14167.gnm1.ann1.Aradu.F81FV.1 ascorbate peroxidase 6	Aradu.F81FV.1	>AduAPX8.3	MTRPSRRRNVCGATTTVRATTLHRQVSPRKSQPPPLPLFVAQLGTASASSVQPFHPFGLLLLATVPVPFVLFKPVRRYKSRAFKSVRVVVHVLDPNTEFVFKFCTHFGGGKFTGFGSPTSFDNAYYKILLEKSWANSGGMSSMIGLPSDLKCRFCSQMLQY.	LOC107463271	8
>aradu.V14167.gnm1.ann1.Aradu.UHQ4T.1 ascorbate peroxidase 4; IPR010255 (Haem peroxidase); GO:0004601 (peroxidase activity), GO:0006979 (response to oxidative stress), GO:0020037 (heme binding), GO:0055114 (oxidation-reduction process)		>AduAPX	MASYHVIDEGHFSLKRRDILKSLGMTIGLELIGSSGSLVGTANAADLIQRRQRSEFQSKIKGTLFTAIKGNPDLVPSLLTLALNDAVTYDKATKSGGPNGSIRFSSEISRPENTRLSGALSLIEEAKKEIDSYSKAGPISYADLIHYAAQSAVKSTFIAAAIRKCGGNEEKGNLLYTAYGSNGQWGLFDKQFGREDAQEPDPEGRVPLWEKASVQEMKDKFSAVGLGPRQLAVLSAFLGPDQAATEAKLASDKDVAPWVDKYQRSRETVSQTDYEVDLITTFTKLSTLGQQINYEAYTYAPPKIDITKLKL.	thylakoid lumenal 29 kDa protein, chloroplastic isoform X1

## Sheet: A. thaliana
>AT1G07890	PF00141	APX1	>AthAPX1.1	MTKNYPTVSEDYKKAVEKCRRKLRGLIAEKNCAPIMVRLAWHSAGTFDCQSRTGGPFGTMRFDAEQAHGANSGIHIALRLLDPIREQFPTISFADFHQLAGVVAVEVTGGPDIPFHPGREDKPQPPPEGRLPDATKGCDHLRDVFAKQMGLSDKDIVALSGAHTLGRCHKDRSGFEGAWTSNPLIFDNSYFKELLSGEKEGLLQLVSDKALLDDPVFRPLVEKYAADEDAFFADYAEAHMKLSELGFADA
>AT1G77490.1	PF00141	thylakoidal ascorbate peroxidase | chr1:29117688-29120046 FORWARD LENGTH=426	>AthAPX1.2	MSVSLSAASHLLCSSTRVSLSPAVTSSSSSPVVALSSSTSPHSLGSVASSSLFPHSSFVLQKKHPINGTSTRMISPKCAASDAAQLISAKEDIKVLLRTKFCHPILVRLGWHDAGTYNKNIEEWPLRGGANGSLRFEAELKHAANAGLLNALKLIQPLKDKYPNISYADLFQLASATAIEEAGGPDIPMKYGRVDVVAPEQCPEEGRLPDAGPPSPADHLRDVFYRMGLDDKEIVALSGAHTLGRARPDRSGWGKPETKYTKTGPGEAGGQSWTVKWLKFDNSYFKDIKEKRDDDLLVLPTDAALFEDPSFKNYAEKYAEDVAAFFKDYAEAHAKLSNLGAKFDPPEGIVIENVPEKFVAAKYSTGKKELSDSMKKKIRAEYEAIGGSPDKPLPTNYFL…
>AT3G09640	PF00141	APX2	>AthAPX3.1	MVKKSYPEVKEEYKKAVQRCKRKLRGLIAEKHCAPIVLRLAWHSAGTFDVKTKTGGPFGTIRHPQELAHDANNGLDIAVRLLDPIKELFPILSYADFYQLAGVVAVEITGGPEIPFHPGRLDKVEPPPEGRLPQATKGVDHLRDVFGRMGLNDKDIVALSGGHTLGRCHKERSGFEGAWTPNPLIFDNSYFKEILSGEKEGLLQLPTDKALLDDPLFLPFVEKYAADEDAFFEDYTEAHLKLSELGFADKE
>AT4G08390.1	PF00141	stromal ascorbate peroxidase | chr4:5314999-5317071 FORWARD LENGTH=372	>AthAPX4.1	MAERVSLTLNGTLLSPPPTTTTTTMSSSLRSTTAASLLLRSSSSSSRSTLTLSASSSLSFVRSLVSSPRLSSSSSLSQKKYRIASVNRSFNSTTAATKSSSSDPDQLKNAREDIKELLSTKFCHPILVRLGWHDAGTYNKNIKEWPQRGGANGSLRFDIELKHAANAGLVNALNLIKDIKEKYSGISYADLFQLASATAIEEAGGPKIPMKYGRVDASGPEDCPEEGRLPDAGPPSPATHLREVFYRMGLDDKDIVALSGAHTLGRSRPERSGWGKPETKYTKEGPGAPGGQSWTPEWLKFDNSYFKEIKEKRDEDLLVLPTDAAIFEDSSFKVYAEKYAADQDAFFKDYAVAHAKLSNLGAEFNPPEGIVI
>AT4G09010	PF00141	APX6	>AthAPX4.2	MGGVSFLSTVPSFTNTTNHQHLTTLSSSSHRSAVIRCSKIEPQVSGESLAFHRRDVLKLAGTAVGMELIGNGFINNVGDAKAADLNQRRQRSEFQSKIKILLSTTIKAKPELVPSLLKLALNDAMTYDKATKSGGANGSIRFSSELSRAENEGLSDGLSLIEEVKKEIDSISKGGPISYADIIQLAGQSAVKFTYLASAIRKCGGNEEKGNLLYTAYGSAGQWGLFDRNFGRSDATEADPEGRVPQWGKATVQEMKDKFIAVGLGPRQLAVMSAFLGPDQAATEQLLATDPQVAPWVQKYQRSRETVSQTDYEVDLITAFTKLSCLGQQINFEAYTYPVERINLSKLKL
>AT4G32320.1	PF00141	ascorbate peroxidase 6 | chr4:15602777-15605234 FORWARD LENGTH=329	>AthAPX4.3	MTTTTASLVKTFLFRCDSFSSFKFKCKFESPAKTRLLSPATEKHVVRSSRAWRIRCLSDDPGSSHVFVASRRKMVVLLSTVQLLSHMLPQNGNAAEIYPVMQNEIRKVVTKGKAAGVLRLVFHDAGTFELDDHSGGINGSIAYELERPENIGLKKSLKVLAKAKVKVDEIQPVSWADMISVAGSEAVSICGGPTIPVVLGRLDSAQPDPEGKLPPETLSASGLKECFKRKGFSTQELVALSGAHTIGSKGFGDPTVFDNAYYKILLEKPWTSTSKMTSMVGLPSDHALVQDDECLRWVKRYAEDQDKFFEDFTNAYIKLVNSGAKWNML
>AT4G35000.1	PF00141	ascorbate peroxidase 3 | chr4:16665007-16667541 REVERSE LENGTH=287	>AthAPX4.4	MAAPIVDAEYLKEITKARRELRSLIANKNCAPIMLRLAWHDAGTYDAQSKTGGPNGSIRNEEEHTHGANSGLKIALDLCEGVKAKHPKITYADLYQLAGVVAVEVTGGPDIVFVPGRKDSNVCPKEGRLPDAKQGFQHLRDVFYRMGLSDKDIVALSGGHTLGRAHPERSGFDGPWTQEPLKFDNSYFVELLKGESEGLLKLPTDKTLLEDPEFRRLVELYAKDEDAFFRDYAESHKKLSELGFNPNSSAGKAVADSTILAQSAFGVAVAAAVVAFGYFYEIRKRMK
>AT4G35970.1	PF00141	ascorbate peroxidase 5 | chr4:17028651-17030205 FORWARD LENGTH=279	>AthAPX4.5	MAVNVDAEYLKEIEKTRRDLRALISSRNCAPIMLRLAWHDAGTYDAKKKTGGANGSIRFKEELNRPHNKGLEKAVAFCEEVKAKHPRVSYADLYQLAGVVAVEVTGGPAIPFTPGRKDADSADDGELPNPNEGASHLRTLFSRMGLLDRDIVALSGGHTLGRAHKERSDFEGPWTQDPLKFDNSYFVELLKGETPGLLQLKTDKALLDDPKFHPFVKLYAKDEDMFFKAYAISHKKLSELGFNPPRRIPSAVTQQTLGIAVAAAVVIFTICYEASRRGK

## Sheet: Cicer arientinum
>cicar.CDCFrontier.gnm1.ann1.Ca_12653.1 locus=Ca5:44032407:4403	44032407	44039858	+	Ca_12653.1	>CarAPX5.2	MAERVLLTPSLPLPTTRPSTTTMATISGTAAARMIPSATRATVSLSSSSRSFFSFSSSSSSVSSLQCLRSSPRISHLFLDQRRADVRVSSGRYGTASVTKALASDPDQLKSAREDIKELLRTKYCHPLMIRLGWHDAGTYNKNIEEWPQRGGANGSLRFEAELKHGANAGLVNALKLLQPIKDKYSGVTYADLFQLAGATAVEEAGGPKIPMKYGRVDVSGPEQCPEEGRLPGPPSPADHLRQVFYRMGLNDKEIVALSGAHTLGRSRPDRSGWGKPETKYTKDGPGAPGGQSWTAQWLKFDNSYFKDIKEKKDEDLLVLPTDAALFEDPSFKVYAEKYAEDQEAFFKDYAEAHAKLSNLGSKFDPPEGIVIDGSPNAEKFVAAKYSSGKRELSDAMRQ…
>cicar.CDCFrontier.gnm1.ann1.Ca_01758.1 locus=Ca5:34821584:3482	34821584	34825087	-	Ca_01758.1	>CarAPX5.1	MMCSSVSKHVVQCSIGTASGVKSQACSFRSDEHGSSSVPSSSRRGVLCIATLPCLLPLTHIFASLPANAISVTPATNEYLRIKQEVRKVLSKGKAAGVLRLVFHDAGTFQIDDTTGGMNGSIVYELERPENAGLKKSVLQKAKTQIDAIHPVSWADIISVAGAEAVEVCGGPAIQVRLGRQDSLGPDSEGKLPEETLDASGLKKCFQKKGFSTQELVALSGAHTLGSKGFGSPTSFDNSYYKVLLEKPWISSGGMPSMIGLPSDHALVEDDECLRWIKNYADNENMFFEDFRNAYVKLVNSGVRWNSL
>cicar.CDCFrontier.gnm1.ann1.Ca_11025.1 locus=Ca6:24452352:2445	24452352	24457321	-	Ca_11025.1	>CarAPX6.1	MALPVVVDAEYLKEIDKARRDLRALIANRNCAPIMLRLAWHDAGTYDAKTKTGGPNASIRNEEEFSHDANNGLKKAIDFCEEVKAKHPKISYADLYQLAGVVAVEVTGGPTVDFTPGRRDSKVSTREGRLPDAKQGVPHLRDIFYRMGLTDKDIVALSGAHTLGRAHPERSGFDGPWTEDPLKFDNSYFVGLLKEDATGLLKLPTDMALLDDPEFLKYVELYAKDEDAFFRDYAESHKKLSELGFVPSSKATSPKDGTILAQSAVGAAVTAAVVILGYLYEVHKRGK
>cicar.CDCFrontier.gnm1.ann1.Ca_14616.1 locus=Ca6:27362246:2736	27362246	27365029	+	Ca_14616.1	>CarAPX6.2	MGKSYPTVSADYQKAVEKAKKKLRGFIAEKRCAPLILRLAWHSAGTFDVKTKTGGPFGTIKHQAELAHGANSGLDIAVRLLEPLKEQFPIISYADFYQLGGVVAVEVTGGPEVPFHPGREDKPEPPPEGRLPDATKGSDHLRDVFGKAMGLSDQDIVALSGGHTIGAAHKERSGFEGPWTSNPLIFDNSYFTELLNGEKEGLLKLPSDKALLSDPVFRPLVEKYAADEDAFFADYAEAHLKLSELGFAEA

## Sheet: Cjanu cajan
cajca.ICPL87119.gnm1.Cc02	GLEAN	gene	6172405	6178551	0.999999	-	.	ID=cajca.ICPL87119.gnm1.ann1.C.cajan_05077;Name=cajca.C.cajan_05077;evid_id=C.cajan_GLEAN_10043575;Dbxref=Gene3D:G3DSA:1.10.520.10,InterPro:IPR002016,InterPro:IPR002207,InterPro:IPR010255,PANTHER:PTHR31356,PANTHER:PTHR31356:SF0,PRINTS:PR00459,Pfam:PF00141,Prosite:PS50873,Superfamily:SSF48113;Ontology_term=GO:0004601,GO:0006979,GO:0020037,GO:0055114;Note=ascorbate peroxidase 4%3B IPR010255 (Haem p…	C.cajan_05077	>CcaAPX2.1	MGVSFLSTCPSLLPLVAYDAPPSTRYQPRSVSIYCSKSISNVSDEEQFHWRRRDILHCVGATVGLELIGSSGSLAGMANAADLIQRRQRSEFQSQVRRTLFTAIKGNPDLTPSILKLALNDALTYEKATKSGGPNGSIRFSSEIGRPENTGLSAAVSLLEEAKKEIDSYAKGGPISYADLIQYAAQSAVKSTFLAAAIRKCGGNEEKGNILYNAYGSNGQWGLFDKQFGRADAQDPDPEGRVPIWEKASVQEMKDKFSAVGFGPRQVAVLSAFLGPDQSATETLLASDPDVAPWVQKYQRSRETVSQTDYEVDLITTFTKLSTLGQQINYEAYTYAPPKIDITKLKL
cajca.ICPL87119.gnm1.Cc04	GLEAN	gene	4218617	4223587	0.997609	+	.	ID=cajca.ICPL87119.gnm1.ann1.C.cajan_21317;Name=cajca.C.cajan_21317;evid_id=C.cajan_GLEAN_10028925;Dbxref=Gene3D:G3DSA:1.10.420.10,Gene3D:G3DSA:1.10.520.10,InterPro:IPR002016,InterPro:IPR002207,InterPro:IPR010255,InterPro:IPR019793,InterPro:IPR019794,PANTHER:PTHR31356,PANTHER:PTHR31356:SF0,PRINTS:PR00458,PRINTS:PR00459,Pfam:PF00141,Prosite:PS00435,Prosite:PS00436,Prosite:PS50873,Superfamily:SSF48…	C.cajan_21317	>CcaAPX4.1	MALPVVVDAEYLKEVDKARRDLRALIANRNCAPLMLRLAWHDAGTYDAKTKTGGPNGSIRNEEEYSHGANSGLKKAIDFCEEVKAKHPKITYADLYQLAGVVAVEVTGGPTIDFVPGRRDSKISPKEGRLPDAKQGVPHLRDIFYRMGLNDQDIVALSGGHTLGRAHPERSGFEGPWTEDPLKFDNSYFVELLKEDYAMLLKLPTDKALLEDPNFRRFVELYAKDEDAFFRDYAESHKKLSELGFVPSSRATCVKDGTILAQGAVGVVVTAAVVILSYLYEVRKRGK
cajca.ICPL87119.gnm1.Cc04	GLEAN	gene	5454415	5459095	0.583685	+	.	ID=cajca.ICPL87119.gnm1.ann1.C.cajan_21451;Name=cajca.C.cajan_21451;evid_id=C.cajan_GLEAN_10029063;Dbxref=Coils:Coil,Gene3D:G3DSA:1.10.420.10,Gene3D:G3DSA:1.10.520.10,InterPro:IPR002016,InterPro:IPR002207,InterPro:IPR010255,InterPro:IPR019793,InterPro:IPR019794,PANTHER:PTHR31356,PANTHER:PTHR31356:SF0,PRINTS:PR00458,PRINTS:PR00459,Pfam:PF00141,Prosite:PS00435,Prosite:PS00436,Prosite:PS50873,Superf…	C.cajan_21451	>CcaAPX4.2	MGKSYPTVSADYQKAVDKAKKRLRGLIAEKRCAPLMLRIAWHSAGTYDVKTKGGXPAELAHGANNGLDIAVRLLEPVKAEFPILSYADFYQLAGVVAVEVTGGPEIPFHPGREDKPEPPPEGRLPDATKGSDHLRDVFGKAMGLSDQDIVALSGGHTLGSCHKERSGFEGPWTTNPLIFDNSYFKELLSGEKEGLIQLPTDKSLLSDPVFRPLVEKYAADEDAFFADYAESHLKLSELGGKGKKRKGEKGREEGCNRRKRRRSDGGRDRQRRHDRRRRRATGLRKGEEEKKRRKRKREEEEEEEKKEKKKSNTIGGMMGGPTRRRRSGVMREEEKNKRKRRRRRRRNVPEKKEKVEKNERNTYLLIIYFINY
cajca.ICPL87119.gnm1.Cc06	GLEAN	gene	15931379	15941200	0.209775	-	.	ID=cajca.ICPL87119.gnm1.ann1.C.cajan_12522;Name=cajca.C.cajan_12522;evid_id=C.cajan_GLEAN_10039112;Dbxref=Gene3D:G3DSA:1.10.420.10,Gene3D:G3DSA:1.10.520.10,InterPro:IPR002016,InterPro:IPR002207,InterPro:IPR010255,PANTHER:PTHR31356,PANTHER:PTHR31356:SF0,PRINTS:PR00458,PRINTS:PR00459,Pfam:PF00141,Prosite:PS50873,Superfamily:SSF48113;Ontology_term=GO:0004601,GO:0006979,GO:0020037,GO:0055114;Note=asc…	C.cajan_12522	>CcaAPX6.1	MAGVNPNGVADFPAVPTHGGQFIQYNIFGNLFEVTTKYRPPIMPIGRGAYGIVCSLLNTETNELVAVKKIANAFDNHMDAKRTLREIKLLRHLDHENVIGLRDVIPPPLRREFNDVYIATELMDTDLHHIIRSNQGLSEEHCQRMLLYLQYFLYQILRGLKYIHSANIIHRDLKPSNLLLNSNCDLKIIDFGLARPALESDFMTEYVVTRWYRAPELLLNSSDYTAAIDVWSVGCIFMELMNKKPLFPGKDHVHQMRLLTELLGTPTDADLGLMRNEDARRYIKQLPQYPRQPLGQVFPHVHPAAIDLVDKMLTIDPNKRITVEEALAHPYLEKLHDVADEPICMEAFSFEFEQQQLDEEQIKEMIYREALALNPEYA
cajca.ICPL87119.gnm1.Cc06	GLEAN	gene	15943082	15945697	0.705924	-	.	ID=cajca.ICPL87119.gnm1.ann1.C.cajan_12523;Name=cajca.C.cajan_12523;evid_id=C.cajan_GLEAN_10039113;Dbxref=Gene3D:G3DSA:1.10.420.10,Gene3D:G3DSA:1.10.520.10,InterPro:IPR002016,InterPro:IPR002207,InterPro:IPR010255,PANTHER:PTHR31356,PANTHER:PTHR31356:SF0,PRINTS:PR00458,PRINTS:PR00459,Pfam:PF00141,Prosite:PS50873,Superfamily:SSF48113;Ontology_term=GO:0004601,GO:0006979,GO:0020037,GO:0055114;Note=asc…	C.cajan_12523	>CcaAPX6.2	MALVDEEYLEEIEKARRQLRLLITINKCAPLMLRLAWNDACTYDAQTRTGGANASIRTPQELKHQANIGLERAVRLCEEVKAKLKKVSYADLYQLAGVVAIELTGGPTINFYPGRQDSDECPPEGRHLSGEEDAKSLRNTFSRMGLRDDKHIVALCGGVRTISYTKGPYGQWTKDPLKFDNSYFVLPMDDALVKDEKFRHFVELYAKDEDTFFKDYAMSHEKLSELGCNLKKPNQPKGSFEKLNQPKGLIGIGLVSLVVTVILGYLMKKRKKNQLKVEEDLDTNL
cajca.ICPL87119.gnm1.Cc06	GLEAN	gene	15948814	15950981	0.999867	-	.	ID=cajca.ICPL87119.gnm1.ann1.C.cajan_12524;Name=cajca.C.cajan_12524;evid_id=C.cajan_GLEAN_10039114;Dbxref=Gene3D:G3DSA:1.10.420.10,Gene3D:G3DSA:1.10.520.10,InterPro:IPR002016,InterPro:IPR002207,InterPro:IPR010255,InterPro:IPR019793,InterPro:IPR019794,PANTHER:PTHR31356,PANTHER:PTHR31356:SF0,PRINTS:PR00458,PRINTS:PR00459,Pfam:PF00141,Prosite:PS00435,Prosite:PS00436,Prosite:PS50873,Superfamily:SSF48…	C.cajan_12524	>CcaAPX6.3	MVKATVGGEYLKEFEKARRDLRALISNRNCAPLMLRLAWHDAGTYDAKTKTGGPNGSIRTEEELNHAANKGLRTAVEFCEEVKAKHPKVSYADIYQLAGVVAVEVTGGPTIDFLPGRKDSLESPAEGRLPDAKQGASHLREIFYRMGLGDRDIVALSGGHTLGKAHKDRSDFHGQWTKDPLKFDNSYFVELLKGDSKDLLKLPTDKALVEDLKFRKYVELYAKDEDAFFADYASSHKKLSELGFNVKDRSMLVKGAIGIAIALTAVILGYLRELNINKTS
cajca.ICPL87119.gnm1.Cc11	GLEAN	gene	34240391	34246726	0.0161414	+	.	ID=cajca.ICPL87119.gnm1.ann1.C.cajan_03105;Name=cajca.C.cajan_03105;evid_id=C.cajan_GLEAN_10049809;Dbxref=Gene3D:G3DSA:1.10.420.10,Gene3D:G3DSA:1.10.520.10,InterPro:IPR002016,InterPro:IPR002207,InterPro:IPR010255,InterPro:IPR019793,PANTHER:PTHR31356,PANTHER:PTHR31356:SF2,PRINTS:PR00458,PRINTS:PR00459,Pfam:PF00141,Prosite:PS00435,Prosite:PS50873,Superfamily:SSF48113;Ontology_term=GO:0004601,GO:000…	C.cajan_03105	>CcaAPX11.1	MAAASVTAPPSVVSGFSKETPSELAMVVSRNGKDLVEVIKELDDYFLKAADAGSHVSLLLEVPSSGFSDRSKACKVHSYGWSLSPSSWAWGSSPKLNGFGKLAEATPVSVGAFGANGVGTVGHCSTVERLYAWEKKLYQEVKNAKTIKMEHEKKLALLRKVELKRADYVKTEKTRKEVEKLESQMMVASQAIDSTSAEINKLREVELYPQLIELVKGLMCMWRSMYECHQVQRHIVQQLEYLNTIPSNNPTSEIHRQSTLQLELEVQQWHQSFCNLFKAHRDYIQSLTGWLRLSLFQFSKNPLSRTPEESKIYTLCEEWHLAVDRIPDTAASEGIKSLLTVIHAIVVQQAEEHKQKKKSDSAFKELEKKVVQLRSLECKYGPYSMPESLRSNKDPVTEK…

## Sheet: G. max
				start	end	Chromosome	Orientation	Genome	CDS		Protein
glyma.Zh13.gnm1.ann1.SoyZH13_01G148000	glyma.Zh13.gnm1.ann1.SoyZH13_01G148000	SoyZH13_01G148000	ascorbate peroxidase 3; IPR010255 (Haem peroxidase); GO:0004601 (peroxidase activity), GO:0006979 (response to oxidative stress), GO:0020037 (heme binding), GO:0055114 (oxidation-reduction process)	53068581	53073045	1	+	ATGCACGGTGCAGGGCAAGATATACCCAAAGGGCCAGTGCCAGATCAGATGGACGGTTGGGGGATATCCTCCAAGAATTTTAAAACTGTGTATTTGGAATTTTGGATTCAAAGAGTAGGGATCTCAACATATTCGCTAATATATTTTATATTATTATTAACTAAAATATATTAAAATTACAAGCATAAGCATAACTTCATCAAAGTAAAACTTAAAATTGTGTGATTTTCAGTATAATCAATAATAAGGAATACACTAAAAAAATAATAGTAAAGAGTAGTAGTATATTAAAAGAACATATATATATATATATATATATTACTATAGCATCATTTACCTTCGATCCAAAGGTTATTTTAGTAGATATATTATATTCATGTAATAAAATTATATAGTAAT…	ATGCACGGTGCAGGGCAAGATATACCCAAAGGGCCAGTGCCAGATCAGATGGACGGTTGGGGGATATCCTCCAAGAATTTTAAAACTGTTTTAATCCTCACTGCTTTAGTTTTGGTTTCTTTGGAGAGAATAGAGGAAGTGAAGGCCAAATATCCAAAAGTTTCATATGCCGACCTTTACCAGCTAGCTGGTGTTGTTCCAGTAGAGGTCACTGGGGGTCCAACTATGGACTTTGTTCCAGGGAGAAAAGATTCATTGGAATCTCCAGTAGAAGGGTGTCTTCCGGATGCCGAACAAGGATTGAGAGTAAGTTTAAACATTTACTTAGTGAATCCCTTCCTATCCGGAGGTCACACTTTGGGTAAGGCACATAAAGATCGTTCTGACTTTCATGGTCAA…	>GmaAPX1.1	MHGAGQDIPKGPVPDQMDGWGISSKNFKTVLILTALVLVSLERIEEVKAKYPKVSYADLYQLAGVVPVEVTGGPTMDFVPGRKDSLESPVEGCLPDAEQGLRVSLNIYLVNPFLSGGHTLGKAHKDRSDFHGQWTKDPLKFDNSYFVELLRGESKDLLKLPTDKALVEDPNFRKYVELYAKDEDAFFADYATSYKKLRARLHFQESSFHIGQGSYRNCYCLNRCDLGLLT
glyma.Zh13.gnm1.ann1.SoyZH13_01G148100	glyma.Zh13.gnm1.ann1.SoyZH13_01G148100	SoyZH13_01G148100	ascorbate peroxidase 3; IPR010255 (Haem peroxidase); GO:0004601 (peroxidase activity), GO:0006979 (response to oxidative stress), GO:0020037 (heme binding), GO:0055114 (oxidation-reduction process)	53076021	53079776	1	+	ATGGCGGAACCTGTTGTTGACGACGAATATCTCAAGGAAATAGACAAGGCTCGACGTGAACTTCGCGCTTTCATCACCAGCAACCAATGCGCTCCTCTCATGCTTCGATTAGCGTACATCACTCACTACTGCTTTCATTTCTTAACTTCTGAAGTAACATGTCAATAAGTCCTTTTAAAAGATTCCTTTCCTTTTTTCATCCATGACAATTTGAAATAATTTACATATCTGATTTAACTATTTAAATTCCTTTAATGTAACATATAGATTTTAAAAAAAAAAACAACTTAAAGAATGTAATAACTTATTTTTAAAAGACTTTTATAATCAATGTTTTGTAATTTAAATTTTAATGGAGTTATATATTATAAGAATTTATAAGATTTGAAATGACTTACA…	ATGGCGGAACCTGTTGTTGACGACGAATATCTCAAGGAAATAGACAAGGCTCGACGTGAACTTCGCGCTTTCATCACCAGCAACCAATGCGCTCCTCTCATGCTTCGATTAGCGTGGAACGATGCTGCCACCTACGATGCCAGAAACAGAGCAGGAGGCCCCAACGGTTCTATCAGGACTGATAAAGAGTTGAAACACGAAGCAAACGAGGGATTGTTAAAAGCAACTCAATTATGTGAGCATGTGAAGGCCAAACTTAAAAAAGTTTCATACGCAGACCTTTACCAGCTAGCTGGTGTTGTTGCAATAGAGGTCTCTGGGGGTCCAACTATTGAATTTTTGCCTGGGAGAAAAGATTCAATGGAATCTTCAGCAGAAGGGCTTCTTCCAGATGTCAAA…	>GmaAPX1.1	MAEPVVDDEYLKEIDKARRELRAFITSNQCAPLMLRLAWNDAATYDARNRAGGPNGSIRTDKELKHEANEGLLKATQLCEHVKAKLKKVSYADLYQLAGVVAIEVSGGPTIEFLPGRKDSMESSAEGLLPDVKQGASIIRNIFSRMGISDDKHIVALCGGLTWGETLKDRSDSKGQWPKDPLKFDNSYYKKILSKDLSSRLPIEDALLTDQSFRRHVEEYSKDENSFFKEYAMSHKKLSELGYNLKKQNQSKVPDEEQNQPKGPYEKLNQHRGLIGIGIVSVVTVILGYLLKRKKNQLKK
glyma.Zh13.gnm1.ann1.SoyZH13_02G190600	glyma.Zh13.gnm1.ann1.SoyZH13_02G190600	SoyZH13_02G190600	ascorbate peroxidase 4; IPR010255 (Haem peroxidase); GO:0004601 (peroxidase activity), GO:0006979 (response to oxidative stress), GO:0020037 (heme binding), GO:0055114 (oxidation-reduction process)	42405706	42411803	2	-	GTGAACACTCTTAATTATCTCACTGTATGTGCATGAATAATTACATAGAAGCTCAAAGTTTCAAGTTAAAAAAACAAAAAGAGAATAATTATAAACAAGTCAAAACTTGAAATGTCTTGAGGAGGAAGATAATATGGTACTACCATATGTGTCTTACTTTTACAATTTGAGTTTGGTAATGTCGATCTTTGGGGGAGGATATGTATATGCCTCATAGTTGATTTGTTGGCCCAAGGTACTCAGTTTTGTGAAAGTGGTTATCAGGTCAACCTGAAAAAAAGAGAGTAAAGAAACCAAAGAAAACAACAAAGTGAATTTTCAAACAAACAAAAGCTTAAGGAACTTCATTGCTGTCCATGGATGGAGCTATTCATAGATAAACTTACCTCATAATCTGTC…	ATGGGTGTCTCCTTCCTCTCAACTTGCCCTTCTCTGCTTCCACTCGTTGCTTATGATACACCACCCTCCGCCAGATACCAACCTCGTTCAGTGTCCATTTGTTGTAATAAAACCATAAGCGATGTTAGTGATGGAGAGCCGTTCCATTGGAGAAGGAGAGATGTTCTCAAATGCGCCGGGGCAACCGTTGGCCTGGAATTAATTGGAAGCTCCGGATCTCTTGTTGAAATGGCTAATGCTGCTGACCTGATACAGCGCAGACAGCGTTCTGAATTTCAATCTAAGATTAAGGAAACACTTTTTACAGCCATAAAGGGAAATCCTGATCTTATTCCATCCTTACTGACACTGGCTCTAAATGATGCTTTGACTTATGATAAGGCAACAAAATCAGGTGGT…	>GmaAPX2.1	MGVSFLSTCPSLLPLVAYDTPPSARYQPRSVSICCNKTISDVSDGEPFHWRRRDVLKCAGATVGLELIGSSGSLVEMANAADLIQRRQRSEFQSKIKETLFTAIKGNPDLIPSLLTLALNDALTYDKATKSGGPNGSIRFSSEIGRPENTGLSAALNLLEEAKKEIDSDSKGGSISYADLIHIAAQSAAKATFLAAAIRKCGGKEEKGKTLYNAYGSNGQWGLFDRQFGRADAQDPDPEGRVPLWEKASVQEMKDKFVAVGFGPRQLAVLSAFLGPDQNATETLLASDPDVAPWVQKYQRSRETVSQTDYEVDLITTFTKLSTLGQQINYEAYTYPPPKIDITKLKL
glyma.Zh13.gnm1.ann1.SoyZH13_03G095100	glyma.Zh13.gnm1.ann1.SoyZH13_03G095100	SoyZH13_03G095100	ascorbate peroxidase 2; IPR010255 (Haem peroxidase); GO:0004601 (peroxidase activity), GO:0006979 (response to oxidative stress), GO:0020037 (heme binding), GO:0055114 (oxidation-reduction process)	32024401	32028216	3	+	ATGACACCTGTCCATTTTATTGGCTTTTTGGTCATTTTATGCCCCTTCAACTTTGCCTTGATTTTGTGCTGCGTTTTATGCCACGTTGAGTGTTTAGCTTTGGCCATTCTGTTGGTGATGCACGTGGCTTCTTCTCCAGCGTTTCCGATCATTTCCCTACCAACTTCAAACCTGCTTCCTTCATTTGTGTCATTTCCCCACCAATTTGTTTCCTCTGTTTCCATTCTTTCTTCTTCATTTTGGTGTCTTCTTCAGTTCCACTTTTTTCTTTTGTTTTCGGTTGAGTTTTAGAGCTGCTGAGGGCTTCCATCTTCATTCTATTCTTTGCGATTTTGGTTTGGGTTCTTTTTCTTTGATTGGTCTGATTTTTTGTGGTTTTATTTTTGGGACATGTTACAG…	ATGACACCTGTCCATTTTATTGGCTTTTTGGTCATTTTATGCCCCTTCAACTTTGCCTTGATTTTGTGCTGCGTTTTATGCCACGTTGAGTGTTTAGCTTTGGCCATTCTGTTGGTGATGCACGTGGCTTCTTCTCCAGCTAACAACGACGGCTTTGGCAAAGAAGTTGTTGGAGAAGTTAAGAAGAAGATAGAGTGGCTGAAAGAGGCATGGATTCTGGGTCAAGATGTTTCTGCTGGGTTCACTTCAACCATGTATACTGTTCTTTTCCCTCACTTCTGGCTCCCGCTGTGTGCTCTGCTTCACACTACTGGGATACCAAAGATACCACTAGATCATCAGAGAAAAATTCAATTGAAAAAGAGATTGAAACTTAAACTGCTGAAGCGCAAACAGCAG…	>GmaAPX3.1	MTPVHFIGFLVILCPFNFALILCCVLCHVECLALAILLVMHVASSPANNDGFGKEVVGEVKKKIEWLKEAWILGQDVSAGFTSTMYTVLFPHFWLPLCALLHTTGIPKIPLDHQRKIQLKKRLKLKLLKRKQQLPEESRTCDGEFMVEMMLEENFCLMERSLLTQWQMIWNSQCSLKLIKMCTFFVAKLPFLILKTYHLQTVTDSWIENAVNGLMGKQIIRKNGRIKFLVDILLGLKFSMSGNFVQIVENLWIIKGIDLEYVNKEVGGSSALEKDIKAQGHASITSREGHSIGTFDKCTKTGGPFGTIKHPAELAHSANNGLDISVRLLEPLKAEFPILSYANF
glyma.Zh13.gnm1.ann1.SoyZH13_04G128100	glyma.Zh13.gnm1.ann1.SoyZH13_04G128100	SoyZH13_04G128100	ascorbate peroxidase 2; IPR010255 (Haem peroxidase), IPR011990 (Tetratricopeptide-like helical); GO:0004601 (peroxidase activity), GO:0005515 (protein binding), GO:0006979 (response to oxidative stress), GO:0020037 (heme binding), GO:0055114 (oxidation-reduction process)	26589564	26593679	4	-	CTATCCTTGCCGGAATGTGAAAGCCTAAAAATTGATATACCCAAAGTGAGAATAAAAAAATGCAGAATCTTAGAAAAATAAACATTAAAACACAAAAAAAGAATTTTGTTTTAATTAATATAATTTTCTGTTTTCATCAAGCAAGAGCTATGAACAGATTGCTACTTGAGAAATTCTTCTTCCACCATCTTAGTAACTATGCATGCAGCTCATCAATAACACTTGATCAAGACACATGGTTCCACGTCTCTGACTCTAAAATGCTAACAAAAACTTCCAAAAAAAATATTACATCATCATACTTGATCAAGTAGGAGAAAAAACATAATAAAATAGAATCCATCAATAAAGCCACAATTGCATGAAATTTGAATTCCAAAAAAAATAAAAAATATGTGA…	ATGTACCCAAAAAATCATCATTTTCACATCTCACTCAACCCTCTTCTCTCCCCTCTCATCAAACCCATCTGCATCCACTCTCCCCCTGTCGCATTCACATCGACGTCGCTTGTTCCACCAAAATCTGCCAAGTATGAAACTCTCCCCAACGAAAGCACCACCGAGGAGCAACTTCACACCACCGATGCCGACGCGCTTCAATTGCTCCTACAAACCAAGATCAGAGCCCTCGAAATCAACGAAGCAATTCACATTTTAGACCGTCTAATCGAGCTCGAGCCCAAGGAGTCCAAGTACTCACTCCTAAAGGCGCACCTGCACATGCACTACGGTGAGCACAAACTCACCACGAACGTGTTCGAGGAATTGATTCATAGAGACTCGTTCCACGTGGAGGCC…	>GmaAPX4.1	MYPKNHHFHISLNPLLSPLIKPICIHSPPVAFTSTSLVPPKSAKYETLPNESTTEEQLHTTDADALQLLLQTKIRALEINEAIHILDRLIELEPKESKYSLLKAHLHMHYGEHKLTTNVFEELIHRDSFHVEAYRSLLMLTSGTNKPMEELLKRIKEKAVEKTKKLRGFIAEKRCAPLMLYGTLLEPLTRAQTLVDPSDIAIRLLESLKAEFPILSYADFYPLAGIVAMEVTGGPEVPFHPGRELKNRSSKHGIDECFWEIVPLKEVFQTLRCDSNGLTSHNSICRKAFTFRQG
glyma.Zh13.gnm1.ann1.SoyZH13_04G223500	glyma.Zh13.gnm1.ann1.SoyZH13_04G223500	SoyZH13_04G223500	ascorbate peroxidase 3; IPR010255 (Haem peroxidase); GO:0004601 (peroxidase activity), GO:0006979 (response to oxidative stress), GO:0020037 (heme binding), GO:0055114 (oxidation-reduction process)	52362952	52368952	4	-	CACAACAAGTAAAGATTACATTATTTATTAATTCAATAATACGCTATTTTCAAGTGATTATTTTGGCTCAATCAATAAATTACTTGCTGCCATATGTAAAAGTTAGAACAAGTGTGCAAAATGCCAATGCAATTATAGTAAAAATCAGAAGAACAAAATCCAACTAGTTTCCAAGCAGTGATGTCAAAAATGCCAAAACAGCAATAATAATTATGATATTTAGAAAATAGTTTGACTGTAGAGGCTTATCTGGGCTTCCACCAATCGCCTCATATTCAGCCCGTATCTTCTGCTTCATACCGTCAGACAGTTCTCTCTGCAATTCAAATAGGCACACTATTGAATTTATTCCTTTCTTCTTCATTTAAAACTTCCATATTTTACATGTGATATCACGTG…	ATGGCAGAGCGTGTGTCATTGCCTTTACCATCTCAGTCTCAACTCTCTCCAACAACCACAATGGCTCTCTTGGGCGCCGCCTCCTCCTCCGCTCGCATCATTCCCTCCGTCTCACTCTCTTCCTCTTCTCGCTCCTTCTTCTCACTCTCATCCTCTTCTTCCAAACTCCAATGCTTGCGCTCCTCTCCTCGTATTTCGCACCTCTTTCTCAATCAGCGAAGAGCGGAGGTTCGCGTTTCGAGTGGAGGATACGGAACTGTGTCGGCACCGAAGTCAGTTGCGTCTGATCCTGATCAGTTGAAGAGCGCCAGAGAAGATATCAAGGAGCTTCTCAACTCCAAGTTCTGCCATCCTATTCTCATTCGTTTGGGATGGCATGATGCTGGTACTTATAATAAG…	>GmaAPX4.1	MAERVSLPLPSQSQLSPTTTMALLGAASSSARIIPSVSLSSSSRSFFSLSSSSSKLQCLRSSPRISHLFLNQRRAEVRVSSGGYGTVSAPKSVASDPDQLKSAREDIKELLNSKFCHPILIRLGWHDAGTYNKNIEEWPQRGGANGSLRFEIELKHGANAGLVNALKLLQPIKDKYSGVTYADLFQLAGATAVEEAGGPKIPMKYGRVDVSGPEQCPEEGRLPDAGPPSPADHLRQVFYHMGLNDKEIVALSGAHTLGRSRPDRSGWGKPETKYTKDGPGAPGGQSWTVQWLKFDNSYFKDIKEKKDEDLLVLPTDAALFEDPSFKVYAEKYAEDQEAFFKDYAEAHAKLSNLGAKFDPPEGIVIDDSPNAGAEKFVAAKYSTGKE
glyma.Zh13.gnm1.ann1.SoyZH13_06G109600	glyma.Zh13.gnm1.ann1.SoyZH13_06G109600	SoyZH13_06G109600	ascorbate peroxidase 3; IPR010255 (Haem peroxidase); GO:0004601 (peroxidase activity), GO:0006979 (response to oxidative stress), GO:0020037 (heme binding), GO:0055114 (oxidation-reduction process)	9291175	9297616	6	+	ATGGCAGAGCGTGTGTTACTCCTCACTCCATCTCAGTCTCATCACTCTCCAACCACAATGGCTGTCTTGGGCGGCGCCGCCTCCGCTCGCATCATTCCCTCCGTCTCACTCTCCACCTCTTCTCGCTCCTTCTTCTCCTTATCATCCTCTTCCAAACTCAAATGCTTGCGCTCCTCTCCTCGCATTTCGCACCTCTTTCTCAATCAGGTTTTGCCTCGTTCTCTATCTCTGATTACTGCGATTCTGATTGTTTATGAAATTTGAGCTTGTTTGCATGAATTGCGCGTGTATTTTTTTTTTTATTTCAGCAAAGAGCGGAGGTTCGCGTTTCGAGTGGAGGATACGGAACGGTATCGGCGCCGAAGTCCGTTGCGTCTGATCCTGATCAGTTGAAGAGCG…	ATGGCAGAGCGTGTGTTACTCCTCACTCCATCTCAGTCTCATCACTCTCCAACCACAATGGCTGTCTTGGGCGGCGCCGCCTCCGCTCGCATCATTCCCTCCGTCTCACTCTCCACCTCTTCTCGCTCCTTCTTCTCCTTATCATCCTCTTCCAAACTCAAATGCTTGCGCTCCTCTCCTCGCATTTCGCACCTCTTTCTCAATCAGCAAAGAGCGGAGGTTCGCGTTTCGAGTGGAGGATACGGAACGGTATCGGCGCCGAAGTCCGTTGCGTCTGATCCTGATCAGTTGAAGAGCGCTAGAGAAGACATCAAGGAGCTTCTCAACTCCAAGTTCTGCCATCCTATTCTCATTCGTTTGGGATGGCATGATGCTGGTACATATAATAAGAATATTGAG…	>GmaAPX6.1	MAERVLLLTPSQSHHSPTTMAVLGGAASARIIPSVSLSTSSRSFFSLSSSSKLKCLRSSPRISHLFLNQQRAEVRVSSGGYGTVSAPKSVASDPDQLKSAREDIKELLNSKFCHPILIRLGWHDAGTYNKNIEEWPLRGGANGSLRFEVELKHGANAGLLNALKLLQPIKDKYSGVTYADLFQLASATAVEEAGGPKIPMKYGRVDVSGPEQCPEEGRLPDAGPPSPADHLRQVFYRMGLNDKEIVALSGAHTLGRSRPDRSGWGKPETKYTKDGPGAPGGQSSTVQWLKFDNSYFKDIKEKRDEDLLVLPTDAALFEDPSFKVYAEKYAEDQEAFFKDYAEAHAKLSNLGAKFDPLEGIVIDDSPNAGGEKFVAAKYSTGKSELSDSMKQKIRAEYEA…
glyma.Zh13.gnm1.ann1.SoyZH13_10G083500	glyma.Zh13.gnm1.ann1.SoyZH13_10G083500	SoyZH13_10G083500	ascorbate peroxidase 2; IPR001944 (Glycoside hydrolase, family 35), IPR010255 (Haem peroxidase); GO:0004601 (peroxidase activity), GO:0005975 (carbohydrate metabolic process), GO:0006979 (response to oxidative stress), GO:0020037 (heme binding), GO:0055114 (oxidation-reduction process)	11711724	11716637	10	+	ATGGGTTCTTCCCCTGAGCCCATCAATTTCAGGTTTTTTTCTCTTTTTCTTCTAACAAGTTATTTGTAGAAATGCTTCCGTGCAACTAAGACGATGATAATAATAATAATAATAATTTGTTATGACTGAAATAAATAAAATTTGTTAGCAGGAAGTTGGAGACTCCGTCCATGTCTCACTGGAGACTCTCAATGAACGAAAGTAGCAAGCCACCATTTAAATGATACGACCAGTTTAGTGCAATAGCTTTTAATTTTGTGTTCGGTAACCATTTATTTTTGTTAGCTTTTTTAGGCTTTTTATGAAGAAAAATAGTTCAACAAATAGTACATATTAAAAAAAAAAAAGATGGTATACGTAAGAAACCTTTTTTTGAGTGTAGCGAATACAAAATCCACA…	ATGGGTTCTTCCCCTGAGCCCATCAATTTCAGTCTCATGGTGGCACTAACTCCGATAGAAAAGGGTCCATACATTACCACATCATATGATTATGATTATGATGCTCCTTTGGATGAATATGGTAACATTGTCCAACCAAAATGGGGTCACCTCAATGAACTTCACAGTGCTTTGAAGGCAATGGAGGAAGCTCTTACAAGTAGGAACGTAACCGAGACTGATGTAGGCAACTCTGTTAAGGTAAATGAAAGACTTGATGTCAAGCACGATGATCCAGTTTGGGGTGAAAATGTGACTCTTAGGATTAACAATGGCAACCATGTAATTCATGCATTCGTCAATGGAGAACATATTGATTCCCATTGGGCCACATATGGTATTCACAACGATAAATTTGAC…	>GmaAPX10.1	MGSSPEPINFSLMVALTPIEKGPYITTSYDYDYDAPLDEYGNIVQPKWGHLNELHSALKAMEEALTSRNVTETDVGNSVKVNERLDVKHDDPVWGENVTLRINNGNHVIHAFVNGEHIDSHWATYGIHNDKFDSKIKLKHGTNTISLLSVTVGLQKDVEKAKKLRGFIAEKRCAPLMLCLVSLLFTIEFMDYRFDAFWCVSCAYGTLLEPLTRAQTPVDPSDIAIRLLEPLKAEFPILSYADFYPLAGVVAVEIMGGPEVPFHPGRESTQIGNQLNITTMGEVTCFLFQILALWRINNSYALDFAVDR
glyma.Zh13.gnm1.ann1.SoyZH13_11G076100	glyma.Zh13.gnm1.ann1.SoyZH13_11G076100	SoyZH13_11G076100	ascorbate peroxidase 3; IPR010255 (Haem peroxidase); GO:0004601 (peroxidase activity), GO:0006979 (response to oxidative stress), GO:0020037 (heme binding), GO:0055114 (oxidation-reduction process)	5894217	5896422	11	-	TCAATTGGTTTTTTTGTTCAGTTCACGTAAGTAACCCAAGATCACCGCGGTTAAGACAATAGCAATTCCTATAACTCCCTTGGCCAATATGGAACGATGATTCTTGAAAATAAAGCCCAGCTCTGAGAGTTTTTTGTGTGAGGTTGCATAATCTGAGAAAAAAGCATCTTCATCCTACATAGTACAATTGAAAATTATTAGTGTGAACCAAAATTCTTTTTATTATTATATTGATAAAAAAAATAGTGACAGTAAAATGTTTTCAACTCTTTGTCTGTAGTTACCTTCGCATATAGTTCAACATACTTGCGGAAATTAGGATCTTCAACTAGAGCCTTGTCTGTGGGAAGCTTCAGTAAATCTTTTGACTCCCCTCTCAGCAATTCCCTGTTTAGTGTT…	ATGGCAAAGCCTAGAGTTGATGCTGAGTATCTGAAGGAAATCGAGAAGGCTCGTCGTGACCTTCGCGCTCTTATCTCCAACAGAAACTGCGCCCCTCTCATGCTTCGATTAGCGTGGCATGATGCTGGTACTTACGATGCTAAAACAAACACAGGAGGCCCTAATGGTTCTATCAGAAACAGACAAGAGTTGAATCACGCAGCAAACAAGGGACTGGAAACAGCACTTGCCTTCTGTGAGGAAGTGAAGGCCAAACATCCAAAAATTTCATATGCCGACCTTTACCAGCTAGCTGGTGTTGTTGCAGTAGAAGTTACCGGGGGGCCAACTATTAACTTTGTTCCCGGGAGAAAAGATTCATTGGAATCTCCAGCAGAGGGGCGTCTTCCAGATGCCAAA…	>GmaAPX11.1	MAKPRVDAEYLKEIEKARRDLRALISNRNCAPLMLRLAWHDAGTYDAKTNTGGPNGSIRNRQELNHAANKGLETALAFCEEVKAKHPKISYADLYQLAGVVAVEVTGGPTINFVPGRKDSLESPAEGRLPDAKQGASHLRDIFYRMGLGDKDIVALSGGHTLGKAHKDRSDFHGQWTKDPLKFDNSYFVELLRGESKDLLKLPTDKALVEDPNFRKYVELYAKDEDAFFSDYATSHKKLSELGFIFKNHRSILAKGVIGIAIVLTAVILGYLRELNKKTN
glyma.Zh13.gnm1.ann1.SoyZH13_11G078900	glyma.Zh13.gnm1.ann1.SoyZH13_11G078900	SoyZH13_11G078900	ascorbate peroxidase 3; IPR010255 (Haem peroxidase); GO:0004601 (peroxidase activity), GO:0006979 (response to oxidative stress), GO:0020037 (heme binding), GO:0055114 (oxidation-reduction process)	6066134	6068941	11	+	ATGGTGGAACCTATTGTAGTTGACGAGGAGTATCGCAAGGAAATAGAAATGGCTCGACGAGAACTTGGCGTTTTCATCACCAACAATAAATGCGCCCCTCTCATGCTTCAATTTGCGTACCTCACACTACTTAATTACTGCTTTCATGTCTTTCTAGCTAATTCTCTCCATTGTCTCCGGTGATTCGCATAATTTTAGCGTGTTTGAATGAAATTTCATAGAATTGATTTTTGATTTAAGTGTATGTTTAATTGGACGTTAGGTTATTTAAAATTGTATTGTTTACCTAAATAAACTTTTACATGTTTGATTCTACACAATTTTATTTAAAATCAATTTTACTTACACTTATATTCAAACACACTAATATTGATTTTAAAGTGAAATGGTTTATGGTTG…	ATGGTGGAACCTATTGTAGTTGACGAGGAGTATCGCAAGGAAATAGAAATGGCTCGACGAGAACTTGGCGTTTTCATCACCAACAATAAATGCGCCCCTCTCATGCTTCAATTTGCGTGGAATGATGCTGCAACCTACGATGCCAAGAGCAGAAGAGGAGGCCCCAACGGTTCTATCAGATTAAGGATTGGACAAGAGTTGAAACACGAAGCAAACAAGGGATTGGAAAATGCAGTTCAATACTGTGAAATAGTGAAGACCAAACTTAAGCTTAAAAAAGTTTCATATGCGGACCTTTACCAGGTCACTAAGGGTCCAACTATTGACTTTGTTCCCGGCAGAAAGGATTCAAATGAGTCTCCACGAACTGAAGGGCGCTTTATAGATGGTGAAGAAGAT…	>GmaAPX11.2	MVEPIVVDEEYRKEIEMARRELGVFITNNKCAPLMLQFAWNDAATYDAKSRRGGPNGSIRLRIGQELKHEANKGLENAVQYCEIVKTKLKLKKVSYADLYQVTKGPTIDFVPGRKDSNESPRTEGRFIDGEEDARNLRKIFSRMGLSDEQDIVALCGGHTLIRTMYPKVPMGETHKDRSKFEEGKSTNKPLKFDNSYFKELLSKDASFSRLPMDYALVEDPKFHHCVERYAR
glyma.Zh13.gnm1.ann1.SoyZH13_11G104300	glyma.Zh13.gnm1.ann1.SoyZH13_11G104300	SoyZH13_11G104300	ascorbate peroxidase 3; IPR010255 (Haem peroxidase); GO:0004601 (peroxidase activity), GO:0006979 (response to oxidative stress), GO:0020037 (heme binding), GO:0055114 (oxidation-reduction process)	8138680	8143056	11	-	ATAATGAAGTTGCTCTCAATTTGAGTACTCAGGGATGTTTTTAGTCTATTCATATAAAAGTCTGAATGTCTGTAGCATTATTCTTTATTGGTACTAAGTAAACAGAAACTGAAGCTGCAAAAATGAACCCTGTTTTGCACACTATGGGTCAGGGTCAGGGTCAGGGTCACGCAACCGTAACAGCCAAGAGATGAACAAATCCAGTTTACTTCCCTCTTTTGCGAACTTCATACAAGTAACTGAGGATCACCACTGCGGTAGCAACTACAACTCCTACAGCACCTTGTGCCAGTATGGTCCCTTCCTTAATAGAAATCGGCTTTGAACTTGGCACAAAGCCTAGCTCTGAAAGTTTCTTATGTGATTCAGCATAATCTCGAAAAAATGCATCCTCATCCT…	ATGGCGTTGCCGGTAGTCGTCGATGCAGAGTACCTCAAGGAGGTCGACAAGGCTCGCCGCGATCTCCGCGCACTCATCGCTAACAGGAACTGCGCTCCTCTCATGCTCCGATTAGCCTGGCACGATGCCGGAACTTACGATGCTAAGACCAAGACCGGTGGACCTAACGGTTCGATCCGGAACGAGGAAGAGTATTCTCACGGAGCCAATAATGGCTTGAAGAAAGCTATTGATTTCTGCCAGGAAGTGAAGGCAAAATATCCTAAAATTACATATGCAGATCTCTTCCAGCTTGCGGGTGTTGTTGCAGTTGAGGTTACTGGGGGTCCAACAATTGATTTCGTTCCTGGTAGAAGAGATTCAAAAGTATCTCCTAATGAAGGGCGGCTTCCTGATGCT…	>GmaAPX11.3	MALPVVVDAEYLKEVDKARRDLRALIANRNCAPLMLRLAWHDAGTYDAKTKTGGPNGSIRNEEEYSHGANNGLKKAIDFCQEVKAKYPKITYADLFQLAGVVAVEVTGGPTIDFVPGRRDSKVSPNEGRLPDAKKGVPHLRDIFYRMGLTDRDIVALSGGHTLGRAHPERSGFDGPWTEDPLKFDNSYFVELLKEDSAGLLKLPTDKALLEDAEFRCYVELYAKDEDAFFRDYAESHKKLSELGFVPSSKPISIKEGTILAQGAVGVVVATAVVILSYLYEVRKRGK
glyma.Zh13.gnm1.ann1.SoyZH13_11G142000	glyma.Zh13.gnm1.ann1.SoyZH13_11G142000	SoyZH13_11G142000	ascorbate peroxidase 1; IPR010255 (Haem peroxidase); GO:0004601 (peroxidase activity), GO:0006979 (response to oxidative stress), GO:0020037 (heme binding), GO:0055114 (oxidation-reduction process)	11329025	11331607	11	+	TGCTCTGCTCGTGCCTCTAGGGTTATCATTTCTCCATTTCCATTTTCTCTCTCACTTTTCAAGGTTCGTTTCGTATCACTCTATTCGCCGATTCACTTCACGATCTGCATTTTGACACACTCGATGTTGACCGTTTTTTTCTTTTTTTGTTTAGAATCGTAAGCTATGGGAAAGTCTTACCCAACTGTGAGTGCTGATTACCAGAAGGCCGTTGAGAAGGCGAAGAAGAAGCTCAGAGGCTTCATCGCTGAGAAGAGATGCGCTCCTCTAATGCTCCGTTTGGCGTACGTTCTTTTTTTTTTTCTTTCTATTTAACATTAGATCACTGTTATTTACGATTGAGTTTATGGATTGTCGTTTTGACGCGTTTTGGTGCGTTTCGTGTGCAGATGGCACTCT…	ATGGGAAAGTCTTACCCAACTGTGAGTGCTGATTACCAGAAGGCCGTTGAGAAGGCGAAGAAGAAGCTCAGAGGCTTCATCGCTGAGAAGAGATGCGCTCCTCTAATGCTCCGTTTGGCATGGCACTCTGCTGGAACCTTTGACAAGGGCACGAAGACCGGTGGACCCTTCGGAACCATCAAGCACCCTGCCGAACTGGCTCACAGCGCTAACAACGGTCTTGACATCGCTGTTAGGCTTTTGGAGCCACTCAAGGCGGAGTTCCCTATTTTGAGCTACGCCGATTTCTACCAGTTGGCTGGCGTTGTTGCCGTTGAGGTCACGGGTGGACCTGAAGTTCCATTCCACCCTGGAAGAGAGGACAAGCCTGAGCCACCACCAGAGGGTCGCTTGCCCGAT…	>GmaAPX11.4	MGKSYPTVSADYQKAVEKAKKKLRGFIAEKRCAPLMLRLAWHSAGTFDKGTKTGGPFGTIKHPAELAHSANNGLDIAVRLLEPLKAEFPILSYADFYQLAGVVAVEVTGGPEVPFHPGREDKPEPPPEGRLPDATKGSDHLRDVFGKAMGLTDQDIVALSGGHTIGAAHKERSGFEGPWTSNPLIFDNSYFTELLSGEKEGLLQLPSDKALLSDPVFRPLVDKYAADEDAFFADYAEAHQKLSELGFADA
glyma.Zh13.gnm1.ann1.SoyZH13_12G031100	glyma.Zh13.gnm1.ann1.SoyZH13_12G031100	SoyZH13_12G031100	ascorbate peroxidase 3; IPR010255 (Haem peroxidase); GO:0004601 (peroxidase activity), GO:0006979 (response to oxidative stress), GO:0020037 (heme binding), GO:0055114 (oxidation-reduction process)	2425213	2430761	12	-	AATGCTAAAATTTGTATTAACATATTAGGAAGTTGCTACCAAATTGAGTATTTAGGGATAGTTTTAGTCTATTCATATAAAAAAAAGTCTGAATGGCTGTGGCATTATTCTTTATTGGTACTAAGTAAACAGAATCTGAAGCTGCAAAAATGAACCCTGTTTTCACATTATGGGTCAGGGTCACGCAAACGTAACAGCCAAGTGAAATGAACAAGTCCAGTTTACTTCCCTCTTTTGCGAACTTCATACAAGTAACTGATGATCACCACTGCGGCAGTAACTACAACTCCTACAGCACCTTGTGCCAGTATGGTCCCATCCTTAATAGAAATCGGCTTTGAACTTGGCACAAAGCCTAGCTCTGAAAGTTTCTTATGTGATTCAGCATAATCTCGAAAA…	ATGGCCTTGCCAGTGGTCGTCGACGCAGAGTACCTCAAAGAGGTCGACAAGGCTCGCCGCGATCTCCGCGCACTCATCGCTAACAGGAACTGCGCTCCTCTCATGCTTCGATTGGCCTGGCACGATGCCGGAACTTACGATGCTAAGACCAAGACTGGTGGACCTAACGGTTCGATCCGTAACGAGGAAGAGTATTCTCACGGCGCCAACAATGGCTTGAAGAAGGCTATTGATTTCTGTGAGGAAGTGAAGGAAAAACATCCTAAAATTACATATGCAGATCTCTACCAGCTTGCGGGTGTTGTTGCAGTTGAGGTTACCGGGGGTCCCACAATTGATTTCGCTCCTGGTAGAAGGGATTCAAAAATATCTCCTAATGAAGGGCGGCTTCCTGATGCT…	>GmaAPX12.1	MALPVVVDAEYLKEVDKARRDLRALIANRNCAPLMLRLAWHDAGTYDAKTKTGGPNGSIRNEEEYSHGANNGLKKAIDFCEEVKEKHPKITYADLYQLAGVVAVEVTGGPTIDFAPGRRDSKISPNEGRLPDAKKGVSHLHDIFYRMGLTDRDIVALSGGHTLGRAHPERSGFDGPWTEDPLKFDNSYFVELLKEDSAGLLKLPTDKALLEDAEFRRYVELYAKDEDAFFRDYAESHKKLSELGFVPSSKPISIKDGTILAQGAVGVVVTAAVVIISYLYEVRKRGK
glyma.Zh13.gnm1.ann1.SoyZH13_12G067000	glyma.Zh13.gnm1.ann1.SoyZH13_12G067000	SoyZH13_12G067000	ascorbate peroxidase 1; IPR010255 (Haem peroxidase); GO:0004601 (peroxidase activity), GO:0006979 (response to oxidative stress), GO:0020037 (heme binding), GO:0055114 (oxidation-reduction process)	5412074	5414947	12	-	CGCCACAAACATTTGTCCAGTAATAATAGACAAATTACTAGTTATTACGGTAAATGGTCACATACTACAAAGGGTAATAATATCGCAATCGCTGAACAATGTTATTTAACAAAAGGATCGACCACAAATAAAAACAACCCAACTCCAATCATCATCACCACGTCCAGCAAAATACATTCAAAAGCTATCTAAAAATTTGAGGAACCCACAGTGGCGCATTAGAAACCATGACCATAGAATTTATGAGAGAAATATTATGGGCACCGTGCCTCTCCAACAATCCCCAAAACGTTGCTTAGGCTTCAGCAAACCTGAGAGGCAACAGTCATGACACGAATCAGAACCACCCAATTAACAACGCAAAACATGTCAAGTAAAACGGAGAGAAAAGCTTCATAA…	ATGGGAAAGTCTTACCCAACCGTGAGCGCTGATTACCAGAAGGCCGTTGAGAAGGCGAAGAAGAAGCTCAGAGGCTTCATCGCTGAGAAGAGATGCGCTCCTCTAATGCTCCGTTTGGCATGGCACTCTGCTGGAACTTACGACGTGAGCTCGAAGACCGGTGGTCCCTTCGGAACCATAAAGCACCCCTCCGAACTCGCTCACGGCGCTAACAACGGTCTTGACATCGCTGTTAGGCTTTTGGAGCCACTCAAAGCGGAGTTTCCTATTTTGAGCTACGCCGATTTCTACCAGTTGGCTGGCGTTGTTGCCGTTGAGGTCACCGGTGGACCTGAAGTTCCCTTCCATCCTGGAAGAGAGGACAAACCTGAGCCACCACCAGAGGGTCGCTTGCCCGAT…	>GmaAPX12.2	MGKSYPTVSADYQKAVEKAKKKLRGFIAEKRCAPLMLRLAWHSAGTYDVSSKTGGPFGTIKHPSELAHGANNGLDIAVRLLEPLKAEFPILSYADFYQLAGVVAVEVTGGPEVPFHPGREDKPEPPPEGRLPDATKGSDHLRDVFGKAMGLSDRDIVALSGGHTIGAAHKERSGFEGPWTSNPLIFDNSYFKELLSGEKEGLLQLPSDKALLSDPVFRPLVEKYASDEDAFFADYAEAHQKLSELGFAEA
glyma.Zh13.gnm1.ann1.SoyZH13_14G162900	glyma.Zh13.gnm1.ann1.SoyZH13_14G162900	SoyZH13_14G162900	ascorbate peroxidase 4; IPR010255 (Haem peroxidase); GO:0004601 (peroxidase activity), GO:0006979 (response to oxidative stress), GO:0020037 (heme binding), GO:0055114 (oxidation-reduction process)	46547958	46554747	14	-	CCAAACACGCTATTAATCAGTTTAGTGGTTTGTAACAAATTTAGATCGTTTCTTGAACACTCTTAATTATCTCACTACATGTGCATGAATAATTACATAGAAGCTCAAGGTTTCCAGTTAAAAAAAAAAAGAGAAAATTTTAAAATAAGTCAAAACTTGAAATTCAAGGTCTGTCTTGAGGAGGAGGAAAATAATATGGTACTACCATATGCTTTACTTTTACAATTTGAGTTTGGTAATGTCGATCTTTGGTGGAGGATATGTATATGCCTCATAGTTGATTTGTTGGCCCAAGGTACTCAGTTTTGTGAAAGTGGTTATCAGATCAACCTATAAAAAAAAGTAAAGCAGCCAAAGAAAACACAAAGTGAATTTTCAAACCAAACAAAAGCTTCAGGA…	ATGGGTGTCTCCTTCCTCTCGACTTGCCCTTCCCTGCTTCCACTCGTTGCTTATGATACACCACCCTCCACCAGATACCAACCTCGTTCAGTGTCCATTTGTTGTAATAAAACCATAAGCAATGTTAGTGATGAAGAGCCGTTCCATTGGAGAAGGAGAGAAATTCTTAAATGCGCTGGGGCAACCGTTGGCTTGGAATTGATTGGAAGCTCCGGATCGCTTGTTGGAATGGCTAATGCTGCTGACTTGATACAGCGCAGACAGCGTTCTGAATTTCAATCTAAGGTTAAGGAAACACTTTTTACAGCCATAAAGGGAAATCCTGATCTTATCCCATCCTTACTGACACTGGCTCTAAATGATGCTTTGACTTATGATAAGGCAACAAAATCGGGTGGT…	>GmaAPX14.1	MGVSFLSTCPSLLPLVAYDTPPSTRYQPRSVSICCNKTISNVSDEEPFHWRRREILKCAGATVGLELIGSSGSLVGMANAADLIQRRQRSEFQSKVKETLFTAIKGNPDLIPSLLTLALNDALTYDKATKSGGPNGSIRFSSEIGRPENTGLSAAMNLLEEAKKEIDSYSKGGPISYADLIHFAAQSAAKATFLAAAIRKCGGNEEKGKTLYNAYGSNGQWGLFDRQFGRADTQDPDPEGRVPIWEKASVQEMKDKFVAVGFGPRQLAVLSAFLGPDQTATETLLATDPDVAPWVQKYQRSRETVSQTDYEVDLITTFTKLSTLGQQINYEAYTYPPPKIDITKLKL
glyma.Zh13.gnm1.ann1.SoyZH13_18G134200	glyma.Zh13.gnm1.ann1.SoyZH13_18G134200	SoyZH13_18G134200	ascorbate peroxidase 1; IPR002207 (Plant ascorbate peroxidase); GO:0004601 (peroxidase activity), GO:0006979 (response to oxidative stress), GO:0020037 (heme binding), GO:0055114 (oxidation-reduction process)	29784463	29788946	18	-	TCACACAGTAAGTGTTGTAAGGTTTGCTATGGTGGTGTTTTGCGGGTTTGAGTTTGTGTTTCTGTTTCAGGTTTTCATTTTTCATTCCAAAAATAGAGTTGTATAATTAAAACATTATTAAAGAAACTGAATACCTTTCTGCAGATGCTATTGTGAGTCCATTTGAATCACACCTCAGAGTCTGAAAAACTTCCTCAAGTGGCACGATTTCCTGCAAAGAGATTAAAAGGAAAAAAGAAAAAAAAAACAAAATAAAAAATAAAACCATAATCCACACAAAAACTGAGGAAATTTGGCAAAAAAACAAAACAGAACTTAAAACTTCCAACACCAGGAACATAAAAACAAAACCCAGAAACACTCATCAATCACATGCTTACTACTCCTATTTTTCAACTG…	ATGTCATGGAACTTCACGGATTGCCTAACGATGCGTGTCAAGTACCTCGAAGCGGTCAAGCGAAGGTTGCATGCCACCAAACAATGGTCCCCAAACGAAATTAAGTTGGCTGGCGTTGTTGCCGTTGAGGTCACGGGTGGACCTGAAGTTCCATTCCACCCTGAAAGAGAGAGCTACAACCAGAGCTGCCAAGGTTCTGAGGGTAATTTTAGGAGCCTCCATTCCCATTTGTTAAAGGGCCAAGATGGTTTTCCTTTTGCATTGAAGGAAATCGTGCCACTTGAGGAAGTTTTTCAGACTCTGAGGTGTGATTCAAATGGACTCACAATAGCATCTGCAGAAAGAAACACAAACTCAAACCCGCAAAACACCACCATAGCAAACCTTACAACACTTACT…	>GmaAPX18.1	MSWNFTDCLTMRVKYLEAVKRRLHATKQWSPNEIKLAGVVAVEVTGGPEVPFHPERESYNQSCQGSEGNFRSLHSHLLKGQDGFPFALKEIVPLEEVFQTLRCDSNGLTIASAERNTNSNPQNTTIANLTTLTV
glyma.Zh13.gnm1.ann1.SoyZH13_19G046600	glyma.Zh13.gnm1.ann1.SoyZH13_19G046600	SoyZH13_19G046600	ascorbate peroxidase 1; IPR010255 (Haem peroxidase); GO:0004601 (peroxidase activity), GO:0006979 (response to oxidative stress), GO:0020037 (heme binding), GO:0055114 (oxidation-reduction process)	8365409	8368217	19	+	ATGGATTTGTGGGTGAGTGAGAGATTAGATGGGATCAAAAGGAGAAAAAAAAAATACACGAGAAGGGTTTTGTTATACGATTTTTTCCTCTTCTACATTATTCTTCTTTCATTGTTTGGTTTTTTTTTTTTTACTACCATTTGATTTTTCCCCTTTGTCAGAAGGCCGTTGAGAAGGCAAAGAAGCTCAGAGGCTTCATCGCTGAGAAGAGGTGCACTCCTCTAATGCTCTGTTTGGCGTGCGCTTTTTTTATTTTTTTTATTTAACATTAGATCACTGTTATTTACGATTGAGTTTATGGATTATCGTTTTGACGCATTTTGGTGTGTTTCGTGTGCAGATGGCACTCTGCTGGAACCTTTGACAAGGGCACAAACACTGGTGGACCCTTCGGACATC…	ATGGATTTGTGGTTGGCTGGCGTTGTTGCCGTTGAGGTCACGGGTGGACCTGAAGTTCCATTCCACCCTGGAAGAGAGGAAATCGTGCCACTTGAGGAAGTTTTTCAGACTCTGAGGTGTGATTCAAATGGACTCACAATAGCATCTGCAGAAAGTTGTGGCTTTATTGATGGATTCTATTTTATTATGTTTTTTCTCCTGTTTGATCAAGTGTGA	>GmaAPX19.1	MDLWLAGVVAVEVTGGPEVPFHPGREEIVPLEEVFQTLRCDSNGLTIASAESCGFIDGFYFIMFFLLFDQV
glyma.Zh13.gnm1.ann1.SoyZH13_19G090600	glyma.Zh13.gnm1.ann1.SoyZH13_19G090600	SoyZH13_19G090600	ascorbate peroxidase 2; IPR010255 (Haem peroxidase); GO:0004601 (peroxidase activity), GO:0006979 (response to oxidative stress), GO:0020037 (heme binding), GO:0055114 (oxidation-reduction process)	36783119	36788674	19	+	ATGTTTTCGTCGAATAAATGTTGGTGGCGACTCCGCGCATTTTCCTTTCTTGGAAGATGCACTCATGAGCCCTCGCGTCGTCCTCCCGCCGAAGGTTAGGTTGCGGCAACACTCTCTGCATAAAACATAATAATATATAACCTAACAAATTGAGCATTAAATATAATTCATCTTATTATATTCTCAATGAAAAAAATAGTTGTTGCCTCTTATATTAAAGTAAACAATATATACTACCTATAAAATTAAGTAAAATATAATTCATGAGTTTTTTACCAAAAAAAATAAATATTTACCTAAATAATACAATTACAAAATTTATACCAATGATACATTTTACTTTAGCCCAAAACGATTTATGACTGCTTTATATATATATATATATATATATATATATAT…	ATGTTTTCGTCGAATAAATGTTGGTGGCGACTCCGCGCATTTTCCTTTCTTGGAAGATGCACTCATGAGCCCTCGCGTCGTCCTCCCGCCGAAGGTTTGAACAAGTTTTGGGCTTTTGGTGGTAATGTGGTGGCTATGGATAATGACTCGTGTGGAGTGGGGTTCATGGCGGAACTGTCCAACGAAAGTAGCTGCAAAACGGTGATTGATGTTTTGGAGATGCTGGTGCGCATGGACCCTTCGGACATTGGTATTAGGCTTTTGGAGCCACTCAAGGCGGAGTTCCCTATTTTGAGCTATGCCGATTTCTACCCGTTGGCTGGCGTTGTTGCCGTTGAGGTCACGGGCGGACCTGAAGTTCCATTCCACCCTGGAAGAGAGGTGGAAATGGAACTTACC…	>GmaAPX19.2	MFSSNKCWWRLRAFSFLGRCTHEPSRRPPAEGLNKFWAFGGNVVAMDNDSCGVGFMAELSNESSCKTVIDVLEMLVRMDPSDIGIRLLEPLKAEFPILSYADFYPLAGVVAVEVTGGPEVPFHPGREVEMELTK

## Sheet: G. soja
			geneid	transcript id	protein id	functional description		chromosome id	start	end	Genome	CDs	Protein
D0Y65_001738	D0Y65_001738	RZC30300	Glysoja.01G001740	Glysoja.01G001740.1	Glysoja.01G001740.1	putative L-ascorbate peroxidase 3, peroxisomal, partial [Glycine soja]	>GsoAPX1.1	1	50732560	50737630	TTGGTTTTGTATCTGTGTCTGTTGCTGTGCTCAAAAAATGGGGTGGTGGTGGAGGTTCTGCAAAAGTTGCCTATTTTAATGCCTCGAACTCTGGCTTTGGCTGGCAAGTACCAAAGGTACTTTATTTTTGGGTCAAAACCTTCACTTGAATCTCTCTAAACTAAAGTAGAGAGATAATGCAGTTTAGGAATGGGGTTTGGTTGATGATAGTTATGTTAGTGTTATGTGATACTGCATTGGGTTTTTAGTTTTCTCTCTCTCTCTCTTTAGTGGAGTAGCAGCAATGGAGAAAGAGGAGTAGCACACAGACAAGAGGCTTTGGGCAGAGAGCCTGCAATTAAAAAAGAGAGCAAGTTTTATTTTATGTTTGGATTCAAGTGGACGAGAATACCCCTCTCC…	TTGGTTTTGTATCTGTGTCTGTTGCTGTGCTCAAAAAATGGGGTGGTGGTGGAGGTTCTGCAAAAGTTGCCTATTTTAATGCCTCGAACTCTGGCTTTGGCTGGCAAGTACCAAAGTTTAATCCTCACTGCTTTAGTTTTGGTTTCTTTGGAGAGAATAGAGGAAGTGAAGGCCAAATATCCAAAAGTTTCATATGCCGACCTTTACCAGCTAGCTGGTGTTGTTCCAGTAGAGGTCACTGGGGGTCCAACTATGGACTTTGTTCCAGGGAGAAAAGATTCATTGGAATCTCCAGTAGAAGGGTGTCTTCCGGATGCCGAACAAGATGACAAGGAAAAGGAAAGAAGTGTAGGGCATCTTTGGTGTTGGCAAGGAAAAAGAAAACAACAAAGGAGGAGG…	LVLYLCLLLCSKNGVVVEVLQKLPILMPRTLALAGKYQSLILTALVLVSLERIEEVKAKYPKVSYADLYQLAGVVPVEVTGGPTMDFVPGRKDSLESPVEGCLPDAEQDDKEKERSVGHLWCWQGKRKQQRRREKGNGKEKGNNRREKTELLRGESKDLLKLPTDKALVEDPNFRKYVELYAKDEDAFFADYATSYKKLRARLHFQESSFHIGQGSYRNCYCLNRCDLGLLT*
D0Y65_001740	D0Y65_001740	RZC30302	Glysoja.01G001741	Glysoja.01G001741.1	Glysoja.01G001741.1	L-ascorbate peroxidase 3 [Glycine soja]	>GsoAPX1.1	1	50740356	50744403	CTTGCTGCCTCTCCCACGACACAATCCCAAATTAAACAAACTTTGACAATGGCGGAACCTGTTGTTGACGACGAATATCTCAAGGAAATAGACAAGGCTCGACGTGAACTTCGCGCTTTCATCACCAGCAACCAATGCGCTCCTCTCATGCTTCGATTAGCGTACATCACTCACTACTGCTTTCATTTCTTAACTTCTAAAGTAACATGTCAATAAGTCCTTTTAAAAGATTCCTTTCTTTTTTTCATCCATGACAATTTATAATAATTTACATATCTGATTTAACTATTTAAATTCCTTTAATGTAACATATAGATTTTAAGAAAAAAAAAACAACTTAAAGAATGTAATAACTTATTTTTAAAAGACTTTTATAATCAATGTTTTGTAATTTAAATT…	ATGGCGGAACCTGTTGTTGACGACGAATATCTCAAGGAAATAGACAAGGCTCGACGTGAACTTCGCGCTTTCATCACCAGCAACCAATGCGCTCCTCTCATGCTTCGATTAGCGTGGAACGATGCTGCCACCTACGATGCCAGAAACAGAGCAGGAGGCCCCAACGGTTCTATCAGGACTGATAAAGAGTTGAAACACGAAGCAAACGAGGGATTGTTAAAAGCAACTCAATTATGTGAGCATGTGAAGGCCAAACTTAAAAAAGTTTCATACGCAGACCTTTACCAGCTAGCTGGTGTTGTTGCAATAGAGGTCTCTGGGGGTCCAACTATTGAATTTTTGCCTGGGAGAAAAGATTCAATGGAATCTTCAGCAGAAGGGCTTCTTCCAGATGTCAAA…	MAEPVVDDEYLKEIDKARRELRAFITSNQCAPLMLRLAWNDAATYDARNRAGGPNGSIRTDKELKHEANEGLLKATQLCEHVKAKLKKVSYADLYQLAGVVAIEVSGGPTIEFLPGRKDSMESSAEGLLPDVKQGASIIRNIFSRMGISDDKHIVALCGGLTWGETLKDRSDSKGQWPKDPLKFDNSYYKKILSKDLSSRLPIEDALLTDQSFRRHVEEYSKDENSFFKEYAMSHKKLSELGYNLKKQNQSKVPDEEQNQPKGPYEKLNQHRGLIGIGIVSVVTVILGYLLKRKKNQLKK*
D0Y65_004267	D0Y65_004267	RZC25498	Glysoja.02G004270	Glysoja.02G004270.1	Glysoja.02G004270.1	L-ascorbate peroxidase, cytosolic, partial [Glycine soja]	>GsoAPX2.1	2	31048987	31049348	AAGGCCGTTGAGAAGGCAAAGAAGCTCAGAGGCTTCATCGCTGAGAAGAGATGCGCTCCTCTAATGCTCTGTTTGGCGTGCGTTCTTTTTTAATTTTTTTATTTAACTTTAGATCGCTGTTATTTACGATTGAGTTTATGGATTATTGTTTTGACGCGTTTTGGTGTGTTTCGTGTGCAGATGGCACTCTGCTGGAACTTTTGACAAGGGCACAAACACTGGTGGACCCTTCGAACATTGCTATTAGGCTTTTGGAGCCACTCAAGACGGAGTTCCCTATTTTGAGCTACGCCGATTTCTACCTGGTGACGTATTTTTTGTCTTTGGTGTTTTTGCGCTTAATGCTGTGTTTAGGCGCTTAA	AAGGCCGTTGAGAAGGCAAAGAAGCTCAGAGGCTTCATCGCTGAGAAGAGATGCGCTCCTCTAATGCTCTATGGCACTCTGCTGGAACTTTTGACAAGGGCACAAACACTGGTGGACCCTTCGAACATTGCTATTAGGCTTTTGGAGCCACTCAAGACGGAGTTCCCTATTTTGAGCTACGCCGATTTCTACCTGGTGACGTATTTTTTGTCTTTGGTGTTTTTGCGCTTAATGCTGTGTTTAGGCGCTTAA	KAVEKAKKLRGFIAEKRCAPLMLYGTLLELLTRAQTLVDPSNIAIRLLEPLKTEFPILSYADFYLVTYFLSLVFLRLMLCLGA*
D0Y65_008975	D0Y65_008975	RZC15368	Glysoja.04G008978	Glysoja.04G008978.1	Glysoja.04G008978.1	putative L-ascorbate peroxidase 6 [Glycine soja]	>GsoAPX4.1	4	5541664	5543801	AGAAGCTGTCTGATTGTCCATAACTTAACATGAGAATCTTAACATTACAGAAGCAAGAAATATTGTGATAAAGTCCCGATTCTAAACCAGACTAACAAGGCAAGAAATATTGTGATTTACTGACCAAAAAATCACTGGTAATAAGCTTATTAGTTATTGTTTAAAATTTTCAACGTATTTTACTTGAATTAGTTTTGCTTATGCATCCTTATCATTTGGAGCTTTTCTTTTATAGAACACAAGAACTTGTGGCTTTGTCTGGAGCCCACACTATTGGAAGTAAAGGTTTTGGAAGCTCAATTTCTTTTGAAAATTCATATTATAAGGTTCTTTTGGAGAAGCCCTGGACGTCTTCAGGTAAGTTAACAGCTTATTTCATCTAAACATCGTTTTTATATT…	ATGTCGAGTATGATTGGCCTTCCTTCAGATCACGCTCTTGTTGAGGATGATGAATGCTTAAGATGGATTAAAAAATACGCAGACAGTGAGAATCTGTTCTTTGAAGATTTCAAAAATGCGTATGTCAAGCTGGTGAATTCTGGTGTGGGTGGAATAGCTTATAAATTCAGGAGTTGA	MSSMIGLPSDHALVEDDECLRWIKKYADSENLFFEDFKNAYVKLVNSGVGGIAYKFRS*
D0Y65_009371	D0Y65_009371	RZC16048	Glysoja.04G009374	Glysoja.04G009374.1	Glysoja.04G009374.1	L-ascorbate peroxidase, cytosolic, partial [Glycine soja]	>GsoAPX4.2	4	11286638	11287300	GGCACTCTGCTGGAACCTTTGACAAGGGCACAAAGACTAGTGGACCCTTCGGACATTGCTATTAGGCTTTTGGAGCCACTCAAGGCGGAGTTCCCTATTTTGAGCTACGCCGATTTCTACCCGGTGATGAGTTTTTTGTCTTTGGTGTTTGTGCGCTTAATGTTGTGTTTGTGTTGACACAGTTGGCTGGCGTTGTTGTCGTTGAGGTCACGGATGGACCTGAAGTTCCATTCCACCCTGGAAGAGAGGTATAATATCGCAAGTTTTTAGTTTTTATTTGATTTGATTATGCTTATTGTATATAATAATAATAATAATAATAATAATAATAATAATAATAATAATATTGGAATTGTACTACTTTATCCATGTATCACAAGATTCAAAGTGATCTACAAT…	GGCACTCTGCTGGAACCTTTGACAAGGGCACAAAGACTAGTGGACCCTTCGGACATTGCTATTAGGCTTTTGGAGCCACTCAAGGCGGAGTTCCCTATTTTGAGCTACGCCGATTTCTACCCGTTGGCTGGCGTTGTTGTCGTTGAGGTCACGGATGGACCTGAAGTTCCATTCCACCCTGGAAGAGAGCCAACCCAAATAGGAAACCAACTCAACATAACAACAATGGGAGAAGTTACATGTTTCCTTTTTCAAATACTAGCACTTCGGAGGCTTAACAACAACTATGCTCTCAACTTTGCAGTTGATAGATACACATGCAACATTTGTTAA	GTLLEPLTRAQRLVDPSDIAIRLLEPLKAEFPILSYADFYPLAGVVVVEVTDGPEVPFHPGREPTQIGNQLNITTMGEVTCFLFQILALRRLNNNYALNFAVDRYTCNIC*
D0Y65_009728	D0Y65_009728	RZC16567	Glysoja.04G009731	Glysoja.04G009731.1	Glysoja.04G009731.1	L-ascorbate peroxidase, cytosolic, partial [Glycine soja]	>GsoAPX4.3	4	25837038	25846333	AAGCGCCTTGGCTTGGATTTTCTTCACGGAAACAATTTTCCTCAGTAATTTCAAGTGAATACAAAGTGCCAAGAAGGTTGAACCCCTTCCTTCTTCACTCCTCCCTCTATTTATAGCAAAATAGGGGAGGAGCTTGCCACCCAGCTCGCCCAAGCGAGCCAGGTTGCTTCCTTCAAAAGCAACCACCTTCTGGAGGAAGAATCTTGAATGCCCAAGTGGGCCTGGTTGCTATTTGCACCCTTTTTTTTACTAAATACACCCCCCTTTGCTTTTTTTATTTGTGATTCTTTTTCCGCAACGTTACGAAACTTTATGAATTTTGCAACAATACTTGTTTTCTTTCCATAAGGTTACGGAACCTTACGGATCATGTAATTACTCCTTTTTTAGCTTTTGAAA…	ATGTACCCAAAAAATCATCATTTTCACATCTCACTCAACCCTCTTCTCTCCCCTCTCATCAAACCCATCTGCATCCACTCTCCCCCTGTCGCATTCACATCGACGTCGCTTGTTCCACCAAAATCTGCCAAGTATGAAACTCTCCCCAACGAAAGCACCACCGAGGAGCAACTTCACACCACCGATGCCGACGCGCTTCAATTGCTCCTACAAACCAAGATCAGAGCCCTCGAAATCAACGAAGCAATTCACATTTTAGACCGTCTAATCGAGCTCGAGCCCAAGGAGTCCAAGTACTCACTCCTAAAGGCGCACCTGCACATGCACTACGGTGAGCACAAACTCACCACGAACGTGTTCGAGGAATTGATTCATAGAGACTCGTTCCACGTGGAGGCC…	MYPKNHHFHISLNPLLSPLIKPICIHSPPVAFTSTSLVPPKSAKYETLPNESTTEEQLHTTDADALQLLLQTKIRALEINEAIHILDRLIELEPKESKYSLLKAHLHMHYGEHKLTTNVFEELIHRDSFHVEAYRSLLMLTSGTNKPMEELLKRIKEKAVEKTKKLRGFIAEKRCAPLMLYGTLLEPLTRAQTLVDPSDIAIRLLESLKAEFPILSYADFYPLAGIVAMEVTGGPEVPFHPGREVLCSKTLLLYCFLLLQEIVPLKEVFQTLRCDSNGLTSHNSICRKALFYVVMSGVNIEIFSFEVPDCVSDEVHWMLSYPNFVWGLLFDGMQPLVDRFEKVVAFEGSNLARLGELGGKLLPYFAINRGRSEEGRGSTFLALCIHLKLLRKIVSVKKI…
D0Y65_010743	D0Y65_010743A	RZC18236	Glysoja.04G010747	Glysoja.04G010747.1	Glysoja.04G010747.1	L-ascorbate peroxidase T, chloroplastic isoform A [Glycine soja]	>GsoAPX4.1	4	51176378	51182983	AGAACTAACATTGTATGCGGAGAAATTTATTCAATGAAACAATCATATAACTTCATTATCTACTTAAACTCCCACCTCCACCTCCAGATTTAGTTGTAGTCCACATTTAAGTAGAAGCACATATGGTCAGCAGAGATATTTGCCCTGAGTGCCTTACTTTTTGCCTACCATCTTTCCGTCAATTGCTAGTGACCTCGACCAGAAGTTTTCTTCATTAATTTTTTGGTTAATTTAGATTACATTTTACCAACCCGTTGGGGACAGATTTTGTAATAGCTCGCCAAATTCCACAACAAGTAAAGATTACATTATTTATTAATTCAATAATACGCTATTTTCAAGTGATTATTTTGGCTCAATCAATAAATTACTTGCTGCCATATGTAAAAGTTAGAACAA…	ATGGCAGAGCGTGTGTCATTGCCTTTACCATCTCAGTCTCAACTCTCTCCAACAACCACAATGGCTCTCTTGGGCGCCGCCTCCTCCTCCGCTCGCATCATTCCCTCCGTCTCACTCTCTTCCTCTTCTCGCTCCTTCTTCTCACTCTCATCCTCTTCTTCCAAACTCCAATGCTTGCGCTCCTCTCCTCGTATTTCGCACCTCTTTCTCAATCAGCGAAGAGCGGAGGTTCGCGTTTCGAGTGGAGGATACGGAACTGTGTCGGCACCGAAGTCAGTTGCGTCTGATCCTGATCAGTTGAAGAGCGCCAGAGAAGATATCAAGGAGCTTCTCAACTCCAAGTTCTGCCATCCTATTCTCATTCGTTTGGGATGGCATGATGCTGGTACTTATAATAAG…	MAERVSLPLPSQSQLSPTTTMALLGAASSSARIIPSVSLSSSSRSFFSLSSSSSKLQCLRSSPRISHLFLNQRRAEVRVSSGGYGTVSAPKSVASDPDQLKSAREDIKELLNSKFCHPILIRLGWHDAGTYNKNIEEWPQRGGANGSLRFEIELKHGANAGLVNALKLLQPIKDKYSGVTYADLFQLAGATAVEEAGGPKIPMKYGRVDVSGPEQCPEEGRLPDAGPPSPADHLRQVFYHMGLNDKEIVALSGAHTLGRSRPDRSGWGKPETKYTKDGPGAPGGQSWTVQWLKFDNSYFKDIKEKKDEDLLVLPTDAALFEDPSFKVYAEKYAEDQEAFFKDYAEAHAKLSNLGAKFDPPEGIVIDDSPNAGAEKFVAAKYSTGKRELSDGMKQKIRAE…
D0Y65_011598	D0Y65_011598	RZC11479	Glysoja.05G011602	Glysoja.05G011602.1	Glysoja.05G011602.1	L-ascorbate peroxidase, cytosolic, partial [Glycine soja]	>GsoAPX5.1	5	10125226	10126835	TCTGCAGATGCTATTGTGAGTCCATTTGAATCACACATCAGAGTCTGAAAAACTTCCTCAAGTGGCACGATTTCCTGCAAAGAGATTAAAAGGAAAAAAACAAAATAAAAAATAAAACCATAATCAACACAAAAACTGAGGAAATTTGGCAAAAAAACAAAACAGAACTTAAAACTTCCAACACCAGGAACATAAAAACAAAACCCAGAAACACTCATCAATCCCATGCTTGCTACTCCTATTTTTCAACTGCAAGAAAAAAAGGTAGACATGAATGATATGGTGGCAAGAAACAAATCACAGACCAGTGAAGCAGAACGTAGTAATGTCTTGAAACATAATACCTGCCGCAACAAAAAATAAAGTAAAAATATTAACTACCAAGCTGCAGTGAAAATG…	GGCACTCTGCTGGAACCTTTGACAAGGGCACAAACACTGGTGGACCCTTCGGACATTGCTATTAGGCTTTTGGAGCCACTCAAGGCGGAGTTCCCTATTTTGAGCTACGCCGATTTCTACCTGTTGGCTAGCGTTGTTGCCGTTGAGGTCACGGGTGGACCTGAAGTTCCATTCCACCCTGGAAGAGAGGTATTATGTTCCAAGACATTACTACTCTATTGCTTTCTGTTGTTGCAGGTATTATGTTTCAAGACATTACTACGTTCTGCTTCACTGGAAATCGTGCCACTTGAGGAAGTTTTTCAGACTCTGATGTGTGATTCAAATGGACTCACAATAGCATCTGCAGAA	GTLLEPLTRAQTLVDPSDIAIRLLEPLKAEFPILSYADFYLLASVVAVEVTGGPEVPFHPGREVLCSKTLLLYCFLLLQVLCFKTLLRSASLEIVPLEEVFQTLMCDSNGLTIASAE
D0Y65_013953	D0Y65_013953A	RZC06148	Glysoja.06G013959	Glysoja.06G013959.1	Glysoja.06G013959.1	putative L-ascorbate peroxidase 6 isoform A [Glycine soja]	>GsoAPX6.1	6	5275075	5280621	AAAGAAAGAAAGAAGGTGTGTGGCGTCAGGTAGAGATAATGAGATTAGGTGTGAGTGTGAGTGTGAGTGTGCGGTGCTCAATCGGCACCGCTTCAGGCAACACCCAAACCGATTATCCCGCCAAATTCCAACGGTCATCTTTCTCAACTGCCAACTTCCTCCCCGACAACGCTTCTTCAGGTAAGGGAGGCAACCTTCAACCTCGGATGGAGCTGCTGTTATTGTGCTTATACTTTAACTACACGGTAACCGTTTTTCGTAGATTTAGCAGTTTCAATTTCGAGTAGTAGCAGCAGGAGAGGGCTAATACGCATAGCCACGTTGCCATGTCTTCTTCCCCTCATAGGTTGCCTCCCAGCCAACGCCATGCAGTAAGTATGTATATAATTAAAATTTAAT…	ATGAGATTAGGTGTGAGTGTGAGTGTGAGTGTGCGGTGCTCAATCGGCACCGCTTCAGGCAACACCCAAACCGATTATCCCGCCAAATTCCAACGGTCATCTTTCTCAACTGCCAACTTCCTCCCCGACAACGCTTCTTCAGATTTAGCAGTTTCAATTTCGAGTAGTAGCAGCAGGAGAGGGCTAATACGCATAGCCACGTTGCCATGTCTTCTTCCCCTCATAGGTTGCCTCCCAGCCAACGCCATGCAGCCAGGTTCAAAGGAATATCTTCTCATTAAAGAAGAGGTGAGGAAGGTCTTGTCCAAGGGAAAGGCTGCTGGCGTGCTTCGATTGGTATTCCATGATGCCGGAACCTTTGACATCGATGACAGTACAGGTGGTATGAATGGTTCTATA…	MRLGVSVSVSVRCSIGTASGNTQTDYPAKFQRSSFSTANFLPDNASSDLAVSISSSSSRRGLIRIATLPCLLPLIGCLPANAMQPGSKEYLLIKEEVRKVLSKGKAAGVLRLVFHDAGTFDIDDSTGGMNGSIVYELERPENAGLKKSVKVLQKAKTQIDAIQPVSWADMIAVAGAEAVEVCGGPPIQVSLGRLDTLVPDPEGRLPEESLNASGLKKCFQSKGFSTQELVALSGAHTIGSKGFGSPISFDNSYYKVLLEKPWTSSGGMPSMIGLPSDHALVEDDECLRWIKKYADSENLFFEDFKNAYVKLVNSGVRRNSL*
D0Y65_014406	D0Y65_014406	RZC06966	Glysoja.06G014412	Glysoja.06G014412.1	Glysoja.06G014412.1	L-ascorbate peroxidase T, chloroplastic [Glycine soja]	>GsoAPX6.2	6	9350953	9358789	CTCAGCTAGTTGGTAGGTGTATACCTAAAACGATTCGTCTCTTCCCAAACACAAATCGTGATTCGAAGCTAACTGGAAGGGTGGCCATCTGGCACATCATCCGAAACAAAAGGAGTGGAGAACGAAATAACCAAAAAAATACAAATATATAAATAATTAAAGCAGCCTCGACCCACAAAATGGCAGAGCGTGTGTTACTCCTCACTCCATCTCAGTCTCATCACTCTCCAACCACAATGGCTGTCTTGGGCGGCGCCGCCTCCGCTCGCATCATTCCCTCCGTCTCACTCTCCACCTCTTCTCGCTCCTTCTTCTCCTTATCATCCTCTTCCAAACTCAAATGCTTGCGCTCCTCTCCTCGCATTTCGCACCTCTTTCTCAATCAGGTTTTGCCTCGTT…	ATGGCAGAGCGTGTGTTACTCCTCACTCCATCTCAGTCTCATCACTCTCCAACCACAATGGCTGTCTTGGGCGGCGCCGCCTCCGCTCGCATCATTCCCTCCGTCTCACTCTCCACCTCTTCTCGCTCCTTCTTCTCCTTATCATCCTCTTCCAAACTCAAATGCTTGCGCTCCTCTCCTCGCATTTCGCACCTCTTTCTCAATCAGCAAAGAGCGGAGGTTCGCGTTTCGAGTGGAGGATACGGAACGGTATCGGCGCCGAAGTCCGTTGCGTCTGATCCTGATCAGTTGAAGAGCGCTAGAGAAGACATCAAGGAGCTTCTCAACTCCAAGTTCTGCCATCCTATTCTCATTCGTTTGGGATGGCATGATGCTGGTACATATAATAAGAATATTGAG…	MAERVLLLTPSQSHHSPTTMAVLGGAASARIIPSVSLSTSSRSFFSLSSSSKLKCLRSSPRISHLFLNQQRAEVRVSSGGYGTVSAPKSVASDPDQLKSAREDIKELLNSKFCHPILIRLGWHDAGTYNKNIEEWPLRGGANGSLRFEVELKHGANAGLLNALKLLQPIKDKYSGVTYADLFQLASATAVEEAGGPKIPMKYGRVDVSGPEQCPEEGRLPDAGPPSPADHLRQVFYRMGLNDKEIVALSGAHTLGRSRPDRSGWGKPETKYTKDGPGAPGGQSWTVQWLKFDNSYFKDIKEKRDEDLLVLPTDAALFEDPSFKVYAEKYAEDQEAFFKDYAEAHAKLSNLGAKFDPLEGIVIDDSPNAGGEKFVAAKYSIGKSELSDSMKQKIRAEYEA…
D0Y65_026431	D0Y65_026431	RZB86371	Glysoja.10G026442	Glysoja.10G026442.1	Glysoja.10G026442.1	L-ascorbate peroxidase, cytosolic, partial [Glycine soja]	>GsoAPX10.1	10	11710605	11711034	AAGGACGTTGAGAAGGCGAAGAAGCTCAGAGGCTTCATCGCTGAGAAGAGATGCGCTCCTTTAATGCTCTGTTTGGTGTGCGTTCTTTTTTTTATTTATTTATTTAACATTAGATCACTGTTATTTACAATTGAGTTTATGGATTATCGTTTTGACGCGTTTTGGTGTGTTTCGTGTGCATATGGCACTCTGCTGGAACCTTTGACAAGGGCACAAACACCGGTGGACCCTTCCGACATCGCTATTAGGCTTTTGGAGCCACTCAAGGCGGAGTTCCCTATTTTGAGCTACGTCGATTTCTACCCAGTGATGTTTTTTTGTCTTTGGTGTTTGTGCGCTTAATGTTGTGTTTGTGTTGACGCAGTTGGCTGGCGTTGTTGCCGTTGAGGTCATGGGTGG…	AAGGACGTTGAGAAGGCGAAGAAGCTCAGAGGCTTCATCGCTGAGAAGAGATGCGCTCCTTTAATGCTCTATGGCACTCTGCTGGAACCTTTGACAAGGGCACAAACACCGGTGGACCCTTCCGACATCGCTATTAGGCTTTTGGAGCCACTCAAGGCGGAGTTCCCTATTTTGAGCTACGTCGATTTCTACCCATTGGCTGGCGTTGTTGCCGTTGAGGTCATGGGTGGACCTGAAGTTCCATTCCACCCTGGAAGAGAG	KDVEKAKKLRGFIAEKRCAPLMLYGTLLEPLTRAQTPVDPSDIAIRLLEPLKAEFPILSYVDFYPLAGVVAVEVMGGPEVPFHPGRE
D0Y65_029291	D0Y65_029291	RZB78848	Glysoja.11G029301	Glysoja.11G029301.1	Glysoja.11G029301.1	L-ascorbate peroxidase 3 [Glycine soja]	>GsoAPX11.1	11	5950676	5953331	TTAAAGATATAAAATGAAGATTATATTTAAGGAACATTTGGAAACTTTTGAAGTGCACCAATTATATACAAGCTTTTTTATTTGTGGGAAAGAAGAAAATCAAACAAGTGTCCTGTTGTGGGGACTAGAACATTTATGTTAATAATAGTCTCTTCAATTGGTTTTTTTGTTCAGTTCACGTAAGTAACCCAAGATCACCGCGGTTAAGACAATAGCAATTCCTATAACTCCCTTGGCCAATATGGAACGATGATTCTTGAAAATAAAGCCCAGCTCTGAGAGTTTTTTGTGTGAGGTTGCATAATCTGAGAAAAAAGCATCTTCATCCTACATAGTACAATTGAAAATTATTAGTGTGAACCAAAATTCTTTTTATTATTATATTGATAAAAAAAATAG…	ATGGCAAAGCCTAGAGTTGATGCTGAGTATCTGAAGGAAATCGAGAAGGCTCGTCGTGACCTTCGCGCTCTTATCTCCAACAGAAACTGCGCCCCTCTCATGCTTCGATTAGCGTGGCATGATGCTGGTACTTACGATGCTAAAACAAACACAGGAGGCCCTAATGGTTCTATCAGAAACAGACAAGAGTTGAATCACGCAGCAAACAAGGGACTGGAAACAGCACTTGCCTTCTGTGAGGAAGTGAAGGCCAAACATCCAAAAATTTCATATGCCGACCTTTACCAGCTAGCTGGTGTTGTTGCAGTAGAAGTTACCGGGGGGCCAACTATTAACTTTGTTCCCGGGAGAAAAGATTCATTGGAATCTCCAGCAGAGGGGCGTCTTCCAGATGCCAAA…	MAKPRVDAEYLKEIEKARRDLRALISNRNCAPLMLRLAWHDAGTYDAKTNTGGPNGSIRNRQELNHAANKGLETALAFCEEVKAKHPKISYADLYQLAGVVAVEVTGGPTINFVPGRKDSLESPAEGRLPDAKQGASHLRDIFYRMGLGDKDIVALSGGHTLGKAHKDRSDFHGQWTKDPLKFDNSYFVELLRGESKDLLKLPTDKALVEDPNFRKYVELYAKDEDAFFSDYATSHKKLSELGFIFKNHRSILAKGVIGIAIVLTAVILGYLRELNKKTN*
D0Y65_029317	D0Y65_029317	RZB78887	Glysoja.11G029327	Glysoja.11G029327.1	Glysoja.11G029327.1	L-ascorbate peroxidase 3 [Glycine soja]	>GsoAPX11.2	11	6122599	6125845	ATGGTGGAACCTATTGTAGTTGACGAGGAGTATCGCAAGGAAATAGAAATGGCTCGACGAGAACTTGGCGTTTTCATCACCAACAATAAATGCGCCCCTCTCATGCTTCAATTTGCGTACCTCACACTACTTAATTACTGCTTTCATGTCTTTCTAGCTAATTCTCTCCATTGTCTCCGGTGATTCGCATAATTTTAGCGTGTTTGAATGAAATTTCATAGAATTGATTTTTGATTTAAGTGTATGTTTAATTGGACGTTAGGTTATTTAAAATTGTATTGTTTACCTAAATAAACTTTTACATGTTTGATTCTACACAATTTTATTTAAAATCAATTTTACTTACACTTATATTCAAACACACTAATATTGATTTTAAAGTGAAATGGTTTATGGTTG…	ATGGTGGAACCTATTGTAGTTGACGAGGAGTATCGCAAGGAAATAGAAATGGCTCGACGAGAACTTGGCGTTTTCATCACCAACAATAAATGCGCCCCTCTCATGCTTCAATTTGCGTACCTCACACTACTTAATTACTGCTTTCATGTCTTTCTAGCTAATTCTCTCCATTGTCTCCGGTGGAATGATGCTGCAACCTACGATGCCAAGAGCAGAAGAGGAGGCCCCAACGGTTCTATCAGATTAAGGATTGGACAAGAGTTGAAACACGAAGCAAACAAGGGATTGGAAAATGCAGTTCAATACTGTGCTTGTGGTGCTGTTGCAGTAGAGGTCACTAAGGGTCCAACTATTGACTTTGTTCCCGGCAGAAAGGATTCAAATGAGTCTCCACGAACT…	MVEPIVVDEEYRKEIEMARRELGVFITNNKCAPLMLQFAYLTLLNYCFHVFLANSLHCLRWNDAATYDAKSRRGGPNGSIRLRIGQELKHEANKGLENAVQYCACGAVAVEVTKGPTIDFVPGRKDSNESPRTEGRFIDGEEDARNLRKIFSRMGLSDEQDIVALCGGHTLIRTMYPKVPMDEEIFFKEYAISHGKLSELGFNLNNLDQPKGPYAKLNQHKGLIGIGIASVVVTVILGYLLKRKKNQLKN*
D0Y65_029573	D0Y65_029573	RZB79334	Glysoja.11G029583	Glysoja.11G029583.1	Glysoja.11G029583.1	L-ascorbate peroxidase 3 [Glycine soja]	>GsoAPX11.3	11	8214021	8218754	GGGGTTGTTCCACCTGGTTAAACACTTAAAAGAGAATTCTCTATGCTAGTGCATTCTAATTATAAGCATGATTTTCACAATTCTCTCGGCTAGTGCAGTTACGGACTCACGGTTTTCATAATTCTGATTTCCTCGCACGTAACATACACGACAAATTAGTCATTCTCTTTCGGCATGTCTACCCTCTAACCATTCAGAGAACAACACGTAACTGGGAATGTTAAAATTTGTATTTACGTATAATGAAGTTGCTCTCAATTTGAGTACTCAGGGATGTTTTTAGTCTATTCATATAAAAGTCTGAATGTCTGTAGCATTATTCTTTATTGGTACTAAGTAAACAGAAACTGAAGCTGCAAAAATGAACCCTGTTTTGCACACTATGGGTCAGGGTCAGGG…	ATGGCGTTGCCGGTAGTCGTCGATGCAGAGTACCTCAAGGAGGTCGACAAGGCTCGCCGCGATCTCCGCGCACTCATCGCTAACAGGAACTGCGCTCCTCTCATGCTCCGATTAGCCTGGCACGATGCCGGAACTTACGATGCTAAGACCAAGACCGGTGGACCTAACGGTTCGATCCGGAACGAGGAAGAGTATTCTCACGGAGCCAATAATGGCTTGAAGAAAGCTATTGATTTCTGCCAGGAAGTGAAGGCAAAATATCCTAAAATTACATATGCAGATCTCTTCCAGCTTGCGGGTGTTGTTGCAGTTGAGGTTACTGGGGGTCCAACAATTGATTTCGTTCCTGGTAGAAGAGATTCAAAAGTATCTCCTAATGAAGGGCGGCTTCCTGATGCT…	MALPVVVDAEYLKEVDKARRDLRALIANRNCAPLMLRLAWHDAGTYDAKTKTGGPNGSIRNEEEYSHGANNGLKKAIDFCQEVKAKYPKITYADLFQLAGVVAVEVTGGPTIDFVPGRRDSKVSPNEGRLPDAKKGVPHLRDIFYRMGLTDRDIVALSGGHTLGRAHPERSGFDGPWTEDPLKFDNSYFVELLKEDSAGLLKLPTDKALLEDAEFRCYVELYAKDEDAFFRDYAESHKKLSELGFVPSSKPISIKEGTILAQGAVGVVVATAVVILSYLYEVRKRGK*
D0Y65_029960	D0Y65_029960A	RZB80000	Glysoja.11G029970	Glysoja.11G029970.1	Glysoja.11G029970.1	L-ascorbate peroxidase, cytosolic isoform A [Glycine soja]	>GsoAPX11.4	11	11420791	11423997	CGATAACAATGATCCCTCGCCTTTTACAATCCCATCCTCTTTCTCCTCACTGGTCAGTCATAAAGCCTTTCCTCACCTACCCCACCGTGCAATTTACACGTGCACACCCATCCCAACCGTCAATTTCCCAAATCGACAACAACCGCATGATCAAAAAAATCCAACGGCCCATGATCACCTACTAGAACTTTCTCCGCTTCTCCCTATTATATCTACCTTCCCCCCTCCCATTGCTGGCTTGTGCTCTGCTCGTGCCTCTAGGGTTATCATTTCTCCATTTCCATTTCCTCTCTCACTTTTCAAGGTTCGTTTCGTATCACTCTATTCGCCGATTCACTTCACGATCTGCATTTTGACACACTCGATGTTGACCGTTTTTTTCTTTTTTTGTTTAGAATC…	ATGGGAAAGTCTTACCCAACTGTGAGTGCTGATTACCAGAAGGCCGTTGAGAAGGCGAAGAAGAAGCTCAGAGGCATCATCGCTGAGAAGAGATGCGCTCCTCTAATGCTCCGTTTGGCATGGCACTCTGCTGGAACCTTTGACAAGGGCACGAAGACCGGTGGACCCTTCGGAACCATCAAGCACCCTGCCGAACTGGCTCACAGCGCTAACAACGGTCTTGACATCGCTGTTAGGCTTTTGGAGCCACTCAAGGCGGAGTTCCCTATTTTGAGCTACGCCGATTTCTACCAGTTGGCTGGCGTTGTTGCCGTTGAGGTCACGGGTGGACCTGAAGTTCCATTCCACCCTGGAAGAGAGGACAAGCCTGAGCCACCACCAGAGGGTCGCTTGCCCGAT…	MGKSYPTVSADYQKAVEKAKKKLRGIIAEKRCAPLMLRLAWHSAGTFDKGTKTGGPFGTIKHPAELAHSANNGLDIAVRLLEPLKAEFPILSYADFYQLAGVVAVEVTGGPEVPFHPGREDKPEPPPEGRLPDATKGSDHLRDVFGKAMGLTDQDIVALSGGHTIGAAHKERSGFEGPWTSNPLIFDNSYFTELLSGEKEGLLQLPSDKALLSDPVFRPLVDKYAADEDAFFADYAEAHQKLSELGFADA*
D0Y65_033235	D0Y65_033235	RZB74047	Glysoja.12G033246	Glysoja.12G033246.1	Glysoja.12G033246.1	L-ascorbate peroxidase 3 [Glycine soja]	>GsoAPX12.1	12	2440656	2446460	TATTATACAGTGTTAATATAATAACACAATGAGAAAAATTAGCAATTTATTATCAATGAAAAAGTATAAATCGTATATTAAAAACACTATCTACACCTGGTTAACACTTAACAGGAGAATTCTCTATGCTACTGCAGTCTAATTATAAGCATGATTTTCACAATTCTCTCGGCTAGTGCAGTCACGGTTTTCATAATTCTGATTTCCTCGCGCGTAACAAACACAACAAATTAGTCTCTTTGAGCATGTCTACCCTCTAACCTTTCAGAGAACAACACGTAACTGGGAATGCTAAAATTTGTATTAACATATTAGGAAGTTGCTACCAAATTGAGTATTTAGGGATAGTTTTAGTCTATTCATATAAAAAAAAAGTCTGAATGGCTGTGGCATTATTCT…	ATGGCCTTGCCAGTGGTCGTCGACGCAGAGTACCTCAAGGAGGTCGACAAGGCTCGCCGCGATCTCCGCGCACTCATCGCTAACAGGAACTGCGCTCCTCTCATGCTTCGATTGGCCTGGCACGATGCCGGAACTTACGATGCTAAGACCAAGACTGGTGGACCTAACGGTTCGATCCGTAACGAGGAAGAGTATTCTCACGGCGCCAACAATGGCTTGAAGAAGGCTATTGATTTCTGTGAGGAAGTGAAGGAAAAACATCCTAAAATTACATATGCAGATCTCTACCAGCTTGCGGGTGTTGTTGCAGTTGAGGTTACCGGGGGTCCCACAATTGATTTCGCTCCTGGTAGAAGGGATTCAAAAATATCTCCTAATGAAGGGCGGCTTCCTGATGCT…	MALPVVVDAEYLKEVDKARRDLRALIANRNCAPLMLRLAWHDAGTYDAKTKTGGPNGSIRNEEEYSHGANNGLKKAIDFCEEVKEKHPKITYADLYQLAGVVAVEVTGGPTIDFAPGRRDSKISPNEGRLPDAKKGVSHLHDIFYRMGLTDRDIVALSGGHTLGRAHPERSGFDGPWTEDPLKFDNSYFVELLKEDSAGLLKLPTDKALLEDAEFRRYVELYAKDEDAFFRDYAESHKKLSELGFVPSSKPISIKDGTILAQGAVGVVVTAAVVIISYLYEVRKRGK*
D0Y65_033627	D0Y65_033627A	RZB74749	Glysoja.12G033638	Glysoja.12G033638.1	Glysoja.12G033638.1	L-ascorbate peroxidase, cytosolic isoform A [Glycine soja]	>GsoAPX12.2	12	5431487	5434903	TCAACGGCAGCAACACCACCGCAACCCCAATGGCAGCGACAATGAAAAAGGCAAACTACGGCAATGAAACGATGACAACGGCAATACCACAGCACCAACTCCCTTCACATCCATAACCAACACTACAGCAACGACGGCAACAGCACCTCCACCACAACGACTCTCCTTTCCAAGGCAACGATGGCAACACCACCAACACCTACCCTTTCTCAGATCTGAAAATCACAAACCACCCTCCTTTCTCAAATAAAACAAAAAAAAAAACGCAACGACTTTTCTCAGATATGCAAAAAGAAATACGCAATCAACACAAGAAAACAGCAGGGGCATTGTCGACATGGATGATTTTTTTTAGGATGAAGCGCGCCAATCTAACGGTCCTAAATTTCTTTCGCCACA…	ATGGGAAAGTCTTACCCAACCGTGAGCGCTGATTACCAGAAGGCCGTTGAGAAGGCGAAGAAGAAGCTCATAGGCTTCATCGCTGAGAAGAGATGCGCTCCTCTAATGCTCCGTTTGGCATGGCACTCTGCTGGAACTTACGACGTGAGCTCGAAGACCGGTGGTCCCTTCGGAACCATAAAGCACCCCTCCGAACTCGCTCACGGCGCTAACAACGGTCTTGACATCGCTGTTAGGCTTTTGGAGCCACTCAAAGCGGAGTTTCCTATTTTGAGCTACGCCGATTTCTACCAGTTGGCTGGCGTTGTTGCCGTTGAGGTCACCGGTGGACCTGAAGTTCCCTTCCATCCTGGAAGAGAGGACAAACCTGAGCCACCACCAGAGGGTCGCTTGCCCGAT…	MGKSYPTVSADYQKAVEKAKKKLIGFIAEKRCAPLMLRLAWHSAGTYDVSSKTGGPFGTIKHPSELAHGANNGLDIAVRLLEPLKAEFPILSYADFYQLAGVVAVEVTGGPEVPFHPGREDKPEPPPEGRLPDATKGSDHLRDVFGKAMGLSDRDIVALSGGHTIGAAHKERSGFEGPWTSNPLIFDNSYFKELLSGEKEGLLQLPSDKALLSDPVFRPLVEKYASDEDAFFADYAEAHQKLSELGFAEA*
D0Y65_041266	D0Y65_041266	RZB65144	Glysoja.15G041282	Glysoja.15G041282.1	Glysoja.15G041282.1	L-ascorbate peroxidase, cytosolic, partial [Glycine soja]	>GsoAPX15.1	15	17450816	17452362	CTCTCTTCCAGGGTGGAATGGAACTTCAGGTCCGCCCGTGACCTCAATGGCAATAACGCCAGCCAACTGCGTCAACACAAACACAGCATTAAGCGAACAAACACCAAAGACAAAAAAATCATCACTATCATATATAACCAATAAAAAAGGATCCCCAAAATTCTAATTTTGGAACTGTATATCTTTTGGTTTAATGTCTACATTGACTAAACAAATTAAAAACTTGAAATTTAGGGGGGAAAATGTTGAATCTCAAGTACCCGTGAATGTGCTTGTTCTAAAAAATTGAAATTTTTTGGGGCAAAACTCTCCATCCAGCAACACCCAGGCTATCAATCATATTTGTGTGTGAATCAGTTCCCATCATTTGTGTTGAGCACAACTCTACCAAGGTATTCT…	GCTTTTGGTGGTAATGTGGTGGCTATGGATAAGGACTCATGTGGAGTGGGGTTCATGGCGGAATTGTCCGACGAAAGTAGCCGCAAAACGGTGATTGATGTTTTGGAGATGCTGGTGCGCATGGACCCATCGGACATCGCTATTAGGCTTTTGGAGCCACTCAAGGCGGAGTTCCCTATTTTGAGCTACGCCGATTTCTACCCGTTGGCTAGCGTTGTTGCCGTTGAGGTCACGGGTGGACCTGAAGTTCCATTCCACCCTAGAAGAGAGTTGGCTGGCGTTGTTGACGTTGAGGTCACGGGTGGACTTGAAGTTCCATTCCACCCTCGAAGAGAGTTGGCTGGCGTTATTGCCATTGAGGTCACGGGCGGACCTGAAGTTCCATTCCACCCTGGAAGA…	AFGGNVVAMDKDSCGVGFMAELSDESSRKTVIDVLEMLVRMDPSDIAIRLLEPLKAEFPILSYADFYPLASVVAVEVTGGPEVPFHPRRELAGVVDVEVTGGLEVPFHPRRELAGVIAIEVTGGPEVPFHPGRE
D0Y65_046567	D0Y65_046567	RZB57958	Glysoja.17G046588	Glysoja.17G046588.1	Glysoja.17G046588.1	L-ascorbate peroxidase, cytosolic [Glycine soja]	>GsoAPX17.1	17	36169508	36172481	ATGTGCTCCTCTAATGCTTTGTTTGGCGTACGTTCTTTTTTATTCATTTTATTTAACATTAGATCACTGTTATTTACGATTTAGTTTATGGATTGTCCTTTTGACGTGTTTTGGTGCGTTTCGTGTGCAGATGGCACTCTGCTGGAACCTTTGACAAGGGCACAAAGACTGGCAGACCCTTCGGACATCACTATTAGGCTTTTGGAGCCACTCAAGGCGGAGTTCCCTATTTTGAGCTATGCCGATTTCTACCCGGTGATGATTTTTTTGTCTTTGGTGTTTGTGCGCTTAATGCTGTGTTTGTGTTGACGTAGTTGGCTGGCGTTGTTGTCGTTGAGGTCACGGGTGGATCTGAAGTTCCATTCCACCCTGGAAGAGAGGTATAATATTGCAAGTTTT…	ATGTGCTCCTCTAATGCTTTGTTTGGCGTACATGGCACTCTGCTGGAACCTTTGACAAGGGCACAAAGACTGGCAGACCCTTCGGACATCACTATTAGGCTTTTGGAGCCACTCAAGGCGGAGTTCCCTATTTTGAGCTATGCCGATTTCTACCCGTTGGCTGGCGTTGTTGTCGTTGAGGTCACGGGTGGATCTGAAGTTCCATTCCACCCTGGAAGAGAGTCAACCCAAATAGGAAATCAACTCAACATAACAACAATGGGAGAAGTTACATGTGGGAATGGAACTTACCAAATAGTTTGGTCTTGCGAGATGTGGAAAGAGTTGCAAACTAAGGTGGCTGAATTACCTAAGGCCAAACCTCAAAAGAGGAAACTACACCAAGGGAGAGGAGGAAAC…	MCSSNALFGVHGTLLEPLTRAQRLADPSDITIRLLEPLKAEFPILSYADFYPLAGVVVVEVTGGSEVPFHPGRESTQIGNQLNITTMGEVTCGNGTYQIVWSCEMWKELQTKVAELPKAKPQKRKLHQGRGGNYYQAAPTSGYATEHRCGVVVKGPNLSGNISGTEPLKDNRILLKAEALDDSHEARNIAAVVNELSKEITKNLVSHPVNAKCTAEGKNIANVVLLRGCGIRIEVLLLQHRYDLFVKNVMDLNFPIQKNHSGIEQSANY*
D0Y65_048550	D0Y65_048550	RZB52156	Glysoja.18G048573	Glysoja.18G048573.1	Glysoja.18G048573.1	L-ascorbate peroxidase, cytosolic, partial [Glycine soja]	>GsoAPX18.1	18	30086856	30088496	GGCACTCTGCTGGAACCTTTGACAAGGGCACAAACACTGGTGGACCCTTCGGACATCGCTATTAGGCTTTTGGAGCCACTCAAGGTGGAGTTCCCTATTTTGAGCTACGCCGATTTCTACCCGGTGATGTTTTTTTGTTTTTGGTGTTTGTGCACTTAATGTTGTGTTTGTGTTGACGCAGTTGGCTGGCGTTGTTGCCGTTGAGGTCACGGGTGGACCTGAAGTTCCATTCCACCCTGAAAGAGAGGTATAATATTGCAAGTTTTTAGTTCTCACGGTTGCTTTCTGTTATTTGATTTGATTGTGCCTTATTGTATAAAATAATAATAATAATAATAATAATAATAATAATAATAATAATAATAATATTTGGATGCTTCGTTGCTATTTTTACCTTAA…	GGCACTCTGCTGGAACCTTTGACAAGGGCACAAACACTGGTGGACCCTTCGGACATCGCTATTAGGCTTTTGGAGCCACTCAAGGTGGAGTTCCCTATTTTGAGCTACGCCGATTTCTACCCGTTGGCTGGCGTTGTTGCCGTTGAGGTCACGGGTGGACCTGAAGTTCCATTCCACCCTGAAAGAGAGGTTATGGGTTTGATCAAATGTCAAGATGATATTTTTGGAGCTACAACCAGAGCTGCCAAGGTATTTCTAGCATTCTCCTTCTTCGTATTTTTTTTTTCTGCTTCTTCAGGTATTATGTTCCAAGATATCACTACTCTATTGCTTTCTGTTGTTGCAGCAGGTATTATGTTCCAAGACATTACTATGTTATGCTTCACTGGTCGGTGA	GTLLEPLTRAQTLVDPSDIAIRLLEPLKVEFPILSYADFYPLAGVVAVEVTGGPEVPFHPEREVMGLIKCQDDIFGATTRAAKVFLAFSFFVFFFSASSGIMFQDITTLLLSVVAAGIMFQDITMLCFTGR*
D0Y65_050534	D0Y65_050534	RZB46541	Glysoja.19G050561	Glysoja.19G050561.1	Glysoja.19G050561.1	L-ascorbate peroxidase, cytosolic, partial [Glycine soja]	>GsoAPX19.1	19	8422718	8428676	AAGGCCGTTGAGAAGGCAAAGAAGCTCAGAGGCTTCATCGCTGAGAAGAGGTGCACTCCTCTAATGCTCTGTTTGGCGTGCGCTTTTTTTATTTTTTTTATTTAACATTAGATCACTGTTATTTACGATTGAGTTTATGGATTATCGTTTTGACGCATTTTGGTGTGTTTCGTGTGCAGATGGCACTCTGCTGGAACCTTTGACAAGGGCACAAACACTGGTGGACCCTTCGGACATCGCTATTAGGCTTTTGGAGCCACTCAAGGCGGAGTTCCCTATTTTGAGCTACGCCGATTTCTACCCGGTGATGTTTTTTTGTCTTTGGTGTTTGTGCGCTTAATGTTGTGTTTGTGTTGACGCAGTTGGCTGGCGTTGTTGCCGTTGAGGTCACGGGTGGAC…	AAGGCCGTTGAGAAGGCAAAGAAGCTCAGAGGCTTCATCGCTGAGAAGAGGTGCACTCCTCTAATGCTCTATGGCACTCTGCTGGAACCTTTGACAAGGGCACAAACACTGGTGGACCCTTCGGACATCGCTATTAGGCTTTTGGAGCCACTCAAGGCGGAGTTCCCTATTTTGAGCTACGCCGATTTCTACCCGTTGGCTGGCGTTGTTGCCGTTGAGGTCACGGGTGGACCTGAAGTTCCATTCCACCCTGGAAGAGAGGAAATCGTGCCACTTGAGGAAGTTTTTCAGACTCTGAGGTGTGATTCAAATGGACTCACAATAGCATCTGCAGAAAGTAACAACGACAGTACTGAAGGTGATGATGCTTAG	KAVEKAKKLRGFIAEKRCTPLMLYGTLLEPLTRAQTLVDPSDIAIRLLEPLKAEFPILSYADFYPLAGVVAVEVTGGPEVPFHPGREEIVPLEEVFQTLRCDSNGLTIASAESNNDSTEGDDA*
D0Y65_051079	D0Y65_051079	RZB47300	Glysoja.19G051106	Glysoja.19G051106.1	Glysoja.19G051106.1	L-ascorbate peroxidase, cytosolic [Glycine soja]	>GsoAPX19.2	19	35262763	35264054	ATGGACCCTTCGGACATTGGTATTAGGCTTTTGGAGCCACTCAAGGCGGAGTTCCCTATTTTGAGCTATGCCGATTTCTACCCGGTGATGATTTTTTTGTCTTTGGTGTTTGTGCGCTTAATGTTGTATTTGTGTTGACGCAATTGGTTGGCGTTGTTGCCGTTGAGGTCACGGGTGGACCTGAAGTTCCATTCCACCCTGGAAGAGAGGTATAATATCGCAAGTTTTTAGTTCTCACGGTTGGTCTCTGTTATTTGATTTTGTTATGCCTTATTGTATATAATAATAATAATAATAATAATATTGTTCTTCTTGATAATATGCAGTACCAAAATCAATTTGAATCGTTAATGATATGCAGTACCAAAATCAATTTGCTGATATAAAATACTTTTAATC…	ATGGACCCTTCGGACATTGGTATTAGGCTTTTGGAGCCACTCAAGGCGGAGTTCCCTATTTTGAGCTATGCCGATTTCTACCCGTTGGCTGGCGTTGTTGCCGTTGAGGTCACGGGCGGACCTGAAGTTCCATTCCACCCTGGAAGAGAGTCAACCCAAATAGGAAATCAAATCAACATAACAACAATGGGAGAAGTTACATGTTTCCTTTTTCAAATACTAGCACTTCAGAGGCTTAACAACAACTATGCTCTCGACTTTGTAGTTGATAGATACACATGCAACATTTGTTAA	MDPSDIGIRLLEPLKAEFPILSYADFYPLAGVVAVEVTGGPEVPFHPGRESTQIGNQINITTMGEVTCFLFQILALQRLNNNYALDFVVDRYTCNIC*

## Sheet: Lotus japonica
>Lj0g3v0077899.1 Non Characterized Hit- tr|B9RP42|B9RP42_RICCO L-ascorbate peroxidase 1, cytosolic, putative OS=Ricin,75.93,2e-19,no description,NULL; Heme-dependent peroxidases,Haem peroxidase,CUFF.3960.1	>LjaAPX3.1	MTSMIGLPSDHALVEDDECLRWIEKYAENENMFFEDFKNAYVKLVNSGVRWNSL
>Lj1g3v0250130.2 Non Characterized Hit- tr|Q012H1|Q012H1_OSTTA TL29_LYCES Putative L-ascorbate peroxidase, chloroplas,32.41,3e-16,Heme-dependent peroxidases,Haem peroxidase; no description,NULL; FAMILY NOT NAMED,NULL; seg,NULL; pe,CUFF.25409.2	>LjaAPX1.1	MGVSFLSSFSSLLPLVAHNSLPTTRYQPRSVPICCSKITADVSDGDQFHSKRRDILKCFGATIGLELIGSSGSLVGMANAADLIERGQRSEFQSKIKTTLYTAIKGNPDLVPSLLKLAINDALTYDKATKTGGPNGSIRFSSEISRPENEGLSAALNLLEEAKKEIDSYSKGGPISYADLIQYAAQSAVKATFLASAIRKCGGNVEKGNLLYTAYGSNGQWALFDRQFGRADAQDSDPEGRVPIWEKASVQEMKDKFSSVGLGPRQLAVLSAFLGPDQTATETLLASDPDVAPWVQKYQRSRETVSQTDYEVDLIAAFTKLSTLGQQINYEAYTYPRKKIDITKLKL

## Sheet: Lupan angustafolius
lupan.Tanjil.gnm1.NLL-02	lupan.Tanjil.gnm1.ann1.nnV9	gene	21149282	21150138	0.354	-	.	ID=lupan.Tanjil.gnm1.ann1.Lup032171;Name=lupan.Lup032171;source_id=Lupinus_GLEAN_10014748;part_support_id=CUFF85.432.1;Dbxref=Gene3D:G3DSA:1.10.520.10,InterPro:IPR002016,InterPro:IPR002207,InterPro:IPR010255,InterPro:IPR019794,PANTHER:PTHR31356,PANTHER:PTHR31356:SF0,PRINTS:PR00458,PRINTS:PR00459,Pfam:PF00141,Prosite:PS00436,Superfamily:SSF48113;Ontology_term=GO:0004601,GO:0006979,GO:0020037,GO:00…		>LanAPX2.1	MAKKKLRGFIAEKGCAPLILRLAWHSAGTYDVKTKTGGPFGTIKHAAELAHGANNGLDIVVRLLEPIKEQFPILSYADFDQLGGVVAVEITGGPEVPFHLGRETRRNE
lupan.Tanjil.gnm1.NLL-03	lupan.Tanjil.gnm1.ann1.nnV9	gene	27610997	27615002	0.978	+	.	ID=lupan.Tanjil.gnm1.ann1.Lup012094;Name=lupan.Lup012094;source_id=Lupinus_GLEAN_10005858;part_support_id=CUFF30.216.1;Dbxref=Gene3D:G3DSA:1.10.420.10,Gene3D:G3DSA:1.10.520.10,InterPro:IPR002016,InterPro:IPR002207,InterPro:IPR010255,InterPro:IPR019793,PANTHER:PTHR31356,PANTHER:PTHR31356:SF2,PRINTS:PR00458,PRINTS:PR00459,Pfam:PF00141,Prosite:PS00435,Prosite:PS50873,Superfamily:SSF48113;Ontology_te…	Lup012094	>LanAPX3.1	MALFGGAAAPLSARILPSATSASLSLSSSSFECLRYSPRISNLFLNQRRVSEVRVSSRGYGSISAVASDPDQLKNAREDIKELLKTKFSHPILIRLGWHDAGTYNKNIEEWPQRGGANGSLRFEVEQKHAANAGLVNALKLLQPIKDKYSNVTYADLFQLASATAVEEAGGPKIPMKYGRVDVTSPEQCPEEGRLPDAGPPSPADHLRQVFYRMGLNDKEIVALSGAHTLGRSRPDRSGWGKPETKYTKDGPGAPGGQSWTAQWLKFDNSYFKDIKEKRDEDLLVLPTDAALFEDPSFKVYAEKYAGDQEAFFKDYAEAHAKLSNLGAKFDPSEGIVIDGSPNA
lupan.Tanjil.gnm1.NLL-06	Cuff	gene	1563868	1566727	1000	+	.	ID=lupan.Tanjil.gnm1.ann1.Lup022850;Name=lupan.Lup022850;source_id=CUFF59.235.3;Dbxref=Gene3D:G3DSA:1.10.420.10,Gene3D:G3DSA:1.10.520.10,InterPro:IPR002016,InterPro:IPR002207,InterPro:IPR010255,InterPro:IPR019793,InterPro:IPR019794,PANTHER:PTHR31356,PANTHER:PTHR31356:SF0,PRINTS:PR00458,PRINTS:PR00459,Pfam:PF00141,Prosite:PS00435,Prosite:PS00436,Prosite:PS50873,Superfamily:SSF48113;Ontology_term=G…	Lup022850	>LanAPX6.1	MAKLVVDNDYLKQINKARRHLRALISTRNCAPLMLRLAWHDAGTYDDKTRTGGPNGSIRNVQELNHSANKGLQKAVEFCEEVKIKHPKVSYADLYQLAGIVAVEVTGGPTIDFIPGRKDSLDSPPEGRLPDAKQGASHLREIFYRMGLTDKDIVALSGGHTLGKAHLERSGFDGQWTRDPLKFDNSYFVELLKADSKDLLKLPTDKALVEDPKFRQYVELYATDEDVFLEDYAVSHKKLSQLGFILKPVAETRSTLAQGVIAIVIATTVVILGYLLEVNRETE
lupan.Tanjil.gnm1.NLL-07	lupan.Tanjil.gnm1.ann1.nnV9	gene	604172	608027	0.999	-	.	ID=lupan.Tanjil.gnm1.ann1.Lup016441;Name=lupan.Lup016441;source_id=Lupinus_GLEAN_10003574;part_support_id=CUFF41.316.2;Dbxref=Gene3D:G3DSA:1.10.420.10,Gene3D:G3DSA:1.10.520.10,InterPro:IPR002016,InterPro:IPR002207,InterPro:IPR010255,InterPro:IPR019793,InterPro:IPR019794,PANTHER:PTHR31356,PANTHER:PTHR31356:SF0,PRINTS:PR00458,PRINTS:PR00459,Pfam:PF00141,Prosite:PS00435,Prosite:PS00436,Prosite:PS508…	Lup016441	>LanAPX7.1	MALPVVVDSDYLKEIDKARRHLRSLIANRNCAPIMLRLAWHDAGTYDANTKTGGPNGSIRTEEEYSHGSNNGLKKAIDFCEEVKSKHPRITYADLYQLAGVVAVEVTGGPTIDFVPGRRDSKISPKEGRLPDAKKGVPHLRDIFYRMGLSDKDIVALSGGHTLGRAHPERSGFDGPWTEDPLKFDNSYYGELLKEESVGLLKLPTDKALLDDPEFRRYVELYAKDEDAFYRDYAESHKKLSELGFVPSKATSPKDATVLAQSAVGIVVTAAVVILSYLYEVRKRGK
lupan.Tanjil.gnm1.NLL-07	lupan.Tanjil.gnm1.ann1.nnV9	gene	1747427	1749770	1	+	.	ID=lupan.Tanjil.gnm1.ann1.Lup003269;Name=lupan.Lup003269;source_id=Lupinus_GLEAN_10028910;identical_support_id=CUFF7.907.1;Dbxref=Gene3D:G3DSA:1.10.420.10,Gene3D:G3DSA:1.10.520.10,InterPro:IPR002016,InterPro:IPR002207,InterPro:IPR010255,InterPro:IPR019793,InterPro:IPR019794,PANTHER:PTHR31356,PANTHER:PTHR31356:SF0,PRINTS:PR00458,PRINTS:PR00459,Pfam:PF00141,Prosite:PS00435,Prosite:PS00436,Prosite:P…	Lup003269	>LanAPX7.2	MGKSYPTVSAEYQNAVEKAKKKLRGFIAHKGSAPLILRLAWHSAGTYDVKTKTGGPFGTIKHAAELAHGANNGLDIAVRLLEPIKEQFPILTYADFYQLAGVVAVEITGGPEIPFHPGREDKPESPPEGRLPDATKGSDHLRDVFGKALGLSDQDIVALSGGHTLGAAHKERSGFEGPWTSNPLIFDNSYFKELLSGEKEGLLKLPSDTALLSDPVFRPLVEKYAEDEDAFFADYTEAHLKLSEVGFAEA
lupan.Tanjil.gnm1.NLL-08	lupan.Tanjil.gnm1.ann1.nnV9	gene	23798392	23800888	0.95	-	.	ID=lupan.Tanjil.gnm1.ann1.Lup023569;Name=lupan.Lup023569;source_id=Lupinus_GLEAN_10021120;part_support_id=CUFF61.449.2;Dbxref=Gene3D:G3DSA:1.10.420.10,Gene3D:G3DSA:1.10.520.10,InterPro:IPR002016,InterPro:IPR002207,InterPro:IPR010255,InterPro:IPR019793,InterPro:IPR019794,PANTHER:PTHR31356,PANTHER:PTHR31356:SF0,PRINTS:PR00458,PRINTS:PR00459,Pfam:PF00141,Prosite:PS00435,Prosite:PS00436,Prosite:PS508…	Lup023569	>LanAPX8.1	MGKSYPTVSADYQKAVEKAKKKLRGFIAEKGCAPLILRLAWHSAGTYDVKTKTGGPFGTIKHAAELAHGANNGLDIVVRLLEPIKEQFPILSYADFYQLGGVVAVEITGGPEVPFHLGREDKPEPPPEGRLPDAAKGSDHLRDVFGKAMGLSDQDIVALSGGHTIDKPEPPPEGRLPDAAKGSDHLRDVFGKAMGLSDQDIVALSGGHTIGAAHKERSGFEGPWTSNPLIFDNSYFKELLSGEKEGLLKLPTDTALLSDPVFRPLVEKYAADEDAFFADYSEAHLKLSELGFAEA
lupan.Tanjil.gnm1.NLL-08	lupan.Tanjil.gnm1.ann1.nnV9	gene	24731718	24735222	1	+	.	ID=lupan.Tanjil.gnm1.ann1.Lup023434;Name=lupan.Lup023434;source_id=Lupinus_GLEAN_10020984;identical_support_id=CUFF61.165.2;part_support_id=CUFF61.165.1;Dbxref=Gene3D:G3DSA:1.10.420.10,Gene3D:G3DSA:1.10.520.10,InterPro:IPR002016,InterPro:IPR002207,InterPro:IPR010255,InterPro:IPR019793,InterPro:IPR019794,PANTHER:PTHR31356,PANTHER:PTHR31356:SF0,PRINTS:PR00458,PRINTS:PR00459,Pfam:PF00141,Prosite:PS0…	Lup023434	>LanAPX8.2	MALSAAVVVDSEYTTEIDKARRDLRALIANRNCAPLMLRLAWHDAGTYDVNTNTGGPNGSIRNEEEFSHGSNNGLKKAIDFCEEVKVKHPKITYADLYQLAGVVAVEVTGGPTINFVPGRRDSKISPKEGRLPDAKKGVPHLRDIFYRMGLSDKDIVALSGGHTLGRAHPERSGFDGPWTEDPLKFDNSYFGELLKEESVGLLKLPTDKALLDDPEFRRYVELYAKDEDAFFRDYAESHKKLSELGFVPSKAASPKDATVLAQSAVGIVVTAAVVILSYLYEVRKRGK
lupan.Tanjil.gnm1.NLL-13	lupan.Tanjil.gnm1.ann1.nnV9	gene	2395765	2397695	1	+	.	ID=lupan.Tanjil.gnm1.ann1.Lup017163;Name=lupan.Lup017163;source_id=Lupinus_GLEAN_10024346;part_support_id=CUFF43.137.1;Dbxref=Gene3D:G3DSA:1.10.420.10,Gene3D:G3DSA:1.10.520.10,InterPro:IPR002016,InterPro:IPR002207,InterPro:IPR010255,InterPro:IPR019793,InterPro:IPR019794,PANTHER:PTHR31356,PANTHER:PTHR31356:SF0,PRINTS:PR00458,PRINTS:PR00459,Pfam:PF00141,Prosite:PS00435,Prosite:PS00436,Prosite:PS508…	Lup017163	>LanAPX13.1	MGKSYPTVSADYQIAVEKAKKKLRGFIAEKGCAPLILRLAWHSAGTFDVKTKSGGPFGTIKHAAELAHGANSGLDIAVRLLEPIKEQFPILTYADFYQLGGVVAVEITGGPEVPFHPGREDKPEPPPEGRLPDATKGSDHLRDVFGKAMGLSDQDIVALSGGHTLGGAHKERSGFEGPWTSNPLIFDNSYFKELLSGEKEGLLKLPSDSALLSDPVFRPLVEKYAEDEDAFFADYSEAHLKLSELGFAEA
lupan.Tanjil.gnm1.NLL-13	lupan.Tanjil.gnm1.ann1.nnV9	gene	13022092	13023642	1	+	.	ID=lupan.Tanjil.gnm1.ann1.Lup015761;Name=lupan.Lup015761;source_id=Lupinus_GLEAN_10003859;Dbxref=Gene3D:G3DSA:1.10.420.10,InterPro:IPR002016,InterPro:IPR002207,InterPro:IPR010255,InterPro:IPR019793,PRINTS:PR00459,Pfam:PF00141,Prosite:PS00435,Superfamily:SSF48113;Ontology_term=GO:0004601,GO:0006979,GO:0020037,GO:0055114;Note=ascorbate peroxidase 1%3B IPR010255 (Haem peroxidase)%3B GO:0004601 (pero…		>LanAPX13.2	MVCLFNLYDFSLVYMIYVLCCSFMQSWFKISSLALEIIHCCSDHLRDVFGKAMGLSDQDIVALSGGHTIVC
lupan.Tanjil.gnm1.NLL-15	lupan.Tanjil.gnm1.ann1.nnV9	gene	17060833	17065362	0.999	-	.	ID=lupan.Tanjil.gnm1.ann1.Lup009202;Name=lupan.Lup009202;source_id=Lupinus_GLEAN_10007689;identical_support_id=CUFF23.144.1;Dbxref=Coils:Coil,Gene3D:G3DSA:1.10.420.10,Gene3D:G3DSA:1.10.520.10,InterPro:IPR002016,InterPro:IPR002207,InterPro:IPR010255,InterPro:IPR019793,PANTHER:PTHR31356,PANTHER:PTHR31356:SF2,PRINTS:PR00458,PRINTS:PR00459,Pfam:PF00141,Prosite:PS00435,Prosite:PS50873,Superfamily:SSF4…	Lup009202	>LanAPX15.1	MAALGGATAAVSSRILPSATGASLSLSSSRSFFSFECLRSSPRISNLFLNQRRVLEVRVSSRGYGTVSAVASDLDQLKNAREDIKELLKTKFSHPILIRLGWHDAGTYNKNIEEWPQRGGANGSLRFEVEQKHAANAGLVNALKLLQPIKDKYSGVTYADLFQLAGATAVEEAGGPKIPMKYGRVDVTSPEQCPEEGRLPDAGPPSPADHLRQVFYRMGLNDKEIVALSGAHTLGRSRPDRSGWGKPETKYTKDGPGAPGGQSWTAQWLKFDNSYFKDIKEKKDEDLLVLPTDAALFDDPSFKVYAEKYAQDQEAFFKDYAEAHAKLSNLGAKFDPPEGIVIDRSPSAQGEKFVAAKYSSGKRELSDAMKQKIRAEYQAVGGSPDKPLQSNYFLNIIIV…
lupan.Tanjil.gnm1.NLL-18	lupan.Tanjil.gnm1.ann1.nnV9	gene	15924071	15926323	1	-	.	ID=lupan.Tanjil.gnm1.ann1.Lup018029;Name=lupan.Lup018029;source_id=Lupinus_GLEAN_10024199;Dbxref=Coils:Coil,Gene3D:G3DSA:1.10.420.10,Gene3D:G3DSA:1.10.520.10,InterPro:IPR002016,InterPro:IPR002207,InterPro:IPR010255,InterPro:IPR019794,PANTHER:PTHR31356,PANTHER:PTHR31356:SF0,PRINTS:PR00458,PRINTS:PR00459,Pfam:PF00141,Prosite:PS00436,Superfamily:SSF48113;Ontology_term=GO:0004601,GO:0006979,GO:002003…	Lup018029	>LanAPX18.1	MAKHVINKEYLKEIDKARRDLRALISTTNCAPLMLRLAWHDAGTYDAKTRTGGPNGSIRNVQELNHSANKGLHKAVQLCEEVKTKHPILSYADIYQLAGVVAVEVTGGPTIDFIPGRKAHLERSGYDGQWTREHLKFDNSYFVELLKADSKDLLKLPTDMALVEDPKFRKYVELYATDEDAFLEDYAASHKKLSELGLTSKHVAENGPTLAQGAIAVVIAITVVILGYLIEVNRKTK

## Sheet: M. trancatula
Gene ID	Protein ID	Functional description	Rename id	Protein
>Medtr3g107060.1 | L-ascorbate peroxidase | HC | chr3:49465089-	>Medtr3g107060.1	L-ascorbate peroxidase	>MtrAPX3.1	MMCSRVSNRIVRCASGGENSYPAKLQPSCLSTVKFRSNKPNDHASSDVSSSSRRAVIFSSIATLPCLLPLTHIFGSLQANAMPPGTKEYLLIKEELRKVLTKGKAAGVLRLVFHDAGTFEIDDNTGGMNGSIVYELERPENTGLKKSVKVLQKAKTQIDAIHPVSWADVIAVAGTEAVEVCGGPTITVSLGRQDSPGPDPEGKLPEETLDASGLKRCFHKKGFSTQELVALSGAHTLGSKGFGSPTSFDNSYYKVLLEKPWTPSGGMSTMIGLPSDHALVEDDECLRWIKKYAENENMFFEDFKNVYVKLVNSGVKWNSL*
>Medtr4g061140.1 | L-ascorbate peroxidase | HC | chr4:22583905-	>Medtr4g061140.1	L-ascorbate peroxidase	>MtrAPX4.1	MGKSYPTVSADYQKAVEKAKRKLRGFIAEKKCAPLMLRLAWHSAGTFDSKTKTGGPFGTIKHQAELAHGANNGLDIAVRLLEPLKEQFPIISYADFYQLAGVVAVEVTGGPEVPFHPGREDKPEPPPEGRLPDATKGSDHLRDVFGKAMGLSDQDIVALSGGHTIGAAHKERSGFEGPWTSNPLIFDNSYFTELLGGEKEGLLQLPSDKALLSDPVFRPLVEKYAADEDAFFADYAEAHQKLSELGFAEA*
>Medtr4g073410.1 | L-ascorbate peroxidase | HC | chr4:27800293-	>Medtr4g073410.1	L-ascorbate peroxidase	>MtrAPX4.2	MAFPVVVDSEYLKEIEKARRDLRALIANRNCAPLMLRLAWHDAGTYDAKTKTGGPNASIRNEEEFSHGANNGLKKAIDFCEEVKAKHPKISYADLYQLAGVVAVEVTGGPTVNFVPGRRDSKVCTRDGRLPDAKQGVSHLRDIFYRMGLTDKDIVALSGAHTLGRAHPERSGFDGPWTEDPLKFDNSYFQILLEEDSAALLKLPTDRALLDDPEFRRYVELYAKDEDAFFRDYAESHKKLSELGFAPSSKATAPVDATVLAQSAFGVVAAAAVVILGYLYETHKRGK*
>Medtr5g008330.1 | stromal ascorbate peroxidase, putative | LC	>Medtr5g008330.1	stromal ascorbate peroxidase, putative	>MtrAPX5.1	MWEVPSFLNPQQPNSIDEKVRKVRVSSGRFGTVAFESDPDQLKSAREDIKELLRTKFFDFV*
>Medtr5g008440.1 | L-ascorbate peroxidase | HC | chr5:1780936-1	>Medtr5g008440.1	L-ascorbate peroxidase	>MtrAPX5.2	MQTQTPALVELIETSRNVWLIFHWKSKVILEPLKEQFLIISYVDFYQLSGVVAVEITGGPEVPFHPGGEDKPEPPLEGRLPDATEGSNHLRDVFGKSMGLSDQDIVRSGFEGPWTSNPLIFDNSYFTKLLGGEKEGLLQLPSDKALLSDLVFRLLVEKYVADEDAFFADYVEARQKLFELGDEEDFRLEDESSPTWGE*
>Medtr5g022510.1 | L-ascorbate peroxidase | HC | chr5:8884381-8	>Medtr5g022510.1	L-ascorbate peroxidase	>MtrAPX5.3	MAKYAVDAEYVKEIEEVRRDLRSFITNKKCAPLMLRLAWHDAGTYDAKTRTGGPNGSIRNQQELNHAANKGLKTAVELCEEVKVKHPKVSYADLYQLAGVVAVEVTGGPTIQFVPGRKDSLESPQEGRLPDAKQGASHLREIFYRMGLTDKDIVALSGGHTLGKAHKDRSNFEGQWTRDPLKFDNSYFVELMKLESNDLLKLPTDKALVDDPAFRKYVELYAKDENAFFRDYATSHKKLSELGFNPSCSYRSQLAKAALGMVIASTVVVLGYLLELNKKIN*
>Medtr8g087680.1 | ascorbate peroxidase, putative | LC | chr8:3	>Medtr8g087680.1	ascorbate peroxidase, putative	>MtrAPX8.1	MDPTLLKLLIQRQRLVVCSEPSSTKLILLMVLVLGANNGLDIVVRLVELLKEQFPIISYSDFYQVSDYIFMEYYI*

## Sheet: Pisum sativum
pissa.Cameor.gnm1.chr2LG1	Psat_v1a	gene	127326977	127329754	.	+	.	ID=pissa.Cameor.gnm1.ann1.Psat2g069720;idevm=EVM_all_unmasked.36589.path1;idevm_pasa=EVM_PASA.2852;id_v1=Psat2g091400;Note=ascorbate peroxidase 4	Psat2g069720	>PsaAPX2.1	MGVSFLSISSLPSLHPLLGSHYPKTTTTTHQPRFVSICCAKIKTDVSDEEEQQFHWKRRDFLKCIGVTIGLESVTNSGLLVGKADAADLIERRQRSDFQSEIKGTLYNAIKGNPDIVPSLLTLAINDALTYDKATKTGGPNGSIRFSSEISRPENKGLSAALNFIEEAKKEIDSYSKGGPISYADLIQYAAQSATKATFLASAIRKCGGNVEKGNLLYTAYGSNGQWGLFDRQFGRADTQEPDPEGRIPIWEKASVQEMKDKFSAVGLGPRQLAVLSAFIGPDQDATEALLASDPDVAPWVQKYQRSRETVSRTDYEVDLITTFTKLSTLGQKINYEAYTYPRKKIDITKLKL
pissa.Cameor.gnm1.chr2LG1	Psat_v1a	gene	383459970	383462058	.	+	.	ID=pissa.Cameor.gnm1.ann1.Psat2g153360;idevm=EVM_all_unmasked.17588.path1;idevm_pasa=EVM_PASA.23738;id_v1=Psat2g147050;Note=ascorbate peroxidase 3	Psat2g153360	>PsaAPX2.2	MAQYRVDAEYVKEIEKTRSDLRSLISRKKCAPLMLRLAWHDAGTYDAKTRTGGPNGSIRNQQELNHSANKGLEIAVELCEEVKAKHLQISYADLYQLAGVVAVEVTGGPAIHFVPGRKDSLESPEEGRLPDAKQGASHLREVFYRMGLNDGDIVALSGGHTLGKAHKDRSGFEGQWTRDPLKFDNSYFVELLKSESKDLLKLPTDKVLVEDPKFHKYVELYAKDEKAFFRDYAKSHKKLSELGFNPNCNYRSKLAKAVLGVVIASTVVVLGYLLELNKKIN
pissa.Cameor.gnm1.chr5LG3	Psat_v1a	gene	156280354	156288271	.	-	.	ID=pissa.Cameor.gnm1.ann1.Psat5g086720;idevm=EVM_all_unmasked.22901.path1;idevm_pasa=EVM_PASA.36844;id_v1=Psat5g104350;Dbxref=Gene3D:G3DSA:1.10.420.10,Gene3D:G3DSA:1.10.520.10,InterPro:IPR002016,InterPro:IPR002207,InterPro:IPR010255,InterPro:IPR019793,PANTHER:PTHR31356,PANTHER:PTHR31356:SF2,PRINTS:PR00458,PRINTS:PR00459,Pfam:PF00141,Prosite:PS00435,Prosite:PS50873,Superfamily:SSF48113;Ontology_te…	Psat5g086720	>PsaAPX5.1	MAERVLLTPSLPLPSRPSVSPTTMATVTGGAAARIIPSATRATVSLSSSSRSFFSFSSSSTSVSSLKCLRSSPRISHLFLDQRRSEVRVSSGRFGTVSALASDPDQLKSAREDIKELLSTKFCHPLLIRLGWHDAGTYNKNIEEWPQRGGANGSLRFEAELKHGANAGLVNALKLLQPIKDKYSGVTYADLFQLAGATAVEEAGGPKIPMKYGRVDTSGPEQCPEEGRLPDAGPPSPADHLREVFYRMGLDDKEIVALSGAHTLGRSRPDRSGWGKPETKYTKDGPGAPGGQSWTAQWLKFDNSYFKDIKEKRDEDLLVLPTDAALFEDPSFKVYAEKYAEDQEAFFKDYAEAHAKLSNLGAKFDPPEGIVIDGSPNVKGEKFVAAKYSSGKE
pissa.Cameor.gnm1.chr7LG7	Psat_v1a	gene	448120612	448124208	.	+	.	ID=pissa.Cameor.gnm1.ann1.Psat7g223000;idevm=EVM_all_unmasked.6762.path1;idevm_pasa=EVM_PASA.39990;id_v1=Psat7g259250;Dbxref=Gene3D:G3DSA:1.10.420.10,Gene3D:G3DSA:1.10.520.10,InterPro:IPR002016,InterPro:IPR002207,InterPro:IPR010255,InterPro:IPR019793,InterPro:IPR019794,PANTHER:PTHR31356,PANTHER:PTHR31356:SF0,PRINTS:PR00458,PRINTS:PR00459,Pfam:PF00141,Prosite:PS00435,Prosite:PS00436,Prosite:PS5087…	Psat7g223000	>PsaAPX7.1	MGKSYPTVSPDYQKAIEKAKRKLRGFIAEKKCAPLILRLAWHSAGTFDSKTKTGGPFGTIKHQAELAHGANNGLDIAVRLLEPIKEQFPIVSYADFYQLAGVVAVEITGGPEVPFHPGREDKPEPPPEGRLPDATKGSDHLRDVFGKAMGLSDQDIVALSGGHTIGAAHKERSGFEGPWTSNPLIFDNSYFTELLTGEKDGLLQLPSDKALLTDSVFRPLVEKYAADEDVFFADYAEAHLKLSELGFAEA
pissa.Cameor.gnm1.scaffold04922	Psat_v1a	gene	28391	33088	.	+	.	ID=pissa.Cameor.gnm1.ann1.Psat0s4922g0040;idevm=EVM_all_unmasked.43853.path1;idevm_pasa=EVM_PASA.39884;id_v1=Psat0s4435g0100;Note=ascorbate peroxidase 3			MALPVVVDAEYLKQIEKARRDLRALIANRNCAPLMLRLAWHDAGTYDATSKTGGPNGSIRNEEEYSHGANNGLKKAIDFCEEVKANHPKISYADLYQLAGVVAVEVTGGPTVNFVPGRRDSKICTRDGRLPDAKKGESHLRDIFYRMGLTDKDIVALSGAHTLGRAHPERSGFDGAWTEDPLKFDNSYFEILLEEDSAGLLKLPTDRALVDDNEFRHYVELYAKDEDAFFRDYAESHKKLSELGFVPSSKVNAPKDATVLAQSAVGVVVAAAVVILAYLSEHSKRGK

[truncated: 4 more sheets: Phesealous vulgares, Vigna radiata, Vigna angularis, Vigna unguculata]
