# Supplementary material for: Whole-Genome Identification of APX and CAT Gene Families in Cultivated and Wild Soybeans and Their Regulatory Function in Plant Development and Stress Response
Source: Antioxidants (Basel). 2022 Aug 22;11(8):1626. doi: 10.3390/antiox11081626 (PMC9404807; doi:10.3390/antiox11081626)
Supplement: Supplementary file 1 [file antioxidants-11-01626-s001.zip › Table S2.xlsx]

## Sheet: Sheet1
General function	Specific function	Cis-elements	GmaAPX1.1	GmaAPX11.1	GmaAPX11.2	GmaAPX11.3	GmaAPX11.4	GmaAPX12.1	GmaAPX12.2	GmaAPX14.1	GmaAPX2.1	GmaAPX4.1	GmaAPX6.1	GsoAPX1.1	GsoAPX11.1	GsoAPX11.2	GsoAPX11.3	GsoAPX11.4	GsoAPX12.1	GsoAPX12.2	GsoAPX4.1	GsoAPX6.1	GsoAPX6.2
Light responsive	Light responsive elements	3-AF3 binding site				1		1									1		1
Growth and development	Endospermic specific negative expersion	AACA_motif
Unknown	Unknown	AAGAA-motif	1	2			1	1		3	3		1	1	1			2	1			1	1
Hormone	ABA responsive	ABRE	3		3	3	3	3	1	1		1	2	5		3	1	2	2	1	1	1	2
Hormone	ABA responsive	ABRE3a	1		2	2	1	1						1		2		1
Hormone	ABA responsive	ABRE4	1		2	2	1	1						1		2		1
Growth and development	Tissue specific/ preferential expresses	AC-I			1		1	1		1						1			1		1	1
Light responsive	Light responsive	AE-box			1			1		1						1			2		1		1
Unknown	Unknown	AP-1			1											1
Abiotic stress	Anoxic response	ARE		2	1	1	1	1	6	1	6	1	5	1	2	1	2	1	2	7	1	1	5
Abiotic stress	Drought responsive	as-1				2	4	2	1	1		2	3				3	3	2	1	2	2	3
Transcription	promoter	AT~TATA-box	3	6	21	8	6	4		3	10	2	5	3	6	20	8	11	4		12	2	4
Light responsive	light responsive	ATCT-motif				1									1		1					1
Abiotic stress	Water responsivr	AT-rich element					1											1
Biotic stress	Element for maximal elicitor-mediated activation	AT-rich sequence			1											1
Hormone	Auxin responsiveness	AuxRR-core								1
Light responsive	part of a conserved DNA module involved in light responsiveness	Box 4	6	2	5		8	2		3	6	3	4	7	2	5		9	2		3		4
Light responsive	part of a light responsive element	Box II		1											1
Unknown	Unknown	Box II -like sequence
Transcription	protein binding site	Box III			1											1
Biotic stress	Wounding and pathogen responsive	box S
Transcription	promoter and enhancer regions	CAAT-box	46	37	37	39	45	39	35	40	49	38	36	43	39	37	38	42	40	32	34	36	35
Hormone	ABA responsive	CARE							1				1										1
Growth and development	Meristem expression	CAT-box			1	1										1	1			1		1
Abiotic stress	MYBHv1 binding site	CCAAT-box		1			1		4			1			1					2
Hormone	MeJA-responsive element	CGTCA-motif				2	4	2	1	1		2	3				3	3	2	1	2	2	3
Light responsive	part of a light responsive element	chs-CMA1a	1		1					1	1		1	2		1							1
Light responsive	part of a light responsive element	chs-CMA2a					1											1
Hormone	Circadian	circadian												2	1							1
	Unknown	CTAG-motif	1						1					1						1	1
Abiotic stress	Drought responsive	DRE1																				1
Hormone	Ethylene responsive element	ERE	4	3	1	1	1		1	2	4	1	6	4	3	1	1	2	1	1	1		8
	unknown	F-box									1
Light responsive	light responsive	GA-motif																	1
Light responsive	light responsive element	Gap-box				1											1
Hormone	gibberellin-responsive element	GARE-motif								1		1									1
Light responsive	part of a light responsive element	GATA-motif			2											2		1
Light responsive	cis-acting regulatory element involved in light responsiveness	G-Box	5		4	4	3	3	1	1		1	2	6		4	1	2	2	1	1	1	2
Abiotic stress	anoxic specific inducibility	GC-motif										1									1
Growth and development	cis-regulatory element involved in endosperm expression	GCN4_motif			2	1										2	1					1
Light responsive	light responsive element	GT1-motif		2	2	1	2	1	4	1	1	1	2		2	2	1			5			2
Light responsive	light responsive element	GTGGC-motif						1											1
Growth and development	element involved in differentiation of the palisade mesophyll cells	HD-Zip 1	1											1
Transcription	protein binding site	HD-Zip 3				1		1									1		1
Light responsive	part of a light responsive element	I-box							1	1	1		1							1			1
Light responsive	part of a light responsive element	LAMP-element		1											1
Light responsive	part of a light responsive element	L-box			1											1
Abiotic stress	cis-acting element involved in low-temperature responsiveness	LTR		1	1	1						1	1		1	1					1	1
Abiotic stress	MYB binding site involved in drought-inducibility	MBS			2	1		1				1				2	1		1		1	2
Metabolism	MYB binding site involved in flavonoid biosynthetic genes regulation	MBSI					1											1
Abiotic stress	MYB binding site involved in light responsiveness	MRE	1			1		1	4								1		1	4		1
Cell cycle	cis-acting element involved in cell cycle regulation	MSA-like							1											1
Abiotic stress	Water responsivr	Myb	1	4	6	6	4	5	8	4	4	6	4	1	3	6	3	5	4	10	5	5	5
Abiotic stress	Drought responsive	MYB recognition site		1			1		4			1			1					2
Cell cycle	Cell cycle and prolifiration	Myb-binding site		1	1				1	1		1				1					1	2
	Unknown	MYB-like sequence		1		2	3	1	3	1	1	3	3		1			3		4	2		2
Abiotic stress	Drought responsive	MYC	4	7	3	6	2	6	5	2	2	5	2	4	7	3	6	2	9	6	4	4	3
Metabolism	Cis-acting regulatory element involved in zein metabolism regulation	O2-site							1				1							1
Hormone	gibberellin-responsive element	P-box		2	1								1		2	1						1
		re2f-1					1											1
		RY-element		1											1
Light responsive	light responsive element	Sp1	1											1
	Unknown	STRE	2		4	1	2	2	1	3	4	1	1	2		4		1	4		1	4	1
Transcription	Core promoter/ enhancer element	TATA	4	1	1	3					2			4		1	3	1
Transcription	Core promoter/ enhancer element	TATA-box	77	72	101	78	68	50	25	53	87	41	62	80	68	99	77	84	43	29	66	45	62
Hormone	gibberellin-responsive element	TATC-box											1									1	1
Hormone	cis-acting element involved in salicylic acid responsiveness	TCA		3											2
Hormone	cis-acting element involved in salicylic acid responsiveness	TCA-element		1	1	1		1		1					1	1	2		1			2
Light responsive	part of a light responsive element	TCCC-motif			1		1		1	1		1				1				1	1
Biotic stress	cis-acting element involved in defense and stress responsiveness	TC-rich repeats	2							1		1									1
Biotic stress	cis-acting element involved in defense and stress responsiveness	TCT-motif	1		1			1						1		1	1		1
Hormone	cis-acting regulatory element involved in the MeJA-responsiveness	TGACG-motif				2	4	2	1	1		2	3				3	3	2	1	2	2	3
Hormone	auxin-responsive element	TGA-element		1					4						1					2	1
		Unnamed__1
		Unnamed__10
Biotic stress	wound and pathogen response	W box		1					1				1		1					1			1
Biotic stress	wound and pathogen response	WRE3				2		1		1		3					1		1		3	1
Biotic stress	wound and pathogen response	WUN-motif	1	3					1	2				3				3			1	2

## Sheet: Sheet2
General function	Specific function	Cis elements	GmaAPX1.1	GmaAPX2.1	GmaAPX4.1	GmaAPX6.1	GmaAPX11.1	GmaAPX11.2	GmaAPX11.3	GmaAPX11.4	GmaAPX12.1	GmaAPX12.2	GmaAPX14.1	GsoAPX1.1	GsoAPX4.1	GsoAPX6.1	GsoAPX6.2	GsoAPX11.1	GsoAPX11.2	GsoAPX11.3	GsoAPX11.4	GsoAPX12.1	GsoAPX12.2	G. max	G.soja
Abiotic stress	Anoxic response	ARE		6	1	5	2	1	1	1	1	6	1	1	1	1	5	2	1	2	1	2	7	25	23
Abiotic stress	Drought responsive	as-1			2	3			2	4	2	1	1		2	2	3			3	3	2	1	15	16
Abiotic stress	Water responsivr	Myb	1	4	6	4	4	6	6	4	5	8	4	1	5	5	5	3	6	3	5	4	10	52	47
Abiotic stress	Drought responsive	MYC	4	2	5	2	7	3	6	2	6	5	2	4	4	4	3	7	3	6	2	9	6	44	48
Abiotic stress	Stress Responsive elements	STRE	2	4	1	1		4	1	2	2	1	3	2	1	4	1		4		1	4		21	17
Biotic stress	wound and pathogen response	WUN-motif	1				3					1	2	3	1	2					3			7	9
Light responsive	part of a conserved DNA module involved in light responsiveness	Box 4	6	6	3	4	2	5		8	2		3	7	3		4	2	5		9	2		39	32
Light responsive	cis-acting regulatory element involved in light responsiveness	G-Box	5		1	2		4	4	3	3	1	1	6	1	1	2		4	1	2	2	1	24	20
Light responsive	light responsive element	GT1-motif		1	1	2	2	2	1	2	1	4	1				2	2	2	1			5	17	12
Transcription	promoter	AT~TATA-box	3	10	2	5	6	21	8	6	4		3	3	12	2	4	6	20	8	11	4		68	70
Transcription	promoter and enhancer regions	CAAT-box	46	49	38	36	37	37	39	45	39	35	40	43	34	36	35	39	37	38	42	40	32	441	376
Transcription	Core promoter/ enhancer element	TATA-box	77	87	41	62	72	101	78	68	50	25	53	80	66	45	62	68	99	77	84	43	29	714	653
Hormone	ABA responsive	ABRE	3		1	2		3	3	3	3	1	1	5	1	1	2		3	1	2	2	1	20	18
Hormone	MeJA-responsive element	CGTCA-motif			2	3			2	4	2	1	1		2	2	3			3	3	2	1	15	16
Hormone	Ethylene responsive element	ERE	4	4	1	6	3	1	1	1		1	2	4	1		8	3	1	1	2	1	1	24	22
Hormone	cis-acting regulatory element involved in the MeJA-responsiveness	TGACG-motif			2	3			2	4	2	1	1		2	2	3			3	3	2	1	15	16
