# Supplementary material for: Whole-Genome Identification of APX and CAT Gene Families in Cultivated and Wild Soybeans and Their Regulatory Function in Plant Development and Stress Response
Source: Antioxidants (Basel). 2022 Aug 22;11(8):1626. doi: 10.3390/antiox11081626 (PMC9404807; doi:10.3390/antiox11081626)
Supplement: Supplementary file 1 [file antioxidants-11-01626-s001.zip › Table S3.xlsx]

## Sheet: Sheet1
General function	Specific function		GmaCAT4.1	GmaCAT6.1	GmaCAT14.1	GmaCAT17.1	GsoCAT4.1	GsoCAT6.1	GsoCAT14.1	GsoCAT17.1
Light responsive	Light responsive elements	3-AF1 binding site		1				1
	Unknown	AAGAA-motif	2	1	2	1	1		1	1
Food synthesis	amylase activity	A-box			1		1
Hormone	ABA responsive	ABRE		3	1			2	1
Hormone	ABA responsive	ABRE3a		1	1				1
Hormone	ABA responsive	ABRE4		1	1				1
		ACA-motif						1
Light responsive	cis-acting element involved in light responsiveness	ACE			1			1	1
Light responsive	Light responsive	AE-box
		AP-1	1				1
Abiotic stress	Anoxic response	ARE	3	2	1	3	3	1	1	2
Abiotic stress	Drought responsive	as-1	3	2	2	1	3	2	2	1
Transcription	promoter	AT~TATA-box	5	7	20	1	5	8	19	1
Light responsive	Light responsive	AT1-motif	1				1
Light responsive	light responsive	ATCT-motif		1
Abiotic stress	Water responsivr	AT-rich element	1				1
Biotic stress	Element for maximal elicitor-mediated activation	AT-rich sequence	2	1	1	1	2	1	1	1
		AuxRE		1				1
Hormone	Auxin responsiveness	AuxRR-core		1	1			1	1
Light responsive	part of a conserved DNA module involved in light responsiveness	Box 4	4	1	5	5	4	2	5	6
Transcription	protein binding site	Box III				1				1
Transcription	promoter and enhancer regions	CAAT-box	46	46	30	24	47	41	33	25
Growth and development	Meristem expression	CAT-box			1			1	1
Abiotic stress	MYBHv1 binding site	CCAAT-box	1				1
Cell cycle	Cell cycle and prolifiration	CCGTCC motif			1				1
Growth and development	Cis-acting regulatory element related to meristem specific activation	CCGTCC-box			1				1
Hormone	MeJA-responsive element	CGTCA-motif	3	2	3	1	3	2	2	1
Light responsive	part of a light responsive element	chs-CMA1a	2	1		1	2	1		1
Light responsive	part of a light responsive element	chs-CMA2a
Hormone	Circadian	circadian
Cell cycle	Ethylene responsive element	ERE	3		4	4	3		4	5
Light responsive	light responsive	GA-motif			2				2
Hormone	gibberellin-responsive element	GARE-motif		1				1
Light responsive	part of a light responsive element	GATA-motif			2	2			2	3
Light responsive	cis-acting regulatory element involved in light responsiveness	G-box		4	1			3	1
Growth and development	cis-regulatory element involved in endosperm expression	GCN4_motif		1
Light responsive	light responsive element	GT1-motif		1				1
Transcription	protein binding site	HD-Zip 3						1
Light responsive	part of a light responsive element	LAMP-element	1		1		1		1
Abiotic stress	cis-acting element involved in low-temperature responsiveness	LTR		1	1				1
Abiotic stress	MYB binding site involved in drought-inducibility	MBS		1		1		2		1
Metabolism	MYB binding site involved in flavonoid biosynthetic genes regulation	MBSI				1
Abiotic stress	MYB binding site involved in light responsiveness	MRE	1				1
Abiotic stress	Water responsivr	MYB	2	6	4	3	2	9	4	4
Abiotic stress	Drought responsive	MYB recognition site	1				1
Cell cycle	Cell cycle and prolifiration	Myb-binding site		1		1		1		1
	Unknown	MYB-like sequence	1	2	1	1	1		1	1
Abiotic stress	Drought responsive	MYC	5	6	1	2	5	5	1	2
Metabolism	Cis-acting regulatory element involved in zein metabolism regulation	O2-site		2		1		1		1
Hormone	gibberellin-responsive element	P-box				2				2
		re2f-1			1				1
	Unknown	STRE			1	3			1	4
Transcription	Core promoter/ enhancer element	TATA	2	1	4	3	2	1	3	3
Transcription	Core promoter/ enhancer element	TATA-box	65	48	96	53	65	53	96	55
Hormone	cis-acting element involved in salicylic acid responsiveness	TCA	1			1	1			1
Hormone	cis-acting element involved in salicylic acid responsiveness	TCA-element		1				1
Biotic stress	cis-acting element involved in defense and stress responsiveness	TC-rich repeats	2	3			2	1		1
Biotic stress	cis-acting element involved in defense and stress responsiveness	TCT-motif	2			1	2			1
Hormone	Auxin responsiveness	TGA-box	1	1			1	1
Hormone	cis-acting regulatory element involved in the MeJA-responsiveness	TGACG-motif	3	2	2	1	3	2	2	1
Hormone	auxin-responsive element	TGA-element						2		1
Biotic stress	wound and pathogen response	W box			2		1		2
Biotic stress	wound and pathogen response	WRE3				1				1
Biotic stress	wound and pathogen response	WUN-motif				1			1	1

## Sheet: Sheet2
General function	Specific function		GmaCAT4.1	GmaCAT6.1	GmaCAT14.1	GmaCAT17.1	GsoCAT4.1	GsoCAT6.1	GsoCAT14.1	GsoCAT17.1	G. max	G. soja
Abiotic stress	Anoxic response	ARE	3	2	1	3	3	1	1	2	9	7
Abiotic stress	Drought responsive	as-1	3	2	2	1	3	2	2	1	8	8
Abiotic stress	Water responsivr	MYB	2	6	4	3	2	9	4	4	15	19
Abiotic stress	Drought responsive	MYC	5	6	1	2	5	5	1	2	14	13
Abiotic stress	Unknown	STRE			1	3			1	4	4	5
Biotic stress	Element for maximal elicitor-mediated activation	AT-rich sequence	2	1	1	1	2	1	1	1	5	5
Biotic stress	cis-acting element involved in defense and stress responsiveness	TC-rich repeats	2	3			2	1		1	5	4
Light responsive	part of a conserved DNA module involved in light responsiveness	Box 4	4	1	5	5	4	2	5	6	15	17
Light responsive	part of a light responsive element	GATA-motif			2	2			2	3	4	5
Light responsive	cis-acting regulatory element involved in light responsiveness	G-box		4	1			3	1		5	4
Transcription	promoter	AT~TATA-box	5	7	20	1	5	8	19	1	33	33
Transcription	promoter and enhancer regions	CAAT-box	46	46	30	24	47	41	33	25	146	146
Transcription	Core promoter/ enhancer element	TATA	2	1	4	3	2	1	3	3	10	9
Transcription	Core promoter/ enhancer element	TATA-box	65	48	96	53	65	53	96	55	262	269
Cell cycle	Ethylene responsive element	ERE	3		4	4	3		4	5	11	12
Hormone	MeJA-responsive element	CGTCA-motif	3	2	3	1	3	2	2	1	9	8
Hormone	cis-acting regulatory element involved in the MeJA-responsiveness	TGACG-motif	3	2	2	1	3	2	2	1	8	8
