# Supplementary material for: Whole-Genome Identification of APX and CAT Gene Families in Cultivated and Wild Soybeans and Their Regulatory Function in Plant Development and Stress Response
Source: Antioxidants (Basel). 2022 Aug 22;11(8):1626. doi: 10.3390/antiox11081626 (PMC9404807; doi:10.3390/antiox11081626)
Supplement: Supplementary file 1 [file antioxidants-11-01626-s001.zip › Table S4.xlsx]

## Sheet: ARACHIS DURANESIS
>aradu.V14167.gnm1.ann1.Aradu.FBG4E.1 AMP-dependent synthetase and ligase family protein; IPR000873 (AMP-dependent synthetase/ligase), IPR009081 (Acyl carrier protein-like), IPR011004 (Trimeric LpxA-like), IPR011614 (Catalase core domain), IPR018028 (Catalase, mono-functional, haem-containing), IPR020835 (Catalase-like domain); GO:0003824 (catalytic activity), GO:0004096 (catalase activity), GO:0…	Aradu.FBG4E.1	LOC107478167	3	>AduCAT3.1	MDLKIPIDDQFSKLHPSLPLSTRIGIVGAGPSGLSAAYALSRLGYNNVTVLEKHHTVAGMCESVEIEGKIYDLGGQVLAANSTPVIFHLAKETGSELEEMDSHKLALIDPCSGKFQDVNVADDYVSVMTLTLDIQEKVKNSKHFGIHAVSQVASDLTTDYLESHGLKSVPKSVAYGYTASGFGFVQDLPYAYIHEFTRTSMAGKIRRFKGGYTSLWKKIAESLPIKLHCNTQVLAIRRSSESVKVTVKRLNENEKTMEFDKIIISGNFPLRYGRTYGSVPSAFTDSEEEVMDATELEKDLFSKVETFDYYTTVFKIKGFEHLPIGFFYFGEYMEDPNTIGNPVAMQKFYDDSDIFLFWSYGNSSDIKGPTVIELAIKAVESMGGKIDKFILQRRFKYFP…
>aradu.V14167.gnm1.ann1.Aradu.8PB60.1 catalase 2; IPR010582 (Catalase immune-responsive domain), IPR011614 (Catalase core domain), IPR018028 (Catalase, mono-functional, haem-containing), IPR020835 (Catalase-like domain); GO:0004096 (catalase activity), GO:0006979 (response to oxidative stress), GO:0020037 (heme binding), GO:0055114 (oxidation-reduction process)	Aradu.8PB60.1	LOC107460209	8	>AduCAT8.1	KACGLLTKTQGSCCVDSHTTVEYGSLLYPSNTMDPYKYRPSSAFNTPFWTTNSGNPVWNNNSVLTVGNRGPILLEDYQFVEKLANFDRERIPERVVHARGASAKGFFEVTHDVSHLTCADFLRAPGVQTPVIVRFSTVIHERGSPETIRDPRGFATKFYTREGNFDLVGNNFPVFFIRDAMKFPDVIHAFKPNPKSNVQENWRILDFLSHHPESFNTFTWFYDDVGIPINYRHMEGFGVHTYTLLNKAGKVLYVKFHWKPTCGVKSLLEEEAIRIGGTNHSHATQDLYDSIAAGNYPEWKLYFQTMDPDHEDNFDFDPLDTTKTWPEDILPLQPVGRLVLNKNIDNFFAENEMLAFSMHVVPGISYSNDKMLQGRIFAYADTQRHRLGPNYLQIPVNAP…
>aradu.V14167.gnm1.ann1.Aradu.60HCE.1 catalase 2; IPR010582 (Catalase immune-responsive domain), IPR011614 (Catalase core domain), IPR018028 (Catalase, mono-functional, haem-containing), IPR020835 (Catalase-like domain); GO:0004096 (catalase activity), GO:0006979 (response to oxidative stress), GO:0020037 (heme binding), GO:0055114 (oxidation-reduction process)	Aradu.60HCE.1	LOC107460207	8	>AduCAT8.2	MDPYKYRPSSAFNSPFWTTNSGAPVWNNNSSLTVGNRGPILLEDYHLVEKLANFDRERIPERVVHARGASAKGFFEVTHDITHLSCADFLRAPGVQTPVIVRFSTVIHERGSPETLRDPRGFAVKFYTREGNFDLVGNNFPVFFVRDGMKFPDMVHALKPNPKSHIQENWRILDFFSHHPESLHMFTFLFDDVGVPQDYRHMDGSGVNTYTLINKAGKVHYVKFHWRPTCGVKCLLEDDAVKVGGSNHSHATQDLYDSIAAGNYPEWKLYIQTIDPDHEDKFDFDPLDVTKTWPEDILPLQPVGRLVLNKNIDNFFAENEQIAFCPAIVVPGVYYSDDKLLQTRIFSYSDTQRHRLGPNYLQLPVNAPKCAHHNNHHEGFMNFMHRDEEINYFPSRYDP…

## Sheet: A. thaliana
>AT1G20630.1	(SMOO1060, PF06628)	catalase 1 | chr1:7146812-7149609 FORWARD LENGTH=492	>AtCAT1.2	MDPYRVRPSSAHDSPFFTTNSGAPVWNNNSSLTVGTRGPILLEDYHLLEKLANFDRERIPERVVHARGASAKGFFEVTHDITQLTSADFLRGPGVQTPVIVRFSTVIHERGSPETLRDPRGFAVKFYTREGNFDLVGNNFPVFFVRDGMKFPDMVHALKPNPKSHIQENWRILDFFSHHPESLHMFSFLFDDLGIPQDYRHMEGAGVNTYMLINKAGKAHYVKFHWKPTCGIKCLSDEEAIRVGGANHSHATKDLYDSIAAGNYPQWNLFVQVMDPAHEDKFDFDPLDVTKIWPEDILPLQPVGRLVLNKNIDNFFNENEQIAFCPALVVPGIHYSDDKLLQTRIFSYADSQRHRLGPNYLQLPVNAPKCAHHNNHHDGFMNFMHRDEEVNYFPSRLDP…
>AT4G35090.1	(SMOO1060, PF06628)	catalase 2 | chr4:16700937-16703215 REVERSE LENGTH=492	>AtCAT4.1	MDPYKYRPASSYNSPFFTTNSGAPVWNNNSSMTVGPRGPILLEDYHLVEKLANFDRERIPERVVHARGASAKGFFEVTHDISNLTCADFLRAPGVQTPVIVRFSTVIHERGSPETLRDPRGFAVKFYTREGNFDLVGNNFPVFFIRDGMKFPDMVHALKPNPKSHIQENWRILDFFSHHPESLNMFTFLFDDIGIPQDYRHMDGSGVNTYMLINKAGKAHYVKFHWKPTCGVKSLLEEDAIRVGGTNHSHATQDLYDSIAAGNYPEWKLFIQIIDPADEDKFDFDPLDVTKTWPEDILPLQPVGRMVLNKNIDNFFAENEQLAFCPAIIVPGIHYSDDKLLQTRVFSYADTQRHRLGPNYLQLPVNAPKCAHHNNHHEGFMNFMHRDEEVNYFPSRYDQ…
AT1G20620	(SMOO1060, PF06628)	Catalase 3	>AtCAT1.1	MDPYKYRPSSAYNAPFYTTNGGAPVSNNISSLTIGERGPVLLEDYHLIEKVANFTRERIPERVVHARGISAKGFFEVTHDISNLTCADFLRAPGVQTPVIVRFSTVVHERASPETMRDIRGFAVKFYTREGNFDLVGNNTPVFFIRDGIQFPDVVHALKPNPKTNIQEYWRILDYMSHLPESLLTWCWMFDDVGIPQDYRHMEGFGVHTYTLIAKSGKVLFVKFHWKPTCGIKNLTDEEAKVVGGANHSHATKDLHDAIASGNYPEWKLFIQTMDPADEDKFDFDPLDVTKIWPEDILPLQPVGRLVLNRTIDNFFNETEQLAFNPGLVVPGIYYSDDKLLQCRIFAYGDTQRHRLGPNYLQLPVNAPKCAHHNNHHEGFMNFMHRDEEINYYPSKFDP…

## Sheet: cicer ariantunum
Ca_04835	5	GO:0004096; catalase activity; Molecular Function	>cicar.CDCFrontier.gnm1.ann1.Ca_04835.1 locus=Ca5:31329774:3133	5	>CarCAT5.1	MDPYKHRPSSAFNSPFWTTNSGAPVWNNNSSLTVGSRGPILLEDYHLVEKLANFDRERIPERVVHARGASAKGFFEVTHDVSHLTCADFLRAPGVQTPVIVRFSTVIHERGSPETLRDPRGFAVKFYTREGNFDLVGNNFPVFFVHDGMKFPDMVHALKPNPKSHIQENWRILDFFSHFPESLHMFSFLFDDVGVPQDYRHMDGFGVNTYTLINKAGKALYVKFHWKPTCGVKSLLEEEAIKVGGANHSHATQDLYESIAAGNYPEWKLYIQTIDPDHEDRFDFDPLDVTKTWPEDIIPLQPVGRLVLNKNIDNFFAENEQLAFCPAIIVPGVYYSDDKMLQTRIFSYADSQRHRLGPNYLQLPANAPKCAHHNNHHEGFMNFIHRDEEVNYFPSRHDP…

## Sheet: CAJANUS SJAN
catalase 4	1	cajca.ICPL87119.gnm1.Cc06	genscan	gene	1165063	1186763	.	-	ID=cajca.ICPL87119.gnm1.ann1.C.cajan_11129;Name=cajca.C.cajan_11129;evid_id=G056947;Dbxref=Gene3D:G3DSA:2.40.180.10,InterPro:IPR002226,InterPro:IPR010582,InterPro:IPR011614,InterPro:IPR018028,InterPro:IPR020835,InterPro:IPR024708,PANTHER:PTHR11465,PANTHER:PTHR11465:SF0,PRINTS:PR00067,Pfam:PF00199,Pfam:PF06628,Prosite:PS00437,Prosite:PS00438,Prosite:PS51402,SMART:SM01060,Superfamily:SSF56634;Ontol…	C.cajan_11129	>CcaCAT6.1	MVVTNSQEKAYFLVRITNYMSYGFLDVEESQGRNRPSSAFNSPFWTTNSGAPIWNNNSSLTVGSRGPILLEDYHLVEKLANFDRERIPERVVHARGASAKGFFEVTHDISHLTCADFLRAPGVQTPVIVRFSTVIHERGSPETLRDPRGFAVKFYTREGNFDLVGNNFPVFFVRDGLKFPDMVHALKPNPKSHIQEDWRILDFFSHHPESLHMFSFLFDDLGVPQDYRHMDGFGVNTYTLINKAGKALYVKFHWKPTCGVKCLLEEEAIRVGGSNHSHATKDLYDSIAAGNYPEWKLYIQTLDPEHEDKFDFDPLDVTKTWPEDVLPLQPVGRMVLNKNIDNFFAENEQLAFCPAIIVPGVYYSEDKLLQTRIFSYADSQRHRLGPNYLQIPANAPKCA…
DID NOT MATCHED IN NCBI WITH ANY CATALSE	2	cajca.ICPL87119.gnm1.Cc10	GLEAN	gene	1318976	1327394	0.157858	+	ID=cajca.ICPL87119.gnm1.ann1.C.cajan_13455;Name=cajca.C.cajan_13455;evid_id=C.cajan_GLEAN_10035562;Dbxref=Gene3D:G3DSA:1.10.1200.10,Gene3D:G3DSA:2.160.10.10,Gene3D:G3DSA:2.30.38.10,Gene3D:G3DSA:2.40.180.10,Gene3D:G3DSA:3.30.300.30,Gene3D:G3DSA:3.40.50.980,Gene3D:G3DSA:3.50.50.60,InterPro:IPR000873,InterPro:IPR001451,InterPro:IPR006162,InterPro:IPR009081,InterPro:IPR011004,InterPro:IPR011614,Inter…	C.cajan_13455	>CcaCAT10.1	MDPERSIEDQFSKLHPSMPVNTRIGIVGAGPSGISAAYALVRLGYNNITVLEKHHTVGGMCESVEIEGKVYDLGGQVLAASSAPVIFQLAKETGSPLEEMDSHKLAVIDSSTGKYQDVKVADDYVSVMSLTLEIQEKVKNSGRLGVHAVSEVASDLAPDYVERHGLKSVPKSVAYGYTASGYGFIQDMPYAYIHEFTRTSMAGKIRRFKGGYTSLWQRIAESIPIKLHCNTEVLAIKRNSDCVNVNVKGRNESETMEFDKIIISGNFPLKYGRTYRSVPSTCIECETEVMDVSELEKDLFSKVETNDYYTTVLKIKGLEHMPVGFYYFNEYMEDPSTIGNPVAMQKFYADTNIFLFWSYGNSADIKGPTVTELAIKSIESMGGEVENFILQRRFKYFPH…
	3	cajca.ICPL87119.gnm1.Scaffold000231	GLEAN	gene	283388	287622	0.999867	-	ID=cajca.ICPL87119.gnm1.ann1.C.cajan_29750;Name=cajca.C.cajan_29750;evid_id=C.cajan_GLEAN_10020583;Dbxref=Gene3D:G3DSA:2.40.180.10,InterPro:IPR002226,InterPro:IPR010582,InterPro:IPR011614,InterPro:IPR018028,InterPro:IPR020835,InterPro:IPR024708,InterPro:IPR024711,PANTHER:PTHR11465,PANTHER:PTHR11465:SF0,PIR:PIRSF038928,PRINTS:PR00067,Pfam:PF00199,Pfam:PF06628,Prosite:PS00437,Prosite:PS00438,Prosit…	C.cajan_29750	Un known chromosome	MQHRPSSAFNSPFWTTNSGAPVWNNNNSLTVGARGPILLEDYHLVEKLANFDRERIPERVVHARGASAKGFFEVTHDISHLTCADFLRAPGVQTPVIVRFSTVIHERGSPETLRDPRGFAVKFYTREGNFDLVGNNLPVFFVRDGMKFPDMVHALKPNPKSHIQENWRILDFFSHFPESLHMFTFLFDDLGVPQDYRHMDGFGVNTYTLINKAGKAVYVKFHWKTVSGIKCLLEEEAIKVGGSNHSHATQDLHDSIAAGNYPEWKLFVQTIDPDHEDKFDFDPLDVTKTWPEDIIPLQPVGRLVLNKNIDNFFAENEQLAFCPAIVVPGVYYSDDKMLQTRIFSYADSQRHRLGPNYLQLPANAPKCAHHNNHHEGFMNFMHRDEEVNYFPSRYDPVRH…
NCBI		>XP_020216439.1 catalase-3 [Cajanus cajan]										MDPYKNRPSSAFNSPFWTTNSGAPIWNNNSSLTVGSRGPILLEDYHLVEKLANFDRERIPERVVHARGASAKGFFEVTHDISHLTCADFLRAPGVQTPVIVRFSTVIHERGSPETLRDPRGFAVKFYTREGNFDLVGNNFPVFFVRDGLKFPDMVHALKPNPKSHIQEDWRILDFFSHHPESLHMFSFLFDDLGVPQDYRHMDGFGVNTYTLINKAGKALYVKFHWKPTCGVKCLLEEEAIRVGGSNHSHATKDLYDSIAAGNYPEWKLYIQTLDPEHEDKFDFDPLDVTKTWPEDVLPLQPVGRMVLNKNIDNFFAENEQLAFCPAIIVPGVYYSEDKLLQTRIFSYADSQRHRLGPNYLQIPANAPKCAHHNNHHEGFMNFMHRDEEVNYFPSRYDP…

## Sheet: G.max
NCBI_gene_ID	Local_gene_ID	Function_description	PF domain	Chromosome No	gene start position	Gene end position	Orientation	Genome	CDS	Protein
glyma.Zh13.gnm1.ann1.SoyZH13_04G016700	glyma.Zh_04G016700	catalase 2; IPR002226 (Catalase haem-binding site), IPR010582 (Catalase immune-responsive domain), IPR011614 (Catalase core domain), IPR018028 (Catalase, mono-functional, haem-containing), IPR020835 (Catalase-like domain), IPR024708 (Catalase active site); GO:0004096 (catalase activity), GO:0006979 (response to oxidative stress), GO:0020037 (heme binding), GO:0055114 (oxidation-reduction process)	SM001060	4	1374434	1384397	-	CTCAATAAGATATTTACCCTAGGTAATATAGTTACTCTTATTAGAATGCATCAGCGAAGATTTCATGTGAAGATTGATGCAACATATACCATAACAGCAGGAAACATGCCGAAAAGGTATATAAATACTAACAAATACAAACGGCATTTATTGAGATAGGTCAACGAGTTGCATTCATGGAGTTATGGGTACACACAACATAATATTGCAAGAAAAGGATTAGTTCTTTCAGGTAATCCAAAATCACATCCTTATCGTACTCTTTGCACGTCTGCAACTCTAACAATCATTCTGGAGTTGGCAACAACATTAAATATTTGGCCTCGTGCTGAGATGAGAAGCTATCTTTTGGCCTAGAGAACGGTCAGCCTGCATGACAATCCCGATCATGTGAGCAAA…	ATGGGTTTCTCTGTTTTACACCTTATTTCATTGTTGCTTCTTTGGTATTTTTTGCTTGTGCCAGTTATGCTTATAAATTTCAGTGGTTTTTTAAGTTTTGTCTTTTCTTTGTTGCAGTCTTATATTGTATACTTAGGATCACATTCTCATGGCCCAAACCCTTCAGCAAGTGATCTTGAGTCTGCAACGAATTCCCATTACAAATTATTAGGCTCACACTTGGGGAAGGAGTGGAATGCTTCGGGGCCTATGCACGTGGATTTGCTAGAGGGTGCCTTGCAACGCCAAACATCAGTTGAACTCCAAACTAATCTCTGGTCTCCCTGGCTTTCCAAGGATGGAAGTCTTGTACTGAGCGTCCAAAACCACCTTCACCGGCCATCCAGCGCCTTCAATTCT…	MGFSVLHLISLLLLWYFLLVPVMLINFSGFLSFVFSLLQSYIVYLGSHSHGPNPSASDLESATNSHYKLLGSHLGKEWNASGPMHVDLLEGALQRQTSVELQTNLWSPWLSKDGSLVLSVQNHLHRPSSAFNSPFWTTNSGAPIWNNNSSLTVGARGPILLEDYHLVEKLANFDRERIPERVVHARGASAKGFFEVTHDISHLTCADFLRAPGVQTPVIVRFSTVIHERGSPETLRDPRGFAVKFYTREGNFDLVGNNLPVFFVRDGMKFPDMVHALKPNPKNHIQENWRILDFFSHFPESLHMFTFLFDDLGVPQDYRHMDGFGVNTYTLINKAGKAVYVKFHWKTTSGIKCLLEEEAIKVGGANHSHATQDLHDSIAAGNYPEWKLFVQTIDPEHED…
glyma.Zh13.gnm1.ann1.SoyZH13_06G016600	glyma.Zh_06G016600	catalase 2; IPR002226 (Catalase haem-binding site), IPR010582 (Catalase immune-responsive domain), IPR011614 (Catalase core domain), IPR018028 (Catalase, mono-functional, haem-containing), IPR020835 (Catalase-like domain), IPR024708 (Catalase active site); GO:0004096 (catalase activity), GO:0006979 (response to oxidative stress), GO:0020037 (heme binding), GO:0055114 (oxidation-reduction process)	SM001060	6	1350172	1354895	-	ACTTTATAATTTAATACTTTCTTTCTTAATTAATTGGATTACAAGGAACACATAGTCCACAACAATAGCAGCGAAACATGCCGAAAAGGTATATAAATATAAATACTAACACATACAAACGGCATTTATTGAGATAGCTCAACGAGTTGCATGCATGGAGTTATGGGTACACAACTAAAATTGCAAGAAATGGATAAGTTCTTTCAAATTGATCGAAAATCACATCCTTATCGTACTCTTTGCACGTCTGCAACTCTAACAATCATTCTGGGGTTGGCAACAACATTAAATATTTGGCCTCATGCTCAGACGAGATGCTATCTTTTGGCCTAGAGAACGGTCAGCCTGCAAGACAATGCCATCAAAGAGCATATGAGCAAACCATGCAAACTCGTTTAC…	ATGGATCCTTACAAGCTCCGGCCATCCAGCGCCTTCAATTCTCCCTTCTGGACTACAAATTCTGGTGCTCCTGTTTGGAACAACAACTCCTCTTTAACCGTTGGAGCTAGAGGTCCAATTCTGCTTGAGGATTATCATCTTGTGGAGAAGCTTGCAAACTTTGACAGGGAACGTATCCCAGAACGTGTTGTCCATGCCAGGGGAGCTAGTGCAAAGGGTTTCTTTGAGGTCACACATGACATTTCTCACCTGACATGTGCAGATTTCCTTCGAGCCCCTGGAGTTCAGACGCCTGTAATTGTTCGTTTCTCTACTGTCATTCATGAGCGTGGTAGCCCTGAAACCTTGAGGGACCCTCGAGGTTTTGCCGTGAAGTTTTACACCAGAGAGGGTAACTTT…	MDPYKLRPSSAFNSPFWTTNSGAPVWNNNSSLTVGARGPILLEDYHLVEKLANFDRERIPERVVHARGASAKGFFEVTHDISHLTCADFLRAPGVQTPVIVRFSTVIHERGSPETLRDPRGFAVKFYTREGNFDLVGNNLPVFFVRDGMKFPDMVHALKPNPKNHIQENWRILDFFSHFPESLHMFTFLFDDLGVPQDYRHMDGFGVNTYTLINKAGKAVYVKFHWKTTSGIKCLLEEEAIKVGGANHSHATQDLHDSIAAGNYPEWKLFVQTIDPEHEDKFDFDPLDVTKTWPEDIIPLQPVGRLVLNKNIDNFFAENEQLAFCPAIVVPGVYYSDDKMLQTRIFSYADSQRHRLGPNYLQLPANAPKCAHHNNHHEGFMNFIHRDEEVNYFPSRYDP…
glyma.Zh13.gnm1.ann1.SoyZH13_14G205900	glyma.Zh_14G205900	catalase 2; IPR002226 (Catalase haem-binding site), IPR010582 (Catalase immune-responsive domain), IPR011614 (Catalase core domain), IPR018028 (Catalase, mono-functional, haem-containing), IPR020835 (Catalase-like domain), IPR024708 (Catalase active site); GO:0004096 (catalase activity), GO:0006979 (response to oxidative stress), GO:0020037 (heme binding), GO:0055114 (oxidation-reduction process)	SM001060	14	51701327	51704461	+	ACCATTTACCACACCAAAACCAATCGGATCGTTTCCTCTGCGGAGTCAGAAATCCATGGATCCCTACAAGGTTTGCTTTTCTTTTCAGATTGGATTCGATTTCTCAACTTGCTTGTTATTTTGACTGTGTTTTGTTTTCCATTTAGAATCGGCCATCAAGCGCCTTCAATTCTCCCTTCTGGACTACTAATTCCGGTGCTCCCATCTGGAACAACAACTCATCGCTGACTGTTGGATCTAGAGGTACGGTATGGTATTCAATATTATTTTCTCTCTTCATGATCACATTTTTTCATCCAGATGACTCTAACCCAAGACTTTACTTAACAAATTAAGTCAGGACCACTCGGACGAAGGACCTATTACTTGTTGAATTAGGTTAATAAATACTATATGCAG…	ATGGATCCCTACAAGAATCGGCCATCAAGCGCCTTCAATTCTCCCTTCTGGACTACTAATTCCGGTGCTCCCATCTGGAACAACAACTCATCGCTGACTGTTGGATCTAGAGGTCCAATTCTGCTGGAAGATTACCATCTGGTGGAGAAGCTTGCAAACTTTGACAGGGAACGGATCCCCGAACGTGTTGTCCATGCTCGTGGAGCTAGCGCAAAGGGTTTCTTTGAAGTCACGCATGACATTTCTCACCTCACATGTGCCGATTTCCTCCGAGCCCCTGGAGTTCAGACCCCTCTCATCGTCCGTTTCTCCACTGTTATCCACGAACGTGGCAGCCCTGAAACCCTCAGGGATCCCAGAGGTTTCGCTGTGAAATTCTACACTAGAGAGGGTAACTTC…	MDPYKNRPSSAFNSPFWTTNSGAPIWNNNSSLTVGSRGPILLEDYHLVEKLANFDRERIPERVVHARGASAKGFFEVTHDISHLTCADFLRAPGVQTPLIVRFSTVIHERGSPETLRDPRGFAVKFYTREGNFDLVGNNFPVFFVRDGLKFPDMVHALKPNPKSHIQENWRILDFFSHHPESLHMFSFLFDDVGIPQDYRHMDGFGVNTYTLINKAGKAVYVKFHWKTTCGEKCLLDDEAIRVGGSNHSHATQDLYDSIAAGNYPEWKLYIQTLDPENEDRLDFDPLDVTKTWPEDVLPLQPVGRMVLNKNIDNFFAENEQLAFCPAIIVPGVYYSDDKLLQTRIFSYADTQRHRLGPNYLQLPANSPKCAHHNNHHDGFMNFMHRDEEVNYFPSRYDP…
glyma.Zh13.gnm1.ann1.SoyZH13_17G248900	glyma.Zh_17G248900	catalase 2; IPR002226 (Catalase haem-binding site), IPR010582 (Catalase immune-responsive domain), IPR011614 (Catalase core domain), IPR018028 (Catalase, mono-functional, haem-containing), IPR020835 (Catalase-like domain), IPR024708 (Catalase active site); GO:0004096 (catalase activity), GO:0006979 (response to oxidative stress), GO:0020037 (heme binding), GO:0055114 (oxidation-reduction process)	SM001060	17	42607546	42610955	+	AAACAAGGAAAAGCGGGTGGTGACTGTATAGTATAAAATAAAATTGTGCCCATAGAAATAGAATAGTGACAGACACACTCGTGAATCGTGATTTAGCATTTACCACACCAAAATCAATCTGCGGAGTCAGAAAGCCATGGATCCCTACAAGGTTTGCTCTTCTTTTCTTTTCTTTTCGGATTAGATTCGATTAAATTTCTCAACTTGCTTGTTATTTTGACTGTGTTTTGTTTTCCATTTAGAATCGGCCATCAAGCGCCTTCAATTCTCCCTTCTGGACTACAAATTCCGGTGCTCCCATCTGGAACAATAACTCATCGCTGACTGTTGGATCTAGAGGTATGGTATTTAATATTTTTCATTGAATTGAATTAGGTTAATTAATACTAGTATTGGGAA…	ATGGATCCCTACAAGAATCGGCCATCAAGCGCCTTCAATTCTCCCTTCTGGACTACAAATTCCGGTGCTCCCATCTGGAACAATAACTCATCGCTGACTGTTGGATCTAGAGGTCCAATTCTGCTGGAGGATTACCATCTGGTGGAGAAGCTTGCAAACTTTGACAGGGAACGGATCCCCGAACGTGTTGTCCACGCTCGTGGAGCTAGCGCAAAGGGTTTCTTTGAAGTCACGCATGACATTTCTCACCTCACATGTGCCGATTTCCTTCGAGCCCCTGGAGTTCAGACCCCCCTCATCGTCCGTTTCTCCACTGTTATCCACGAGCGTGGCAGCCCCGAAACCCTCAGGGATCCCAGAGGTTTTGCTGTCAAATTCTACACCAGAGAGGGTAACTTC…	MDPYKNRPSSAFNSPFWTTNSGAPIWNNNSSLTVGSRGPILLEDYHLVEKLANFDRERIPERVVHARGASAKGFFEVTHDISHLTCADFLRAPGVQTPLIVRFSTVIHERGSPETLRDPRGFAVKFYTREGNFDLVGNNFPVFFVRDGLKFPDMVHALKPNPKSHIQENWRILDFFSHHPESLHMFSFLFDDVGIPQDYRHMDGFGVNTYTLINKAGKALYVKFHWKTTSGEKSLLDDEAIRVGGSNHSHATQDLYDSIAAGNYPEWKLYIQTLDPENEDRLDFDPLDVTKTWPEDVLPLQPVGRMVLNKNIDNFFAENEQLAFCPAIIVPGVYYSDDKLLQTRVFSYADTQRHRLGPNYLQLPANAPKCAHHNNHHDGFMNFMHRDEEVNYFPSRYDP…

## Sheet: G.soja
NCBI_gene_ID	NCBI_transcript_ID	NCBI_protein_ID	Local_gene_ID	Local_transcript_ID	Local_protein_ID	Function_description	PF domain	Chromosome No	gene start position	Gene end position	Orientation	Genome	CDS	Protein
D0Y65_008493	D0Y65_008493A	RZC14562	Glysoja.04G008496	Glysoja.04G008496.1	Glysoja.04G008496.1	Catalase-4 isoform A [Glycine soja]	SM001060, PF06628	4	1367980	1372190	-	AGATATTTACCCTAGGTAATATAGTTACTCTTATTAGAATGCATCAGCGAAGATTTCATGTGAAGATTGATGCAACATATACCATAACAGCAGGAAACATGCCGAAAAGGTATATAAATACTAACAAATACAAACGGCATTTATTGAGATAGGTCAACGAGTTGCATTCATGGAGTTATGGGTACACACAACATAATATTGCAAGAAAAGGATTAGTTCTTTCAGGTAATCCAAAATCACATCCTTATCGTACTCTTTGCACGTCTGCAACTCTAACAATCATTCTGGAGTTGGCAACAACATTAAATATTTGGCCTCGTGCTGAGATGAGAAGCTATCTTTTGGCCTAGAGAACGGTCAGCCTGCATGACAATCCCGATCATGTGAGCAAACCATGCA…	ATGGATCCCTACAAGCACCGGCCATCCAGCGCCTTCAATTCTCCCTTCTGGACTACAAATTCTGGTGCTCCTATTTGGAACAACAACTCCTCTTTAACCGTTGGAGCTAGAGGTCCAATTCTGCTGGAGGATTATCATCTTGTGGAGAAGCTTGCAAATTTTGATAGGGAACGTATCCCAGAACGTGTTGTCCATGCCAGGGGCGCTAGTGCAAAGGGTTTCTTTGAGGTCACCCATGACATTTCTCACCTGACATGTGCAGATTTCCTTCGAGCCCCTGGAGTTCAGACGCCTGTAATTGTTCGTTTCTCAACTGTCATTCATGAGCGTGGTAGCCCTGAAACCTTGAGGGACCCTCGAGGTTTTGCCGTGAAGTTTTACACCAGAGAGGGTAACTTT…	MDPYKHRPSSAFNSPFWTTNSGAPIWNNNSSLTVGARGPILLEDYHLVEKLANFDRERIPERVVHARGASAKGFFEVTHDISHLTCADFLRAPGVQTPVIVRFSTVIHERGSPETLRDPRGFAVKFYTREGNFDLVGNNLPVFFVRDGMKFPDMVHALKPNPKNHIQENWRILDFFSHFPESLHMFTFLFDDLGVPQDYRHMDGFGVNTYTLINKAGKAVYVKFHWKTTSGIKCLLEEEAIKVGGANHSHATQDLHDSIAAGNYPEWKLFVQTIDPEHEDKFDFDPLDVTKTWPEDIIPLQPVGRLVLNKNIDNFFAENEQLAFCPAIVVPGVYYSDDKMLQTRIFSYADSQRHRLGPNYLQLPANAPKCAHHNNHHEGFMNFIHRDEEVNYFPSRYDP…
D0Y65_008493	D0Y65_008493B	RZC14563	Glysoja.04G008496	Glysoja.04G008496.2	Glysoja.04G008496.2	Catalase-4 isoform B [Glycine soja]
D0Y65_013467	D0Y65_013467	RZC05322	Glysoja.06G013473	Glysoja.06G013473.1	Glysoja.06G013473.1	Catalase-4 [Glycine soja]	SM001060, PF06628	6	1361430	1366850	-	GGGTCACAAAAGCTAGTTTACGTGATTCATTTTCAACATTTTATTTCTCCATTGAGAGTGTGACAAACCAAAAGTTGAAGGAATAATTTTTTAGCCCTTTTTTTCCTGTGATCATACTTTATTTTCTAACTAAAATTTTCTTTTCTCTGATCATACTTTATTTTCTAACATGAACATGCTAGCCAGAATAGAAAGAATTTCAGAAGTGACTAACATACTAACCATCTAACCAAAGCCAGAATCTCCTGACTATTTTTTAACTCCCTCTAATTTAAATCTATACACTTTAAATGGTAGTAGCACATGCCTCGACCAAAACGAGCTGGCATGATAATTACCAAGCGTTTATGGATCGAACTGCCAGGACGAGCGGAATTTCTAATCATCGCAGCCAATATA…	ATGGATCCTTACAAGCTCCGGCCATCCAGCGCCTTCAATTCTCCCTTCTGGACTACAAATTCTGGTGCTCCTGTTTGGAACAACAACTCCTCTTTAACCGTTGGAGCTAGAGGTCCAATTCTGCTTGAGGATTATCATCTTGTGGAGAAGCTTGCAAACTTTGACAGGGAACGTATCCCAGAACGTGTTGTCCATGCCAGGGGAGCTAGTGCAAAGGGTTTCTTTGAGGTCACACATGACATTTCTCACCTGACATGTGCAGATTTCCTTCGAGCCCCTGGAGTTCAGACGCCTGTAATTGTTCGTTTCTCAACTGTCATTCATGAGCGTGGTAGCCCTGAAACCTTGAGGGACCCTCGAGGTTTTGCCGTGAAGTTTTACACCAGAGAGGGTAACTTT…	MDPYKLRPSSAFNSPFWTTNSGAPVWNNNSSLTVGARGPILLEDYHLVEKLANFDRERIPERVVHARGASAKGFFEVTHDISHLTCADFLRAPGVQTPVIVRFSTVIHERGSPETLRDPRGFAVKFYTREGNFDLVGNNLPVFFVRDGMKFPDMVHALKPNPKNHIQENWRILDFFSHFPESLHMFTFLFDDLGVPQDYRHMDGFGVNTYTLINKAGKAVYVKFHWKTTSGIKCLLEEEAIKVGGANHSHATQDLHDSIAAGNYPEWKLFVQTIDPEHEDKFDFDPLDVTKTWPEDIIPLQPVGRLVLNKNIDNFFAENEQLAFCPAIVVPGVYYSDDKMLQTRIFSYADSQRHRLGPNYLQLPANAPKCAHHNNHHEGFMNFIHRDEEVNYFPSRYDP…
D0Y65_039515	D0Y65_039515A	RZB70305	Glysoja.14G039529	Glysoja.14G039529.1	Glysoja.14G039529.1	Catalase-3 isoform A [Glycine soja]	SM001060, PF06628	14	51391433	51395055	+	TTCGTTAGGACTTAGGAAGAGCTTTTGGATAAACATGCACCGTTTTTTCTTCTCCTACTTTTCAGCCATTCCAAGGGTAAAAGATGAACATTTTATCCCTGTAATGCGTAGACAAAAAGTAAAAAAGTAAACTAGAAAGAAGATAAGTACTGGAAACCTGAAAAAGCGGGTGACTGTATAAAATAAAACTAAGCCCATAAAATAGGATAGAGTGACAGACAGATTCGTGATTTACCATTTACCACACCAAAACCAATCGGATCGTTTCCTCTGCGGAGTCAGAAATCCATGGATCCCTACAAGGTTTGCTTTTCTTTTCAGATTGGATTCGATTTCTCAACTTGCTTGTTATTTTGACTGTGTTTTGTTTTCCATTTAGAATCGGCCATCAAGCGCCTT…	ATGGATCCCTACAAGAATCGGCCATCAAGCGCCTTCAATTCTCCCTTCTGGACTACTAATTCCGGTGCTCCCATCTGGAACAACAACTCATCGCTGACTGTTGGATCTAGAGGTCCAATTCTGCTGGAAGATTACCATCTGGTGGAGAAGCTTGCAAACTTTGACAGGGAACGGATCCCCGAACGTGTTGTCCATGCTCGTGGAGCTAGCGCAAAGGGTTTCTTTGAAGTCACGCATGACATTTCTCACCTCACATGTGCCGATTTCCTCCGAGCCCCTGGAGTTCAGACCCCTCTCATCGTCCGTTTCTCCACTGTTATCCACGAACGTGGCAGCCCTGAAACCCTCAGGGATCCCAGAGGTTTCGCTGTGAAATTCTACACTAGAGAGGGTAACTTC…	MDPYKNRPSSAFNSPFWTTNSGAPIWNNNSSLTVGSRGPILLEDYHLVEKLANFDRERIPERVVHARGASAKGFFEVTHDISHLTCADFLRAPGVQTPLIVRFSTVIHERGSPETLRDPRGFAVKFYTREGNFDLVGNNFPVFFVRDGLKFPDMVHALKPNPKSHIQENWRILDFFSHHPESLHMFSFLFDDVGIPQDYRHMDGFGVNTYTLINKAGKAVYVKFHWKTTCGEKCLLDDEAIRVGGSNHSHATQDLYDSIAAGNYPEWKLYIQTLDPENEDRLDFDPLDVTKTWPEDVLPLQPVGRMVLNKNIDNFFAENEQLAFCPAIIVPGVYYSDDKLLQTRIFSYADTQRHRLGPNYLQLPANSPKCAHHNNHHDGFMNFMHRDEEVNYFPSRYDP…
D0Y65_039515	D0Y65_039515B	RZB70306	Glysoja.14G039529	Glysoja.14G039529.2	Glysoja.14G039529.2	Catalase-3 isoform B [Glycine soja]
D0Y65_047058	D0Y65_047058A	RZB58789	Glysoja.17G047079	Glysoja.17G047079.1	Glysoja.17G047079.1	Catalase-1/2 isoform A [Glycine soja]	SM001060, PF06628	17	41904865	41908375	+	CTTAGGAAGAGTTTTTCGATAAACATGGTTTCCCTCACCGTTTTTTCTTCTCCTGCTTTTCAGCCCTTCCAAAGAAAGGGTAAAAGATGAACATTCATGATTTATCCTTGTAAGGCGGTGACAAAAAATAATATAGAAAAGAAGATACCAACTAGAAGTGGAAACAAGGAAAAGCGGGTGGTGACTGTATAGTATAAAATAAAATTGTGCCCATAGAAATAGAATAGTGACAGACACACTCGTGAATCGTGATTTAGCATTTACCACACCAAAATCAATCTGCGGAGTCAGAAAGCCATGGATCCCTACAAGGTTTGCTCTTCTTTTCTTTTCTTTTCGGATTAGATTCGATTAAATTTCTCAACTTGCTTGTTATTTTGACTGTGTTTTGTTTTCCAT…	ATGGATCCCTACAAGAATCGGCCATCAAGCGCCTTCAATTCTCCCTTCTGGACTACAAATTCCGGTGCTCCCATCTGGAACAATAACTCATCGCTGACTGTTGGATCTAGAGGTCCAATTCTGCTGGAGGATTACCATCTGGTGGAGAAGCTTGCAAACTTTGACAGGGAACGGATCCCCGAACGTGTTGTCCACGCTCGTGGAGCTAGCGCAAAGGGTTTCTTTGAAGTCACGCATGACATTTCTCACCTCACATGTGCCGATTTCCTTCGAGCCCCTGGAGTTCAGACCCCCCTCATCGTCCGTTTCTCCACTGTTATCCACGAGCGTGGCAGCCCCGAAACCCTCAGGGATCCCAGAGGTTTTGCTGTCAAATTCTACACCAGAGAGGGTAACTTC…	MDPYKNRPSSAFNSPFWTTNSGAPIWNNNSSLTVGSRGPILLEDYHLVEKLANFDRERIPERVVHARGASAKGFFEVTHDISHLTCADFLRAPGVQTPLIVRFSTVIHERGSPETLRDPRGFAVKFYTREGNFDLVGNNFPVFFVRDGLKFPDMVHALKPNPKSHIQENWRILDFFSHHPESLHMFSFLFDDVGIPQDYRHMDGFGVNTYTLINKAGKALYVKFHWKTTSGEKSLLDDEAIRVGGSNHSHATQDLYDSIAAGNYPEWKLYIQTLDPENEDRLDFDPLDVTKTWPEDVLPLQPVGRMVLNKNIDNFFAENEQLAFCPAIIVPGVYYSDDKLLQTRVFSYADTQRHRLGPNYLQLPANAPKCAHHNNHHDGFMNFMHRDEEVNYFPSRYDP…
D0Y65_047058	D0Y65_047058B	RZB58790	Glysoja.17G047079	Glysoja.17G047079.2	Glysoja.17G047079.2	Catalase-1/2 isoform B [Glycine soja]

## Sheet: lupus angustifolius
cat
lupan.Tanjil.gnm1.NLL-08	lupan.Tanjil.gnm1.ann1.nnV9	gene	18505461	18509219	1	+	.	ID=lupan.Tanjil.gnm1.ann1.Lup003849;Name=lupan.Lup003849;source_id=Lupinus_GLEAN_10011630;identical_support_id=CUFF9.171.1;part_support_id=CUFF9.171.2;Dbxref=Gene3D:G3DSA:2.40.180.10,InterPro:IPR002226,InterPro:IPR010582,InterPro:IPR011614,InterPro:IPR018028,InterPro:IPR020835,InterPro:IPR024708,InterPro:IPR024711,PANTHER:PTHR11465,PANTHER:PTHR11465:SF0,PIR:PIRSF038928,PRINTS:PR00067,Pfam:PF00199…	Lup003849	>LanCAT8.1	MDPYKNRPSSASNSPYWTTNSGAPVWNNNSSLTLGSRGPILLEDYHLVEKLANFDRERIPERVVHARGASAKGFFEVTHDISQLTCADFLRAPGVQTPVIVRFSTVIHERGSPETLRDPRGFAVKFYTREGNFDLVGNNFPVFFIRDGMKFPDMVHALKPNPKSHIQENWRILDFFSHHPESLHMFSFLFDDLGVPQDYRHMEGSGVNTYTLINKAGKAHYVKFHWKPTCGVKSLLEEDAIKVGGSNHSHATQDLYDSIAAGNYPEWKLYIQTIDPDHEDRFDFDPLDVTKTWPEDILPLQPVGRLVLNKNIDNFFNENEQLAFCPAIIVPGVYYSDDKLLQTRIFSYADTQRHRLGPNYLQLPVNAPKSAHHNNHHDGSMNFIHRDEEVNYFPSRYDP…
lupan.Tanjil.gnm1.NLL-13	lupan.Tanjil.gnm1.ann1.nnV9	gene	7342275	7343559	0.866	-	.	ID=lupan.Tanjil.gnm1.ann1.Lup029401;Name=lupan.Lup029401;source_id=Lupinus_GLEAN_10017033;Dbxref=Gene3D:G3DSA:2.40.180.10,InterPro:IPR011614,InterPro:IPR018028,InterPro:IPR020835,PANTHER:PTHR11465,PANTHER:PTHR11465:SF0,Pfam:PF00199,Prosite:PS51402,SMART:SM01060,Superfamily:SSF56634;Ontology_term=GO:0004096,GO:0006979,GO:0020037,GO:0055114;Note=catalase 2%3B IPR011614 (Catalase core domain)%2C IPR…	Lup029401	>LanCAT13.1	MEGSGINTYTLINKAWKTHYVKFHSKPTCGLKCLPEEEAFKVGGSNHNHATQHLYDSIAAGNYREWKLYIQTINPDHEDRYDFDPLDVTKTWPEDILPLQPVGRLVLNKNIDSFFNENEQLAFCPAIVVLPVNAPKCAHHNNHHEGFMNFMHRDVEVNYFPSRYDPVRHAETHPIPSAIFNGKHEKCIIEKENNFKQPGERY
lupan.Tanjil.gnm1.NLL-14	lupan.Tanjil.gnm1.ann1.nnV9	gene	16047574	16051562	1	+	.	ID=lupan.Tanjil.gnm1.ann1.Lup012324;Name=lupan.Lup012324;source_id=Lupinus_GLEAN_10026176;Dbxref=Gene3D:G3DSA:2.40.180.10,InterPro:IPR002226,InterPro:IPR010582,InterPro:IPR011614,InterPro:IPR018028,InterPro:IPR020835,InterPro:IPR024708,InterPro:IPR024711,PANTHER:PTHR11465,PANTHER:PTHR11465:SF0,PIR:PIRSF038928,PRINTS:PR00067,Pfam:PF00199,Pfam:PF06628,Prosite:PS00437,Prosite:PS00438,Prosite:PS51402…	Lup012324	>LanCAT14.1

## Sheet: lotus japonicas
Catalase
>Lj1g3v2295120.1 tr|A0PG71|A0PG71_LOTJA Catalase OS=Lotus japonicus GN=cat1 PE=3 SV=1,100,1e-18, ,NODE_721_length_117_cov_6323.769043.path2.1	Lj1g3v2295120.1	>LjaCAT1.1	MNFMHRDEEVNYFPSRYDPVRHAERYPIPPAICTGSRERCAIEKE						Truncated proteins however 2 protein with name catalase 1 a and 1b are available but the information regarding chromosome and other is missing
>Lj0g3v0084369.1 tr|I0S3M6|I0S3M6_MYCXE Catalase OS=Mycobacterium xenopi RIVM700367 GN=MXEN_00865 PE=4 SV=1,29.49,2.8,seg,NULL,CUFF.4423.1	Lj0g3v0084369.1	>LjaCAT1.2	MSNMNPNCRISSASLPDHEIYNLEATFPLSNPTIEPPPPKPSPRYLETHPHLQQAQQLVNPNHTHRTLSQSLTLHVVSAIEEKRKRSKERDRLSPLFPRKPKIPNLNLEITG
>Lj0g3v0166709.1 tr|A0PG71|A0PG71_LOTJA Catalase OS=Lotus japonicus GN=cat1 PE=3 SV=1,97.78,7e-18, ,NODE_721_length_117_cov_6323.769043.path1.1	Lj0g3v0166709.1	>LjaCAT1.3	MNFMHRDEEVNYFPSRYDPVRHAERYPIPPAICTGSRERCAIEKE
>Lj0g3v0166859.1 tr|F2WW08|F2WW08_VIGRA Catalase OS=Vigna radiata GN=CAT PE=2 SV=1,93.88,2e-19,Catalase,Catalase core domain; Heme-dependent catalase-like,Catalase-like domain; SUBFAMILY NOT NAME,NODE_7474_length_104_cov_4227.759766.path1.1	Lj0g3v0166859.1	>LjaCAT1.4	MDPYKHRPSSAFNSPFWTTNSGAPVWNNNNSMTVGVRGPILLEDYHLVE

## Sheet: M. trancatula
Gene ID	Functional description	Gene Protein
>Medtr3g115370.	catalase-4	MDPYKHRPSSAYNSPFWTTNSGAPVWNNNSSLTVGSRGPILLEDYHLVEKLAQFDRERIPERVVHARGASAKGFFEVTHDISHLTCADFLRAPGVQTPVIVRFSTVIHERGSPETLRDPRGFAVKFYTREGNFDLVGNNFPVFFVHDGMNFPDMVHALKPNPKSHIQENWRILDFFSHFPESLHMFSFLFDDVGVPQDYRHMDGFGVNTYSLINKAGKAVYVKFHWKPTCGVKCLLEEEAIKVGGANHSHATQDLYDSIAAGNYPEWKLFVQTIDPAHEDKFDFDPLDVTKTWPEDIIPLQPVGRLVLNKNIDNFFAENEQLAFCPAIIVPGVYYSDDKMLQTRIFSYADSQRHRLGPNYLQLPANAPKCAHHNNHHEGFMNFIHRDEEVNYFPSRHDP…

## Sheet: pisum setivum
Catalase
>pissa.Cameor.gnm1.ann1.Psat0s498g0080.1					no descriptation available for this in NCBI			Psat0s498g0080.1	Catalase 1	MDPYKHRPSSAFNSPFWTTNSGAPVWNNNSSLTVGSRGPILLEDYHLVEKLAQFDRERIPERVVHARGASAKGFFEVTHDISHLTCADFLRAPGVQTPVIVRFSTVIHERGSPETLRDPRGFAVKFYTREGNYDLVGNNFPVFFVHDGMNFPDMVHALKPNPQTHIQENWRILDFFSHFPESLHMFSFLFDDVGVPQDYRHMDGFGVNTYTLINKAGKSVYVKFHWKPTCGVKCLLEEEAIQVGGSNHSHATKDLYDSIAAGNYPEWKLYIQTIDPAHEDRFEFDPLDVTKTWPEDIIPLQPVGRMVLNKNIDNFFAENEQLAFCPAIIVPGIYYSDDKMLQTRVFSYADSQRHRLGPNYLQLPVNAPKCSHHNNHHEGFMNAIHRDEEVNYFPSRHDT…

[truncated: 4 more sheets: phaseolus vulgares, vigna angularis, vagina radiata, Vagina unquiculata]
