# Supplementary material for: Whole-Genome Identification of APX and CAT Gene Families in Cultivated and Wild Soybeans and Their Regulatory Function in Plant Development and Stress Response
Source: Antioxidants (Basel). 2022 Aug 22;11(8):1626. doi: 10.3390/antiox11081626 (PMC9404807; doi:10.3390/antiox11081626)
Supplement: Supplementary file 1 [file antioxidants-11-01626-s001.zip › Table S5.xlsx]

## Sheet: APX orthologes
GmaChr06	Gma06G109600.m1	==	GsoChr04	Gso04G010747.1
GmaChr06	Gma06G109600.m1	==	GsoChr06	Gso06G014412.1
GmaChr02	Gma02G190600.m1	==	GsoChr02	Gso02G004609.1
GmaChr02	Gma02G190600.m1	==	GsoChr14	Gso14G039073.1
GmaChr14	Gma14G162900.m1	==	GsoChr02	Gso02G004609.1
GmaChr14	Gma14G162900.m1	==	GsoChr14	Gso14G039073.1
GmaChr04	Gma04G223500.m2	==	GsoChr04	Gso04G010747.1
GmaChr04	Gma04G223500.m2	==	GsoChr06	Gso06G014412.1
GmaChr11	Gma11G076100.m1	==	GsoChr01	Gso01G001741.1
GmaChr11	Gma11G076100.m1	==	GsoChr11	Gso11G029301.1
GmaChr11	Gma11G078900.m1	==	GsoChr11	Gso11G029327.1
GmaChr11	Gma11G104300.m1	==	GsoChr11	Gso11G029583.1
GmaChr11	Gma11G142000.m1	==	GsoChr11	Gso11G029970.1
GmaChr11	Gma11G104300.m1	==	GsoChr12	Gso12G033246.1
GmaChr11	Gma11G142000.m1	==	GsoChr12	Gso12G033638.2
GmaChr01	Gma01G148100.m1	==	GsoChr01	Gso01G001741.1
GmaChr12	Gma12G031100.m1	==	GsoChr11	Gso11G029583.1
GmaChr12	Gma12G067000.m1	==	GsoChr11	Gso11G029970.1
GmaChr12	Gma12G031100.m1	==	GsoChr12	Gso12G033246.1
GmaChr12	Gma12G067000.m1	==	GsoChr12	Gso12G033638.2

## Sheet: CAT Orthologes
GmaChr06	Gma06G016600.m1	==	GsoChr04	Gso04G008496.1
GmaChr06	Gma06G016600.m1	==	GsoChr06	Gso06G013473.1
GmaChr06	Gma06G016600.m1	==	GsoChr14	Gso14G039529.1
GmaChr06	Gma06G016600.m1	==	GsoChr17	Gso17G047079.1
GmaChr17	Gma17G248900.m1	==	GsoChr04	Gso04G008496.1
GmaChr17	Gma17G248900.m1	==	GsoChr06	Gso06G013473.1
GmaChr17	Gma17G248900.m1	==	GsoChr14	Gso14G039529.1
GmaChr17	Gma17G248900.m1	==	GsoChr17	Gso17G047079.1
GmaChr14	Gma14G205900.m1	==	GsoChr04	Gso04G008496.1
GmaChr14	Gma14G205900.m1	==	GsoChr06	Gso06G013473.1
GmaChr14	Gma14G205900.m1	==	GsoChr14	Gso14G039529.1
GmaChr14	Gma14G205900.m1	==	GsoChr17	Gso17G047079.1
GmaChr04	Gma04G016700.m1	==	GsoChr04	Gso04G008496.1
GmaChr04	Gma04G016700.m1	==	GsoChr06	Gso06G013473.1
GmaChr04	Gma04G016700.m1	==	GsoChr14	Gso14G039529.1
GmaChr04	Gma04G016700.m1	==	GsoChr17	Gso17G047079.1
