# Supplementary material for: Whole-Genome Identification of APX and CAT Gene Families in Cultivated and Wild Soybeans and Their Regulatory Function in Plant Development and Stress Response
Source: Antioxidants (Basel). 2022 Aug 22;11(8):1626. doi: 10.3390/antiox11081626 (PMC9404807; doi:10.3390/antiox11081626)
Supplement: Supplementary file 1 [file antioxidants-11-01626-s001.zip › Table S6.xlsx]

## Sheet: Gmax expression 14 tissues read
		young_leaf	flower	one cm pod	pod shell 10DAF	pod shell 14DAF	seed 10DAF	seed 14DAF	seed 21DAF	seed 25DAF	seed 28DAF	seed 35DAF	seed 42DAF	root	nodule
APX genes	Gene id	YL	F	P-1cm	PS-10D	PS-14D	S-10d	S-14d	S-21d	S-25d	S-28	S-35	S-42d	R	N
Glyma01g36940	GmaAPX1.1	0	0	0	0	1	0	0	0	0	0	0	0	1	0
Glyma04g42720	GmaAPX4.1	19	12	24	27	27	5	14	11	23	11	19	12	19	10
Glyma06g12020	GmaAPX6.1	17	10	9	12	10	3	7	3	3	1	1	0	11	2
Glyma11g08320	GmaAPX11.1	4	4	4	5	8	0	0	0	1	0	0	0	11	6
Glyma11g11460	GmaAPX11.3	37	32	31	33	29	7	24	20	10	7	7	3	26	20
Glyma11g15680	GmaAPX11.4	120	112	101	122	205	122	89	83	35	18	23	14	155	255
Glyma12g03610	GmaAPX12.1	15	13	12	12	15	3	6	5	4	2	2	2	11	16
Glyma12g07780	GmaAPX12.2	156	95	99	109	159	105	86	116	49	18	29	12	304	125
Glyma14g35440	GmaAPX14.1	38	6	12	10	11	1	2	1	4	2	5	2	2	0
Glyma04g01920	GmaCAT4.1	44	33	16	22	21	2	6	8	4	4	6	2	15	89
Glyma06g02040	GmaCAT6.1	78	52	24	35	37	3	8	12	10	6	7	4	15	3
Glyma14g39810	GmaCAT14.1	9	37	19	20	23	6	12	10	7	5	6	5	17	38
Glyma17g38140	GmaCAT17.1	27	43	37	27	27	12	33	44	31	18	29	20	63	81
CAT genes
Glyma04g01920	GmaCAT4.1	44	33	16	22	21	2	6	8	4	4	6	2	15	89
Glyma06g02040	GmaCAT6.1	78	52	24	35	37	3	8	12	10	6	7	4	15	3
Glyma14g39810	GmaCAT14.1	9	37	19	20	23	6	12	10	7	5	6	5	17	38
Glyma17g38140	GmaCAT17.1	27	43	37	27	27	12	33	44	31	18	29	20	63	81
