# Supplementary material for: Whole-Genome Identification of APX and CAT Gene Families in Cultivated and Wild Soybeans and Their Regulatory Function in Plant Development and Stress Response
Source: Antioxidants (Basel). 2022 Aug 22;11(8):1626. doi: 10.3390/antiox11081626 (PMC9404807; doi:10.3390/antiox11081626)
Supplement: Supplementary file 1 [file antioxidants-11-01626-s001.zip › Table S7.xlsx]

## Sheet: Expression Data
Gene id	William 82. a4	William 82.a1	Gene symbol	CT49_Ch	CT50_Ch	CT51_Ch	Average	WD52_Ch	WD53_Ch	WD54_Ch	Average	HS55_Ch	HS56_Ch	HS57_Ch	Average	CS58_Ch	CS59_Ch	CS60_Ch	Average
GmaAPX1.1	Glyma.01G164700	Glyma01g36940	LOC100813526	3.52421	2.28571	0	1.93664	0	2.74598	0.886292	1.21076	3.78295	5.57629	0	3.11975	2.47805	0	0	0.826016
GmaAPX2.1	glyma.14G177200	Glyma14g35440	LOC100795192	3244.91	4224.75	6956.63	4808.77	5341.03	6201.34	3608.09	5050.16	2149.98	1564.15	3462.96	2392.36	2731.63	1951.1	1470.46	2051.06
GmaAPX4.1	glyma.04G248300	Glyma04g42720	LOC100802238	2440.51	2620.95	3520.68	2860.71	3452.45	4024.69	3185.33	3554.16	2703.55	2375.5	2890.57	2656.54	4879.27	3180.58	2989.75	3683.2
GmaAPX6.1	glyma.06G114400	Glyma06g12020	LOC100784258	3820.24	3978.66	6146.02	4648.31	5827.18	6736.8	5287.62	5950.53	3119.68	2948	3040.59	3036.09	3539.48	2642.06	2082.02	2754.52
GmaAPX11.1	glyma.11G078400	Glyma11g08320	LOC100806101	28.1936	4.57142	0	10.9217	3.73238	7.32261	5.31775	5.45758	17.6538	3.71753	1.78595	7.71909	6.60812	5.79945	0.800469	4.40268
GmaAPX11.2	glyma.01G164700	Glyma01g36940	LOC100813526	3.52421	2.28571	0	1.93664	0	2.74598	0.886292	1.21076	3.78295	5.57629	0	3.11975	2.47805	0	0	0.826016
GmaAPX11.3	glyma.11G107200	Glyma11g11460	LOC100170737	5982.34	5718.08	8669.91	6790.11	7155.9	7578.9	6048.94	6927.92	4450.01	4439.66	5010.49	4633.39	7932.23	4342.13	4364.16	5546.17
GmaAPX11.4	glyma.11G150243v4	Glyma11g15680	APX1	9862.49	10276.6	13122.5	11087.2	13531.7	15280.5	19264.4	16025.5	8420.85	8154.39	10499.6	9024.96	22267.7	11392.6	13794.5	15818.3
GmaAPX12.1	glyma.12G032300	Glyma12g03610	LOC100170727	9603.46	9436.93	11867.4	10302.6	9033.29	8268.15	7470.55	8257.33	5086.81	5410.86	8626.15	6374.61	8450.14	4848.34	5453.59	6250.69
GmaAPX12.2	glyma.12G073100	Glyma12g07780	APX2	7822.86	7635.03	10374.8	8610.9	8993.17	11627.4	12448	11022.8	5939.24	5547.48	6175.83	5887.51	10867.9	8042.18	7489.99	8800.02
GmaAPX14.1	glyma.14G177200	Glyma14g35440	LOC100795192	3244.91	4224.75	6956.63	4808.77	5341.03	6201.34	3608.09	5050.16	2149.98	1564.15	3462.96	2392.36	2731.63	1951.1	1470.46	2051.06
			Gene symbol	CT49_Ch	CT50_Ch	CT51_Ch	Average	WD52_Ch	WD53_Ch	WD54_Ch	Average	HS55_Ch	HS56_Ch	HS57_Ch	Average	CS58_Ch	CS59_Ch	CS60_Ch	Average
GmaCAT4.1	glyma.04G017500	Glyma04g01920	CAT4	67253.3	63761.4	79525.9	70180.2	80103.4	72996.4	52249.6	68449.8	65353	61676.5	106320	77783.1	112541	94288.3	89839.8	98889.8
GmaCAT6.1	glyma.06G017900	Glyma06g02040	CAT5	41976.8	42150	52535.1	45554	51545.1	50227.6	32551.7	44774.8	16637.4	16428.7	41315.3	24793.8	41906.2	32083.4	29185.9	34391.8
GmaCAT14.1	glyma.14G223500	Glyma14g39810	CAT3	4997.32	4947.8	4905.52	4950.21	3155.73	2918.06	2256.5	2776.76	1901.56	2377.36	3206.68	2495.2	1604.12	2767.17	2906.5	2425.93
GmaCAT17.1	glyma.17G261700,	Glyma17g38140	CAT1	2891.61	3217.52	3592.85	3233.99	3582.15	3296.09	2825.5	3234.58	1989.83	2190.55	2074.38	2084.92	3375.93	2685.14	2339.77	2800.28
						Log 2 fold change
Gene id	CT	WD	HS	WD+HS	Gene ID	WS	HS	WH
GmaAPX1.1	1.93664	1.21076	3.11975	0.826016	GmaAPX1.1	-0.677645	1.36552	-1.91719
GmaAPX4.1	2860.71	3554.16	2656.54	3683.2	GmaAPX4.1	0.313133	-0.41996	0.471413
GmaAPX6.1	4648.31	5950.53	3036.09	2754.52	GmaAPX6.1	0.356314	-0.970806	-0.140412
GmaAPX11.1	10.9217	5.45758	7.71909	4.40268	GmaAPX11.1	-1.00086	0.500169	-0.810048
GmaAPX11.3	6790.11	6927.92	4633.39	5546.17	GmaAPX11.3	0.0289867	-0.580354	0.259425
GmaAPX11.4	11087.2	16025.5	9024.96	15818.3	GmaAPX11.4	0.53148	-0.828382	0.8096
GmaAPX12.1	10302.6	8257.33	6374.61	6250.69	GmaAPX12.1	-0.31926	-0.373339	-0.0283211
GmaAPX12.2	8610.9	11022.8	5887.51	8800.02	GmaAPX12.2	0.356261	-0.904766	0.579848
GmaAPX14.1	4808.77	5050.16	2392.36	2051.06	GmaAPX14.1	0.0706608	-1.07789	-0.222064
GmaCAT4.1	70180.2	68449.8	77783.1	98889.8	GmaCAT4.1	-0.0360183	0.18441	0.346366
GmaCAT6.1	45554	44774.8	24793.8	34391.8	GmaCAT6.1	-0.0248894	-0.852707	0.472086
GmaCAT14.1	4950.21	2776.76	2495.2	2425.93	GmaCAT14.1	-0.834087	-0.154248	-0.0406179
GmaCAT17.1	3233.99	3234.58	2084.92	2800.28	GmaCAT17.1	0.000262123	-0.633584	0.425577
