# Supplementary material for: Whole-Genome Identification of APX and CAT Gene Families in Cultivated and Wild Soybeans and Their Regulatory Function in Plant Development and Stress Response
Source: Antioxidants (Basel). 2022 Aug 22;11(8):1626. doi: 10.3390/antiox11081626 (PMC9404807; doi:10.3390/antiox11081626)
Supplement: Supplementary file 1 [file antioxidants-11-01626-s001.zip › Table S8.xlsx]

## Sheet: Sheet1
Supplementary Table S8: Details of the primers used in the qRT-PCR analysis of APX and CAT genes of G. max and G. soja
Gene	Forward primer	Reverse primer	Amplicon size
GsoActin-11	CGAGCGGGAAATTGTAAGGG	TCTTCTCCACAGACGAGCTG	104
GsoAPX1.1	ACATCGTTGCCCTATGTGGA	GCGGAAGCTTTGATCGGTTA	185
GsoAPX6.1	TCTACATGCCCAAACCACCT	CGGTCAAGAGCCAACATGAG	178
GsoAPX4.1	TTGCGGCATTCAGAGAGAGA	TCTCCAACAACCACAATGGC	199
GsoAPX11.3	TAAGACCAAGACCGGTGGAC	ACCTCAACTGCAACAACACC	174
GsoAPX12.2	AGGGTCCCTGGACCTCTAAT	CCTCAGCGTAATCAGCGAAG	186
GsoCAT4.1	TGGTCGCTTGGTCCTGAATA	GGTCCAAGTCTGTGCCTTTG	165
GsoCAT14.1	ACAAGAATCGGCCATCAAGC	GCAAGCTTCTCCACCAGATG	145
GsoCAT17.1	ACTCATCGCTGACTGTTGGA	AAATCGGCACATGTGAGGTG	181
