# Supplementary material for: Whole-Genome Identification of APX and CAT Gene Families in Cultivated and Wild Soybeans and Their Regulatory Function in Plant Development and Stress Response
Source: Antioxidants (Basel). 2022 Aug 22;11(8):1626. doi: 10.3390/antiox11081626 (PMC9404807; doi:10.3390/antiox11081626)
Supplement: Supplementary file 1 [file antioxidants-11-01626-s001.zip › Table S9.xlsx]

## Sheet: G.max
Table S9: Cultivated soybean APX and CAT genes closest homologs in Arabidopsis
Gene Rename Id	Arabidopsis Homolog	Local Gene Id
APX
>GmaAPX1.1	AT4G35000.1	SoyZH13_01G148100
>GmaAPX2.1	AT4G09010.1	SoyZH13_02G190600
>GmaAPX4.1	AT1G77490.1	SoyZH13_04G223500
>GmaAPX6.1	AT1G77490.1	SoyZH13_06G109600
>GmaAPX11.1	AT4G35000.1	SoyZH13_11G076100
>GmaAPX11.2	AT4G35000.1	SoyZH13_11G078900
>GmaAPX11.3	AT4G35000.1	SoyZH13_11G104300
>GmaAPX11.4	AT3G09640.1	SoyZH13_11G142000
>GmaAPX12.1	AT4G35000.1	SoyZH13_12G031100
>GmaAPX12.2	AT1G07890.1	SoyZH13_12G067000
>GmaAPX14.1	AT4G09010.1	SoyZH13_14G162900
Catalase
GmaCAT4.1	AT4G35090.1	glyma.Zh_04G016700
GmaCAT6.1	AT4G35090.1	glyma.Zh_06G016600
GmaCAT14.1	AT4G35090.1	glyma.Zh_14G205900
GmaCAT17.1	AT4G35090.1	glyma.Zh_17G248900

## Sheet: G.soja
Table S9: Wild soybean APX and CAT genes closest homologs in Arabidopsis
Gene Rename Id	Arabidopsis Homolog	Local Gene Id
APX
GsoAPX1.1	AT4G39980	Glysoja.01G001741
GsoAPX4.1	AT1G77490	Glysoja.04G010747
GsoAPX6.1	AT4G32320	Glysoja.06G013959
GsoAPX6.2	AT1G77490	Glysoja.06G014412
GsoAPX11.1	AT4G39980	Glysoja.11G029301
GsoAPX11.2	AT4G39980	Glysoja.11G029327
GsoAPX11.3	AT4G39980	Glysoja.11G029583
GsoAPX11.4	AT1G07890	Glysoja.11G029970
GsoAPX12.1	AT4G39980	Glysoja.12G033246
GsoAPX12.2	AT1G07890	Glysoja.12G033638
Catalase
GsoCAT4.1	AT4G40070	Glysoja.04G008496
GsoCAT6.1	AT4G40070	Glysoja.06G013473
GsoCAT14.1	AT4G35090	Glysoja.14G039529
GsoCAT17.1	AT4G35090	Glysoja.17G047079
